# Supplementary material for: The mechanism, electronic and ligand effects for reductive elimination from arylPd(ii) trifluoromethyl complexes: a systematic DFT study
Source: Royal Society of Chemistry journal article supplement (doi:10.1039/c4dt03267e), 2015-01-01
Supplement: c4dt03267e1.pdf [file c4dt03267e1.pdf]

## Electronic Supplementary Information

# Mechanism, Electronic and Ligand Effects for Reductive Elimination from ArylPd(II) Trifluoromethyl Complexes: a Systematic DFT Study

Song-Lin Zhang\*, Lu Huang and Li-Jun Sun

*The Key Laboratory of Food Colloids and Biotechnology, Ministry of Education,  
School of Chemical and Material Engineering, Jiangnan University, Wuxi 214122,  
Jiangsu Province, China*

### Contents

|                                                              |     |
|--------------------------------------------------------------|-----|
| 1. Additional Computational Results -----                    | S2  |
| 2. Computed Energies for Relevant Stationary Points -----    | S14 |
| 3. Cartesian Coordinates of Relevant Stationary Points ----- | S16 |

## 1. Additional Computational Results

### 1.1 Computational methods effect using different DFT functionals

(a) Density functional theory method effects on optimized structures

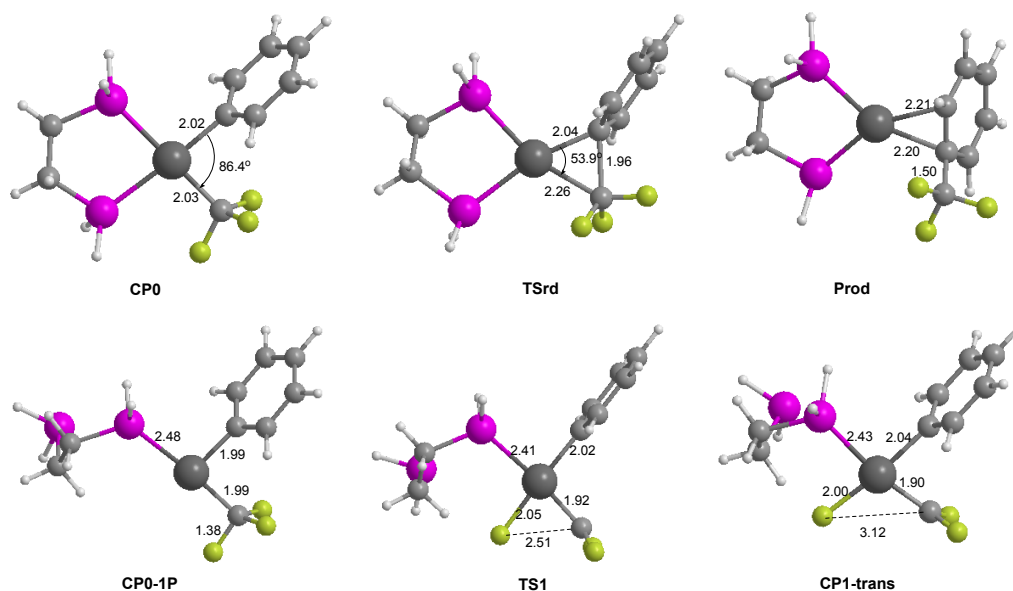

*Fig. S1* Optimized intermediates and transition states involved in direct reductive elimination and  $\alpha$ -fluoride elimination steps using B3P86 method.

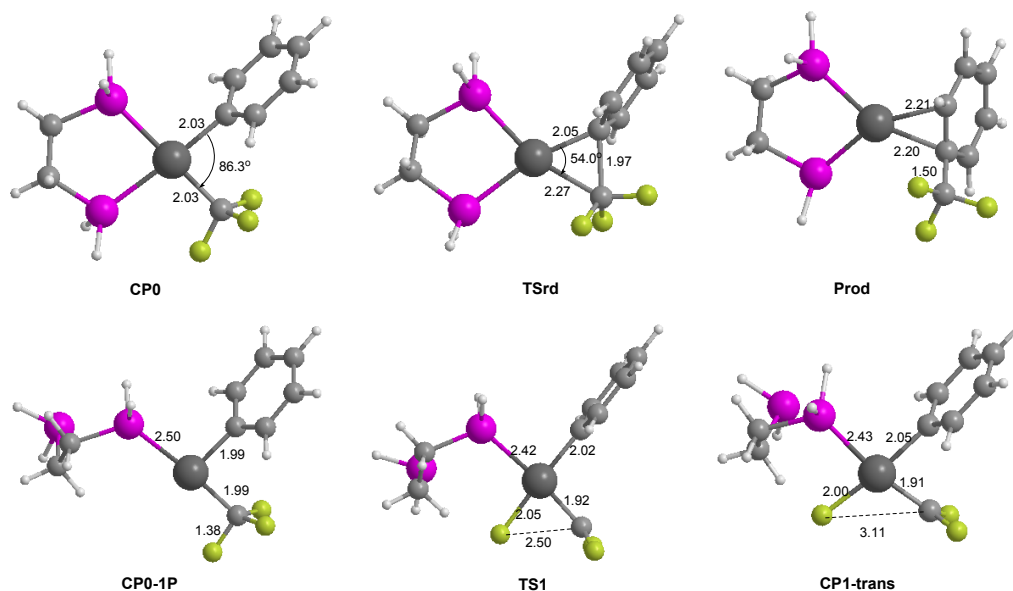

*Fig. S2* Optimized intermediates and transition states involved in direct reductive elimination and  $\alpha$ -fluoride elimination steps using B3PW91 method.

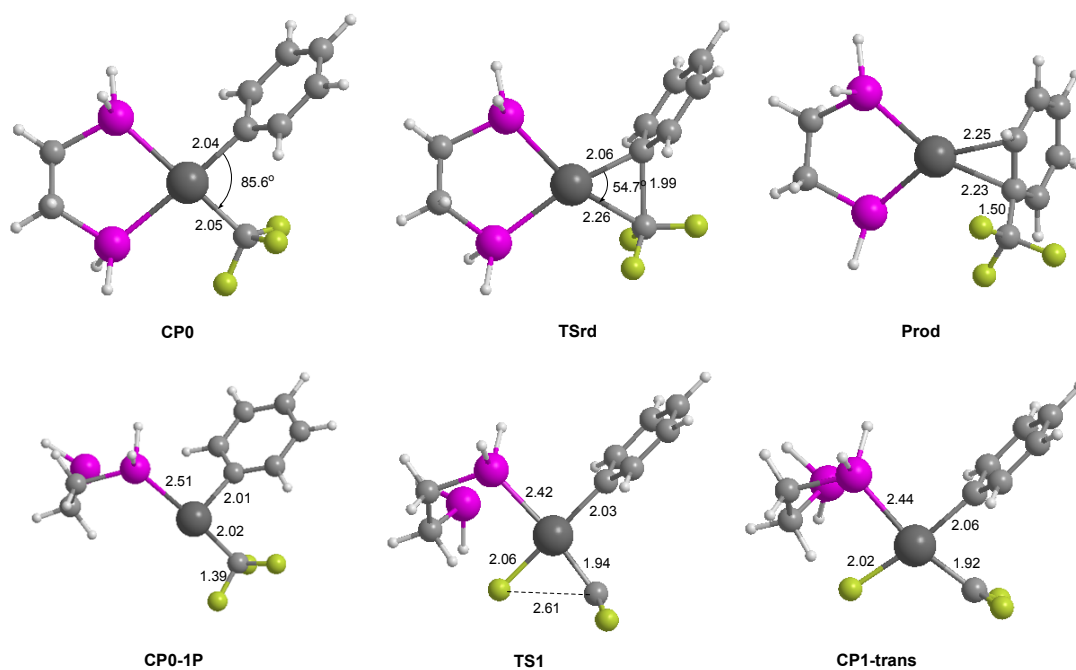

*Fig. S3* Optimized intermediates and transition states involved in direct reductive elimination and  $\alpha$ -fluoride elimination steps using M06 method.

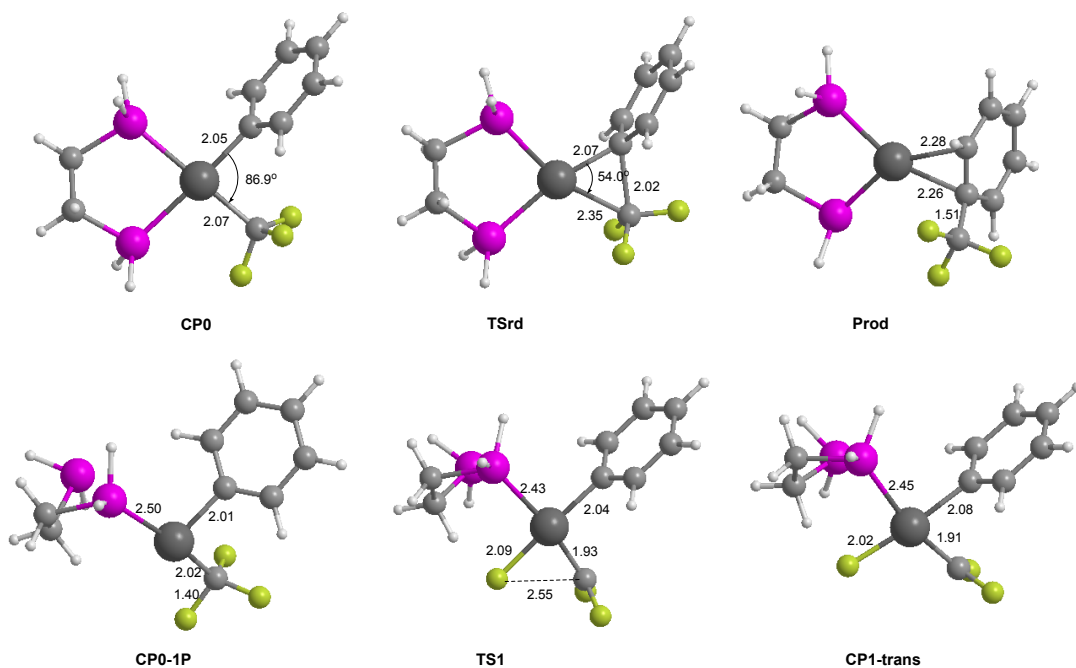

*Fig. S4* Optimized intermediates and transition states involved in direct reductive elimination and  $\alpha$ -fluoride elimination steps using B97D method.

As can be seen from Figs. S1-S4, for various DFT methods, there are only very minor differences for the key bond lengths and bond angles in the relevant key intermediates and transition states involved in direct reductive elimination mechanism and  $\alpha$ -fluoride elimination step.

(b) Density functional effects on predicted energy profiles

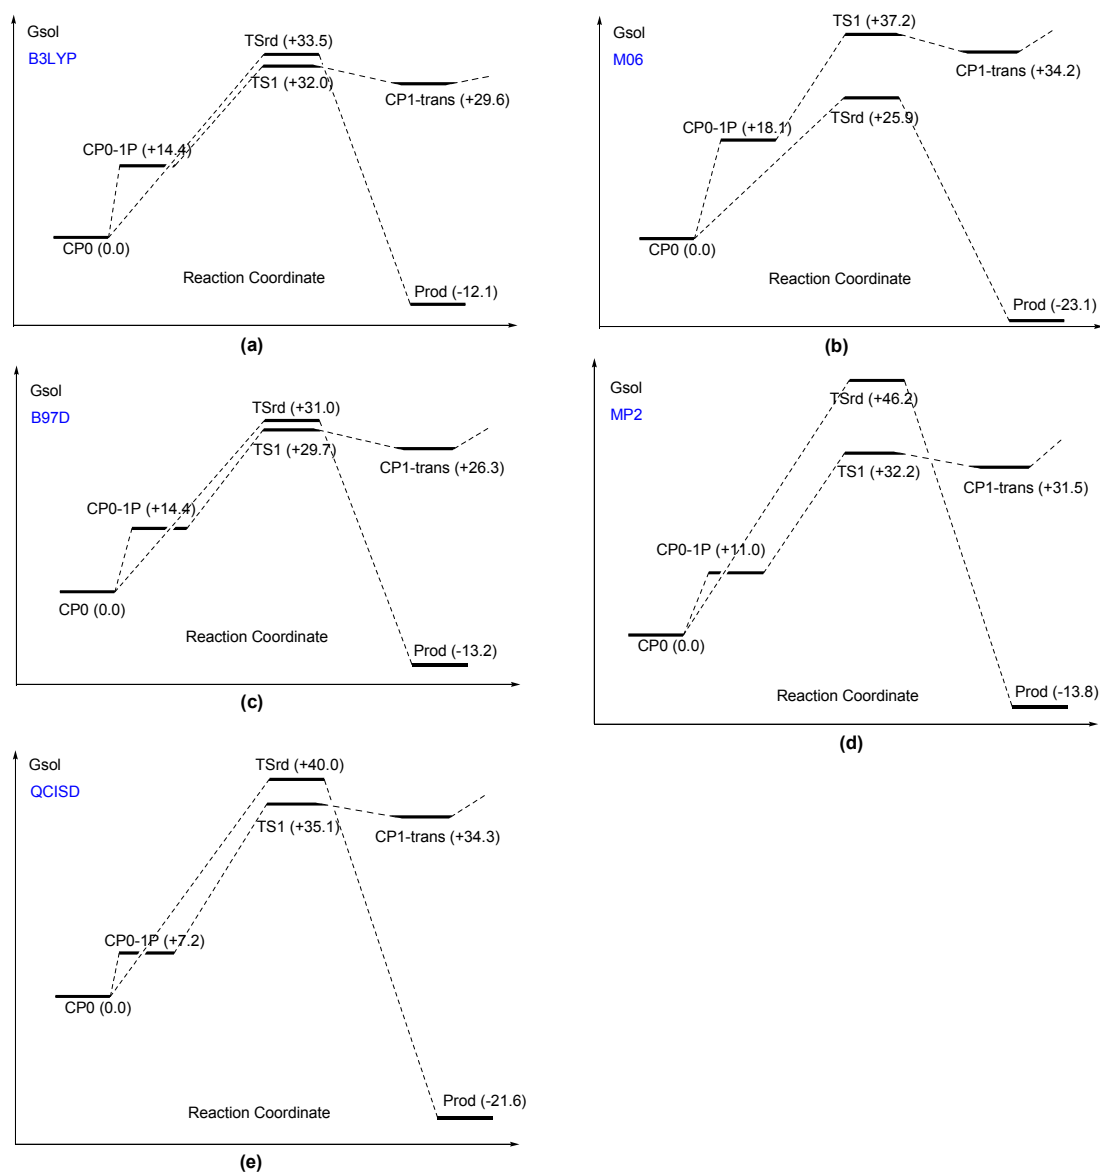

Figure S5. Reaction energy profiles for the key steps of direct reductive elimination

and  $\alpha$ -fluoride elimination using different DFT functionals in combination with SMD solvation model on the B3LYP-based optimized geometries. Values in parentheses are relative Gibbs free energies in kcal/mol.

As can be seen, B3LYP, B97D, MP2 and QCISD methods gives similar shape of reaction profiles (especially with regard to the relative energy levels of **TSrd** and **TS1**) although there are some differences about the absolute values. Given the experimental conditions and observations, B97D functional in combination with SMD based on the B3LYP-optimized geometries should be a reasonable method.

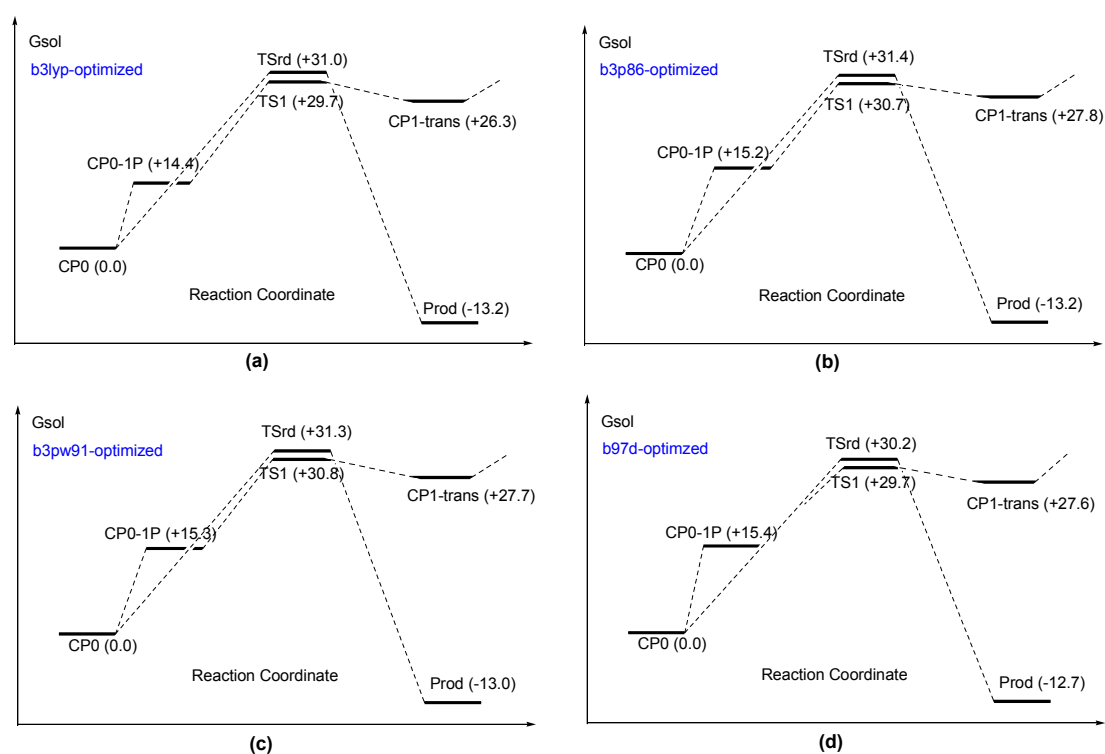

*Fig. S6* Reaction energy profiles predicted by B97D/SMD based on optimized structures by different DFT functionals. Values in parentheses are relative Gibbs free energies in kcal/mol.

As can be seen, reaction profiles predicted by B97D/SMD method based on optimized geometries by these different DFT methods are of similar shape and magnitudes of values (especially regarding the relative energy levels of **TSrd** and **TS1**), and therefore essentially lead to the same conclusions.

(c) Solvation model examination

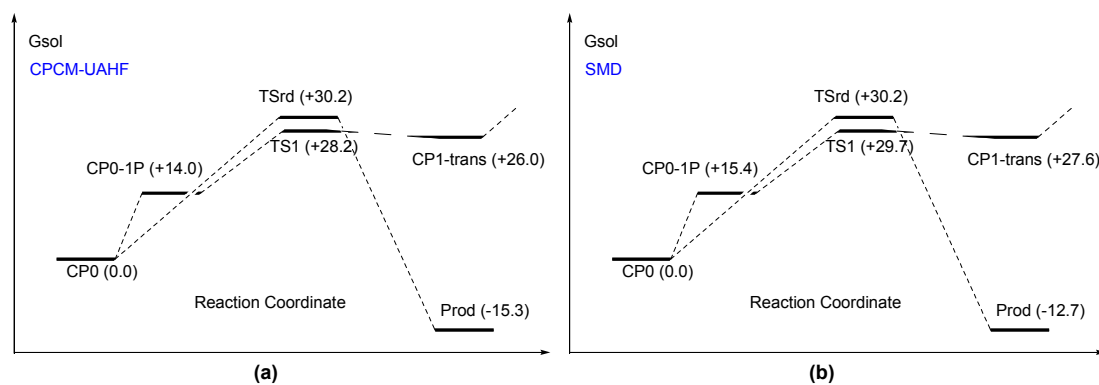

Figure S7. CPCM-UAHF and SMD solvation model effects on reaction profiles predicted by B97D method on B97D-optimized geometries.

As can be seen, there are very minor differences between CPCM-UAHF and SMD models, which essentially lead to the same conclusions.

## 1.2 Isomeric transition states for carbene insertion with bidentate phosphine

ligand

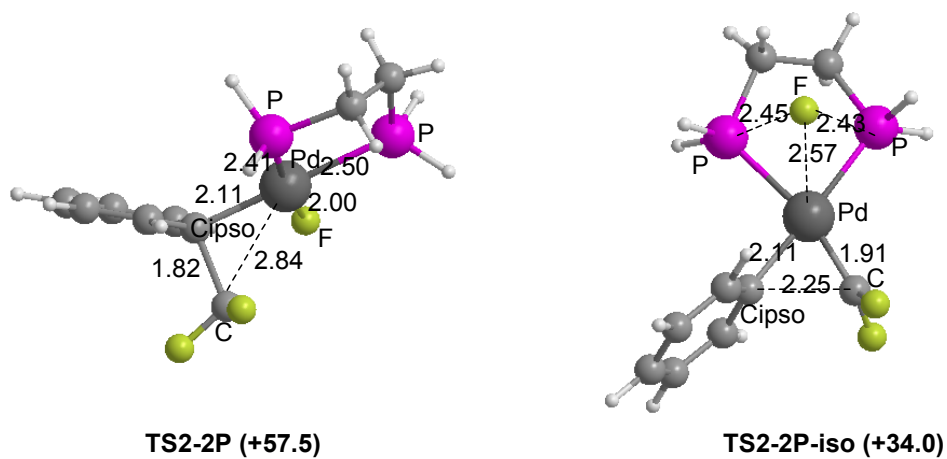

*Fig. S8* Isomeric transition states for carbene insertion with bidentate phosphine ligand. Values in parentheses are Gibbs free energies in kcal/mol.

As can be seen, these transition states with bidentate phosphine ligand are much less stable than those reported in the main text which feature mono-phosphine ligation.

### 1.3 Side pathways with CP1 intermediates from $\alpha$ -Fluoride elimination

(B3LYP/CPCM-UAHF results)

#### (a) Reductive elimination of Ph-F from CP1 intermediates

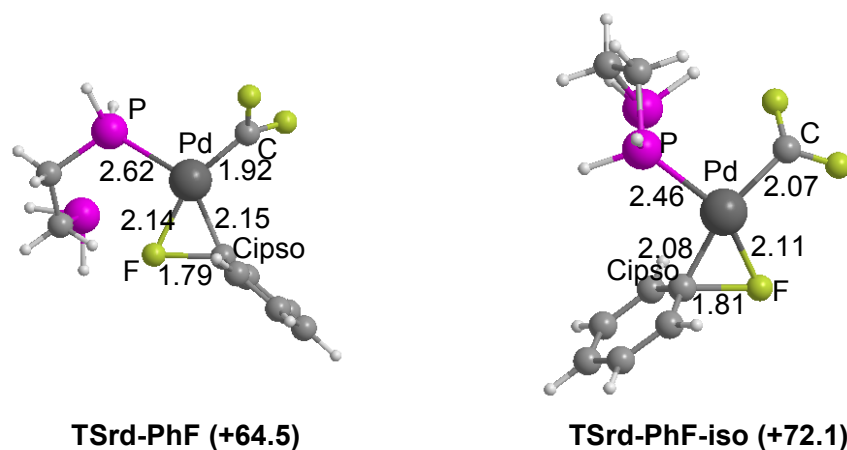

*Fig. S9* Optimized transition states for Ph-F coupling from CP1 intermediates. Values in parentheses are Gibbs free energies in kcal/mol.

#### (b) Reductive elimination of P-F products from CP1 intermediates

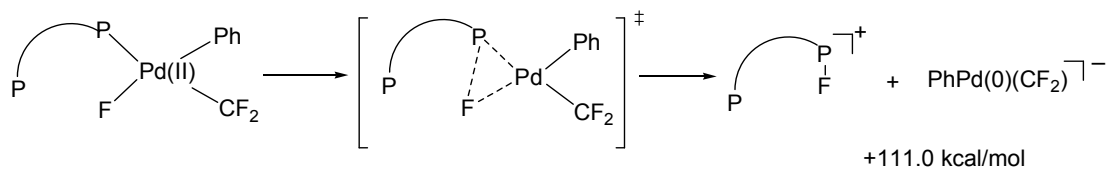

*Fig. S10* P-F coupling from CP1-trans intermediate.



(c) Self-dimerization of difluorocarbene in CP1 intermediates

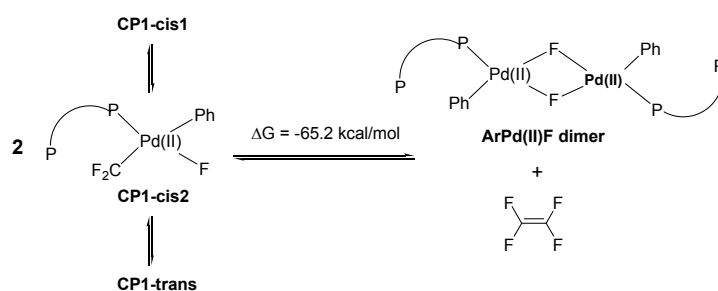

Fig. S11 self-dimerization of difluorocarbene in CP1 intermediates.

(d) Bimolecular disproportionation and transmetalation of CP1 intermediates

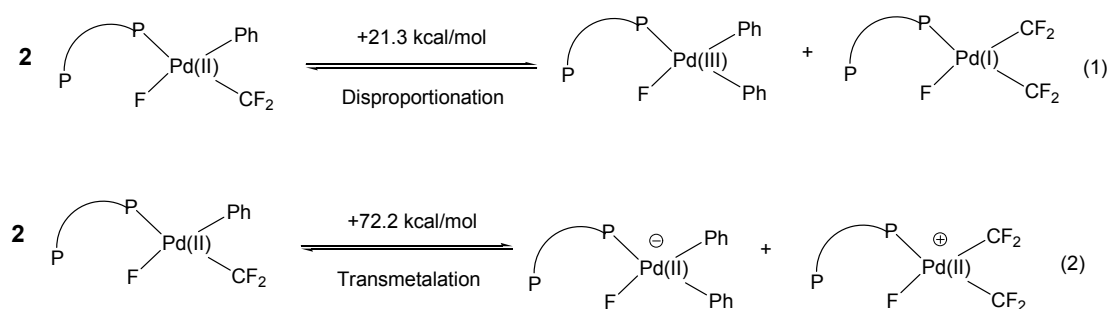

Fig. S12 Bimolecular disproportionation and transmetalation of CP1 intermediates.

## 1.4 Side pathways from complex CP0 (B3LYP/CPCM-UAHF results)

### (a) Bimolecular disproportionation mechanism

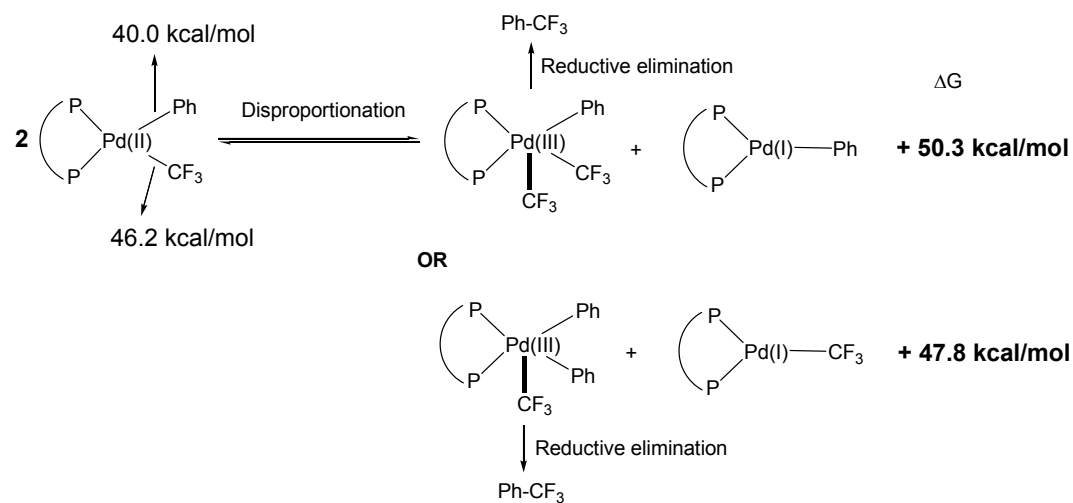

Fig. S13 Bimolecular disproportionation of CP0.

### (b) Bimolecular transmetalation mechanism

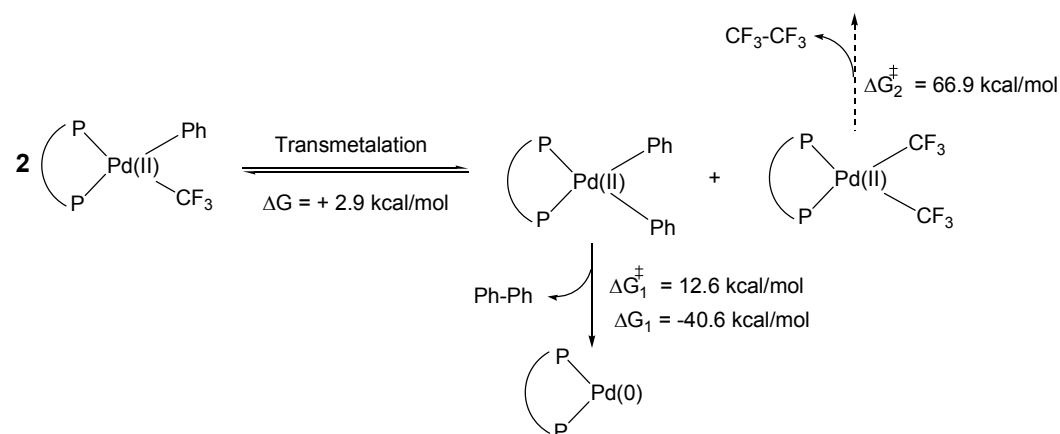

Fig. S14 Bimolecular transmetalation of CP0.

## 1.5 Reductive elimination from Pd(II) complex with Brettphos ligand

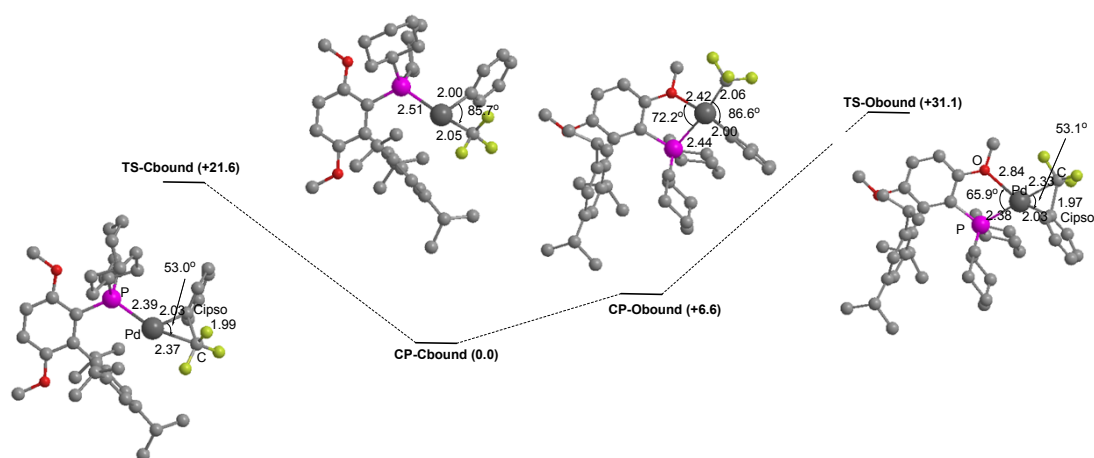

*Fig. S15* Optimized structures and relative free energies for intermediates and transition states with Brettphos ligand using B97D functional. Values in parentheses are Gibbs free energies in kcal/mol. Values above the bonds or arrows are bond lengths in Å or angles in degree (°).

As can be seen, when Buchwald's Brettphos is used, C-bound precomplex **CP-Cbound** is more stable than O-bound one by 6.6 kcal/mol. Furthermore, the C-bound transition state **TS-Cbound** for reductive elimination of Ar-CF<sub>3</sub> from C-bound precomplex is much more stable than from O-bound isomer by 9.5 kcal/mol. Therefore, C-bound geometry should be more favorable for reductive elimination to occur for Brettphos ligand.

## 1.6 Reductive elimination from Pd(II) with P,O and P,N-donating ligands

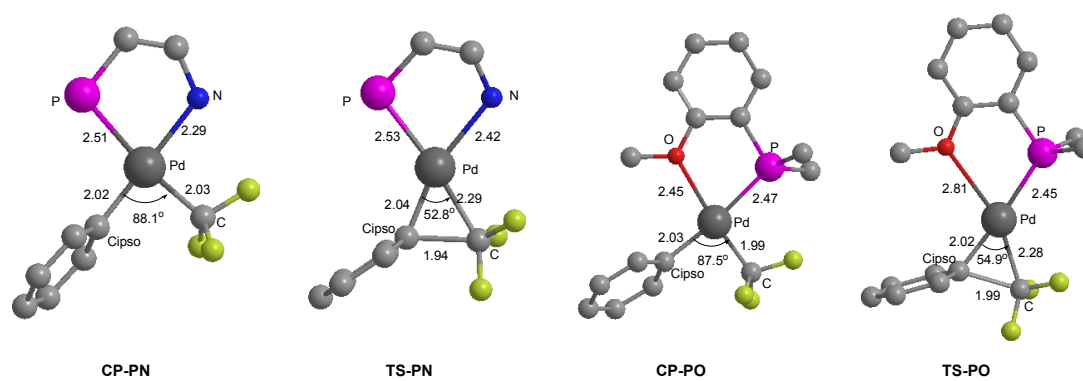

*Fig. S16* Optimized pre-complexes and transition states. Hydrogen atoms are omitted for clarity. Values above the bonds or arrows are bond lengths in Å or angles in degree (°).

## 1.7 Electronic effect of the substituents on the aryl ligand (B3LYP/CPCM-UAHF

results)

**Table S1** Substituents effect of the aryl ligand for direct reductive elimination of Ar-  
CF<sub>3</sub>

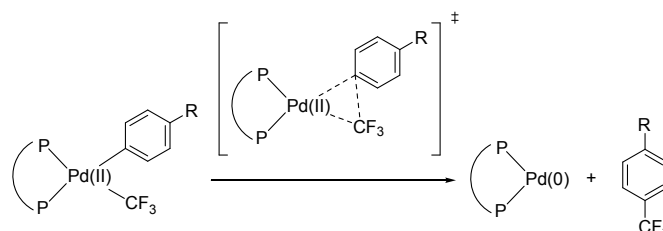

| Entry | R =                        | $\Delta G^\ddagger$ (kcal/mol) |
|-------|----------------------------|--------------------------------|
| 1     | H                          | 33.5                           |
| 2     | <i>p</i> -Me               | 32.3                           |
| 3     | <i>p</i> -OMe              | 33.7                           |
| 4     | <i>p</i> -NMe <sub>2</sub> | 32.0                           |
| 5     | <i>p</i> -Cl               | 34.6                           |
| 6     | <i>p</i> -Ac               | 33.6                           |
| 7     | <i>p</i> -CF <sub>3</sub>  | 34.4                           |
| 8     | <i>p</i> -NO <sub>2</sub>  | 33.8                           |
| 9     | <i>o</i> -Me               | 32.9                           |
| 10    | <i>o</i> -OMe              | 34.8                           |

## 2. Computed Energies for Relevant Stationary Points

**Table S2.** Single Point Electronic Energies Corrected by Solvation Energies in Benzene predicted by B97D-SMD method, Zero-Point Vibrational Energies, and Thermal Corrections to Enthalpies and Gibbs Free Energies <sup>a</sup>

| Complex                           | SP (a.u.)    | ZPE (a.u.) | $\Delta H$ (a.u.) | $\Delta G$ (a.u.) |
|-----------------------------------|--------------|------------|-------------------|-------------------|
| <b>CP0</b>                        | -1461.036232 | 0.1974     | 0.21628           | 0.148859          |
| <b>TSrd</b>                       | -1460.985269 | 0.195599   | 0.214173          | 0.147323          |
| <b>Prod</b>                       | -1461.058823 | 0.198264   | 0.216844          | 0.15033           |
| <b>CP0-1P</b>                     | -1461.007978 | 0.196436   | 0.216156          | 0.143535          |
| <b>CP0-1P'</b>                    | -1461.006631 | 0.196765   | 0.216371          | 0.145699          |
| <b>TSrd-1P</b>                    | -1460.973277 | 0.195787   | 0.214838          | 0.144524          |
| <b>CP0-1P-iso</b>                 | -1461.002974 | 0.196532   | 0.216097          | 0.144721          |
| <b>TS1</b>                        | -1460.984114 | 0.195461   | 0.214802          | 0.144069          |
| <b>CP1-trans</b>                  | -1460.987981 | 0.195564   | 0.215696          | 0.142469          |
| <b>TS1-iso</b>                    | -1460.974196 | 0.195342   | 0.214599          | 0.144993          |
| <b>CP1-cis1</b>                   | -1460.986774 | 0.195779   | 0.215786          | 0.142534          |
| <b>CP1-cis2</b>                   | -1460.975998 | 0.195692   | 0.215663          | 0.144193          |
| <b>TS2-1P</b>                     | -1460.982621 | 0.195217   | 0.214495          | 0.145492          |
| <b>TS2-1P-iso</b>                 | -1460.984709 | 0.195066   | 0.214505          | 0.143918          |
| <b>CP2</b>                        | -1461.019593 | 0.197417   | 0.216866          | 0.146903          |
| <b>TS3</b>                        | -1460.987034 | 0.196628   | 0.2153            | 0.148017          |
| <b>Prod'</b>                      | -1461.04568  | 0.198512   | 0.217603          | 0.147626          |
| <b>TS2-2P</b>                     | -1460.941463 | 0.193761   | 0.212847          | 0.145759          |
| <b>TS2-2P-iso</b>                 | -1460.98331  | 0.196787   | 0.215164          | 0.150034          |
| Ligands effect                    |              |            |                   |                   |
| <b>PH<sub>3</sub>-CP</b>          | -1040.452531 | 0.129864   | 0.144932          | 0.085982          |
| <b>PH<sub>3</sub>-TS</b>          | -1040.420293 | 0.128962   | 0.143492          | 0.084919          |
| <b>PP-CP</b>                      | -1459.79851  | 0.173458   | 0.191925          | 0.12533           |
| <b>PP-TS</b>                      | -1459.737894 | 0.171814   | 0.190393          | 0.121543          |
| <b>PN-CP</b>                      | -1173.181661 | 0.183791   | 0.201524          | 0.136345          |
| <b>PN-TS</b>                      | -1173.124514 | 0.181564   | 0.199195          | 0.134549          |
| <b>PO-CP</b>                      | -1232.316649 | 0.199021   | 0.218434          | 0.149342          |
| <b>PO-TS</b>                      | -1232.271685 | 0.197547   | 0.216796          | 0.146323          |
| <b>TS<sub>a-F</sub>-PO</b>        | -1232.282103 | 0.197274   | 0.216702          | 0.146004          |
| <b>PObenzene-CP</b>               | -1464.509102 | 0.305988   | 0.331164          | 0.248742          |
| <b>PObenzene-TS</b>               | -1464.460517 | 0.304426   | 0.329374          | 0.24422           |
| <b>TS<sub>a-F</sub>-PObenzene</b> | -1464.477241 | 0.304568   | 0.329594          | 0.248455          |

|                                                                                                                |              |          |          |          |
|----------------------------------------------------------------------------------------------------------------|--------------|----------|----------|----------|
| <b>Xantphos-CP(B97D-opt)<sup>b</sup></b>                                                                       | -2288.43045  | 0.68472  | 0.733975 | 0.601051 |
| <b>Xantphos-TS(B97D-opt)<sup>b</sup></b>                                                                       | -2288.3828   | 0.681332 | 0.731179 | 0.592033 |
| <b>Xantphos-CP</b>                                                                                             | -2959.959354 | 0.701943 | 0.750887 | 0.615175 |
| <b>Xantphos-TS</b>                                                                                             | -2959.921941 | 0.700641 | 0.749177 | 0.614299 |
| <b>TS<sub>a-F</sub>-Xantphos</b>                                                                               | -2959.916656 | 0.700126 | 0.749276 | 0.611935 |
| <b>OO-CP</b>                                                                                                   | -927.4980473 | 0.191891 | 0.209225 | 0.145393 |
| <b>OO-TS</b>                                                                                                   | -927.4438172 | 0.190429 | 0.207461 | 0.144364 |
| <b>NN-CP</b>                                                                                                   | -887.8048673 | 0.219572 | 0.236511 | 0.174221 |
| <b>NN-TS</b>                                                                                                   | -887.7358223 | 0.216929 | 0.23395  | 0.171104 |
| <b>ON-CP</b>                                                                                                   | -907.6507735 | 0.205675 | 0.222888 | 0.15778  |
| <b>ON-TS</b>                                                                                                   | -907.5926762 | 0.203649 | 0.220845 | 0.156796 |
| <b>CP-Obound(B97D-opt)<sup>b</sup></b>                                                                         | -2217.50616  | 0.901296 | 0.955507 | 0.813123 |
| <b>TS-Obound(B97D-opt)<sup>b</sup></b>                                                                         | -2217.46491  | 0.898998 | 0.953062 | 0.810956 |
| <b>CP-Cbound(B97D-opt)<sup>b</sup></b>                                                                         | -2217.51828  | 0.900926 | 0.955184 | 0.81474  |
| <b>TS-Cbound(B97D-opt)<sup>b</sup></b>                                                                         | -2217.48192  | 0.898993 | 0.952853 | 0.812767 |
| <b>CP-Obound</b>                                                                                               | -2554.170452 | 0.922827 | 0.97693  | 0.833287 |
| <b>TS-Obound</b>                                                                                               | -2554.118933 | 0.921103 | 0.974938 | 0.830955 |
| <b>CP-Cbound</b>                                                                                               | -2554.176686 | 0.922461 | 0.976746 | 0.833671 |
| <b>TS-Cbound</b>                                                                                               | -2554.133365 | 0.921256 | 0.974987 | 0.832201 |
| <b>TS<sub>a-F</sub>-Brettphos</b>                                                                              | -2554.131182 | 0.921793 | 0.975594 | 0.834533 |
| <b>PMe<sub>2</sub>CH<sub>2</sub>CH<sub>2</sub>PMe<sub>2</sub>-CP</b>                                           | -1618.27569  | 0.315981 | 0.341533 | 0.260412 |
| <b>PMe<sub>2</sub>CH<sub>2</sub>CH<sub>2</sub>PMe<sub>2</sub>-TS</b>                                           | -1618.21349  | 0.313664 | 0.339234 | 0.25593  |
| <b>P(CF<sub>3</sub>)<sub>2</sub>CH<sub>2</sub>CH<sub>2</sub>P(CF<sub>3</sub>)<sub>2</sub>-CP</b>               | -2808.91123  | 0.222657 | 0.257059 | 0.149186 |
| <b>P(CF<sub>3</sub>)<sub>2</sub>CH<sub>2</sub>CH<sub>2</sub>P(CF<sub>3</sub>)<sub>2</sub>-TS</b>               | -2808.87232  | 0.221661 | 0.255487 | 0.148956 |
| <b>TS<sub>a-F</sub>-P(CF<sub>3</sub>)<sub>2</sub>CH<sub>2</sub>CH<sub>2</sub>P(CF<sub>3</sub>)<sub>2</sub></b> | -2808.86297  | 0.221083 | 0.255698 | 0.146769 |

Note: a. SP: Single point electronic energy corrected by solvation energy in benzene predicted by B97D-SMD method;

ZPE: Zero-point vibrational energy;

ΔH: Thermal correction to enthalpy at 298.15 K;

ΔG: Thermal correction to Gibbs free energy at 298.15 K.

b. The geometries and energies are obtained by using B97D functional for geometry optimization.

### 3. Cartesian Coordinates of Relevant Stationary Points

Direct reductive elimination mechanism:

**CP0**

SCF Done: E(RB+HF-LYP) = -790.001210656 A.U.

| Center Number | Atomic Number | Atomic Type | Coordinates (Angstroms) |           |           |
|---------------|---------------|-------------|-------------------------|-----------|-----------|
|               |               |             | X                       | Y         | Z         |
| 1             | 6             | 0           | -2.199729               | -1.088280 | -1.090319 |
| 2             | 6             | 0           | -1.642357               | -0.416362 | 0.007857  |
| 3             | 6             | 0           | -2.442353               | -0.207112 | 1.139372  |
| 4             | 6             | 0           | -3.758458               | -0.680669 | 1.181436  |
| 5             | 6             | 0           | -4.301603               | -1.355022 | 0.086592  |
| 6             | 6             | 0           | -3.518784               | -1.553323 | -1.052194 |
| 7             | 46            | 0           | 0.315768                | 0.142793  | -0.021044 |
| 8             | 15            | 0           | 2.788532                | 0.679628  | 0.002612  |
| 9             | 6             | 0           | 3.742951                | -0.924530 | 0.433416  |
| 10            | 6             | 0           | 3.096809                | -2.149934 | -0.224255 |
| 11            | 15            | 0           | 1.211429                | -2.210104 | 0.121939  |
| 12            | 6             | 0           | -0.352143               | 2.066598  | -0.130361 |
| 13            | 9             | 0           | -0.963354               | 2.499672  | 1.008387  |
| 14            | 9             | 0           | 0.709095                | 2.935461  | -0.313996 |
| 15            | 9             | 0           | -1.204056               | 2.339959  | -1.149116 |
| 16            | 1             | 0           | -2.050072               | 0.343762  | 1.989046  |
| 17            | 1             | 0           | -4.362742               | -0.510058 | 2.070073  |
| 18            | 1             | 0           | -5.326647               | -1.716274 | 0.117436  |
| 19            | 1             | 0           | -3.933616               | -2.068089 | -1.916559 |
| 20            | 1             | 0           | -1.610833               | -1.251019 | -1.990576 |
| 21            | 1             | 0           | 4.792623                | -0.840035 | 0.136730  |
| 22            | 1             | 0           | 3.715330                | -1.015106 | 1.524941  |
| 23            | 1             | 0           | 3.578333                | -3.070532 | 0.118500  |
| 24            | 1             | 0           | 3.205342                | -2.104723 | -1.313545 |
| 25            | 1             | 0           | 1.182442                | -2.904186 | 1.377880  |
| 26            | 1             | 0           | 0.810093                | -3.298303 | -0.720090 |
| 27            | 1             | 0           | 3.449577                | 1.083787  | -1.205479 |
| 28            | 1             | 0           | 3.404266                | 1.615391  | 0.894650  |

**TSrd**

SCF Done: E(RB+HF-LYP) = -789.958720680 A.U.

| Center Number | Atomic Number | Atomic Type | Coordinates (Angstroms) |           |           |
|---------------|---------------|-------------|-------------------------|-----------|-----------|
|               |               |             | X                       | Y         | Z         |
| 1             | 6             | 0           | 1.236313                | 1.749831  | -0.024530 |
| 2             | 6             | 0           | 1.621994                | -0.195094 | -0.028271 |
| 3             | 9             | 0           | 1.051641                | 2.222304  | 1.238877  |
| 4             | 9             | 0           | 2.522636                | 2.061997  | -0.337200 |
| 5             | 9             | 0           | 0.517233                | 2.554971  | -0.877697 |
| 6             | 6             | 0           | 2.190348                | -0.684632 | -1.218949 |
| 7             | 6             | 0           | 3.226887                | -1.615486 | -1.166991 |
| 8             | 6             | 0           | 3.738618                | -2.039084 | 0.064506  |
| 9             | 6             | 0           | 3.212729                | -1.513918 | 1.246725  |
| 10            | 6             | 0           | 2.173069                | -0.581894 | 1.204896  |
| 11            | 1             | 0           | 1.815207                | -0.343181 | -2.179864 |
| 12            | 1             | 0           | 3.643660                | -2.006670 | -2.092306 |
| 13            | 1             | 0           | 4.555278                | -2.755207 | 0.099449  |
| 14            | 1             | 0           | 3.618938                | -1.821359 | 2.207623  |
| 15            | 1             | 0           | 1.789003                | -0.152271 | 2.125425  |
| 16            | 46            | 0           | -0.412630               | 0.153405  | -0.032631 |
| 17            | 15            | 0           | -1.675369               | -2.047358 | -0.104461 |
| 18            | 15            | 0           | -2.743391               | 1.124605  | 0.095179  |
| 19            | 6             | 0           | -3.957549               | -0.319273 | -0.274218 |
| 20            | 1             | 0           | -4.964647               | -0.062127 | 0.067219  |
| 21            | 1             | 0           | -3.993139               | -0.419050 | -1.364931 |
| 22            | 6             | 0           | -3.491589               | -1.628043 | 0.370568  |
| 23            | 1             | 0           | -4.155285               | -2.450290 | 0.087071  |
| 24            | 1             | 0           | -3.511712               | -1.547108 | 1.463200  |
| 25            | 1             | 0           | -1.921348               | -2.736046 | -1.348430 |
| 26            | 1             | 0           | -1.506016               | -3.229691 | 0.703036  |
| 27            | 1             | 0           | -3.294872               | 1.579969  | 1.345865  |
| 28            | 1             | 0           | -3.341220               | 2.139808  | -0.731327 |

**Prod**

SCF Done: E(RB+HF-LYP) = -790.037431038 A.U.

| Center Number | Atomic Number | Atomic Type | Coordinates (Angstroms) |           |           |
|---------------|---------------|-------------|-------------------------|-----------|-----------|
|               |               |             | X                       | Y         | Z         |
| 1             | 6             | 0           | -2.164853               | -1.363861 | -0.468419 |
| 2             | 6             | 0           | -1.821374               | 0.009027  | 0.042873  |
| 3             | 9             | 0           | -1.830929               | -2.338438 | 0.412234  |
| 4             | 9             | 0           | -3.500611               | -1.494429 | -0.683466 |



|    |    |   |           |           |           |
|----|----|---|-----------|-----------|-----------|
| 5  | 9  | 0 | -1.561177 | -1.653672 | -1.645715 |
| 6  | 6  | 0 | -1.540043 | 1.069361  | -0.879058 |
| 7  | 6  | 0 | -1.713189 | 2.417541  | -0.453772 |
| 8  | 6  | 0 | -2.126326 | 2.709774  | 0.829397  |
| 9  | 6  | 0 | -2.397709 | 1.661888  | 1.744713  |
| 10 | 6  | 0 | -2.264951 | 0.345728  | 1.361708  |
| 11 | 1  | 0 | -1.462192 | 0.853173  | -1.940721 |
| 12 | 1  | 0 | -1.533363 | 3.215714  | -1.169505 |
| 13 | 1  | 0 | -2.260495 | 3.743059  | 1.137845  |
| 14 | 1  | 0 | -2.731732 | 1.898802  | 2.751365  |
| 15 | 1  | 0 | -2.508861 | -0.458758 | 2.049367  |
| 16 | 46 | 0 | 0.410912  | 0.211042  | -0.142585 |
| 17 | 15 | 0 | 2.559104  | 1.193194  | -0.915463 |
| 18 | 15 | 0 | 1.827832  | -1.420622 | 1.078347  |
| 19 | 6  | 0 | 3.611874  | -1.130355 | 0.414286  |
| 20 | 1  | 0 | 4.344092  | -1.557447 | 1.106205  |
| 21 | 1  | 0 | 3.682391  | -1.686693 | -0.527273 |
| 22 | 6  | 0 | 3.902598  | 0.354395  | 0.182475  |
| 23 | 1  | 0 | 4.889192  | 0.482904  | -0.272946 |
| 24 | 1  | 0 | 3.901511  | 0.899705  | 1.133048  |
| 25 | 1  | 0 | 3.104561  | 0.871428  | -2.213305 |
| 26 | 1  | 0 | 3.071899  | 2.542473  | -0.863093 |
| 27 | 1  | 0 | 2.093620  | -1.301069 | 2.492554  |
| 28 | 1  | 0 | 1.821658  | -2.861934 | 1.039413  |

monoP-ligation pathway of 1,2-bisphosphine ligand:

**CP0-1P**

SCF Done: E(RB+HF-LYP) = -789.982177196 A.U.

| Center Number | Atomic Number | Atomic Type | Coordinates (Angstroms) |           |           |
|---------------|---------------|-------------|-------------------------|-----------|-----------|
|               |               |             | X                       | Y         | Z         |
| 1             | 6             | 0           | 2.334753                | -2.807572 | 1.124793  |
| 2             | 6             | 0           | 1.398219                | -1.775183 | 0.996896  |
| 3             | 6             | 0           | 1.586798                | -0.779237 | 0.030985  |
| 4             | 6             | 0           | 2.722199                | -0.802834 | -0.784723 |
| 5             | 6             | 0           | 3.647027                | -1.845566 | -0.656616 |
| 6             | 6             | 0           | 3.456826                | -2.848404 | 0.295576  |
| 7             | 46            | 0           | 0.146008                | 0.593700  | -0.223413 |
| 8             | 6             | 0           | 1.431041                | 2.034656  | 0.313123  |
| 9             | 9             | 0           | 2.467775                | 2.287702  | -0.525415 |
| 10            | 15            | 0           | -1.643549               | -1.019575 | -1.008150 |
| 11            | 6             | 0           | -3.424258               | -0.456756 | -1.419740 |
| 12            | 6             | 0           | -4.092388               | 0.343148  | -0.298313 |
| 13            | 15            | 0           | -4.406229               | -0.703852 | 1.292562  |
| 14            | 9             | 0           | 0.606055                | 3.148886  | 0.239894  |
| 15            | 9             | 0           | 1.939623                | 2.027097  | 1.563653  |
| 16            | 1             | 0           | 2.899110                | -0.012011 | -1.505506 |
| 17            | 1             | 0           | 4.524046                | -1.862953 | -1.299547 |
| 18            | 1             | 0           | 4.182014                | -3.651673 | 0.396481  |
| 19            | 1             | 0           | 2.183417                | -3.576396 | 1.879106  |
| 20            | 1             | 0           | 0.533493                | -1.754894 | 1.654603  |
| 21            | 1             | 0           | -5.034655               | 0.761858  | -0.664723 |
| 22            | 1             | 0           | -3.455517               | 1.182262  | 0.002585  |
| 23            | 1             | 0           | -3.332193               | 0.171994  | -2.312336 |
| 24            | 1             | 0           | -4.019746               | -1.332122 | -1.699526 |
| 25            | 1             | 0           | -1.325973               | -1.716572 | -2.219485 |
| 26            | 1             | 0           | -1.877131               | -2.159747 | -0.175673 |
| 27            | 1             | 0           | -5.602205               | -1.372909 | 0.820789  |
| 28            | 1             | 0           | -5.126746               | 0.317668  | 2.018982  |

**CP0-1P'**

SCF Done: E(RB+HF-LYP) = -789.984651344 A.U.

| Center Number | Atomic Number | Atomic Type | Coordinates (Angstroms) |           |           |
|---------------|---------------|-------------|-------------------------|-----------|-----------|
|               |               |             | X                       | Y         | Z         |
| 1             | 6             | 0           | 3.854419                | 1.645102  | -1.163706 |
| 2             | 6             | 0           | 4.892399                | 0.714414  | -1.071137 |
| 3             | 6             | 0           | 4.634709                | -0.561752 | -0.568532 |
| 4             | 6             | 0           | 3.340927                | -0.907193 | -0.161047 |
| 5             | 6             | 0           | 2.288898                | 0.015480  | -0.278181 |
| 6             | 6             | 0           | 2.560671                | 1.303502  | -0.759906 |
| 7             | 46            | 0           | 0.459041                | -0.747301 | 0.000441  |
| 8             | 6             | 0           | 0.075415                | 0.701953  | 1.331071  |
| 9             | 9             | 0           | 1.003197                | 0.927694  | 2.277504  |
| 10            | 15            | 0           | -1.816012               | -1.914995 | -0.016101 |
| 11            | 6             | 0           | -3.266161               | -0.957020 | -0.813536 |
| 12            | 6             | 0           | -3.472721               | 0.415664  | -0.176417 |
| 13            | 15            | 0           | -4.967314               | 1.320054  | -0.998230 |
| 14            | 9             | 0           | -0.179706               | 1.897481  | 0.728876  |
| 15            | 9             | 0           | -1.076345               | 0.379536  | 2.004747  |
| 16            | 1             | 0           | -3.722635               | 0.315278  | 0.884529  |
| 17            | 1             | 0           | 1.766901                | 2.041307  | -0.820576 |

|    |   |   |           |           |           |
|----|---|---|-----------|-----------|-----------|
| 18 | 1 | 0 | 4.052342  | 2.643327  | -1.547724 |
| 19 | 1 | 0 | 5.898699  | 0.986093  | -1.379708 |
| 20 | 1 | 0 | 5.440044  | -1.287243 | -0.478466 |
| 21 | 1 | 0 | 3.164662  | -1.900431 | 0.248776  |
| 22 | 1 | 0 | -2.567538 | 1.023052  | -0.242127 |
| 23 | 1 | 0 | -3.006542 | -0.862087 | -1.873641 |
| 24 | 1 | 0 | -4.170874 | -1.568449 | -0.744253 |
| 25 | 1 | 0 | -1.969537 | -3.186785 | -0.666720 |
| 26 | 1 | 0 | -2.386697 | -2.271988 | 1.249294  |
| 27 | 1 | 0 | -4.758698 | 2.598019  | -0.350206 |
| 28 | 1 | 0 | -4.281791 | 1.706547  | -2.216273 |

**TSrd-1P**

SCF Done: E(RB+HF-LYP) = -789.954729179 A.U.

| Center Number | Atomic Number | Atomic Type | Coordinates (Angstroms) |           |           |
|---------------|---------------|-------------|-------------------------|-----------|-----------|
|               |               |             | X                       | Y         | Z         |
| 1             | 6             | 0           | 4.022481                | 2.253941  | -0.329740 |
| 2             | 6             | 0           | 4.055517                | 1.044052  | -1.026109 |
| 3             | 6             | 0           | 3.055759                | 0.087906  | -0.824529 |
| 4             | 6             | 0           | 1.999421                | 0.367984  | 0.054073  |
| 5             | 6             | 0           | 1.990457                | 1.562984  | 0.793122  |
| 6             | 6             | 0           | 2.991200                | 2.511488  | 0.579367  |
| 7             | 46            | 0           | 0.182728                | -0.257465 | -0.557079 |
| 8             | 15            | 0           | -2.001426               | -0.888990 | -1.457617 |
| 9             | 6             | 0           | -3.539624               | 0.156636  | -1.013791 |
| 10            | 6             | 0           | -3.713864               | 0.280203  | 0.497999  |
| 11            | 1             | 0           | -3.857523               | -0.706518 | 0.951739  |
| 12            | 6             | 0           | 1.384042                | -1.295189 | 1.060682  |
| 13            | 9             | 0           | 2.127494                | -0.967005 | 2.146231  |
| 14            | 9             | 0           | 0.247975                | -1.830709 | 1.619821  |
| 15            | 9             | 0           | 2.019034                | -2.317579 | 0.441066  |
| 16            | 1             | 0           | 1.211043                | 1.745570  | 1.526844  |
| 17            | 1             | 0           | 2.974205                | 3.446652  | 1.133431  |
| 18            | 1             | 0           | 4.808475                | 2.989053  | -0.480684 |
| 19            | 1             | 0           | 4.865840                | 0.836333  | -1.720356 |
| 20            | 1             | 0           | 3.095871                | -0.865834 | -1.340394 |
| 21            | 15            | 0           | -5.295577               | 1.300874  | 0.925946  |
| 22            | 1             | 0           | -2.826408               | 0.728297  | 0.954187  |
| 23            | 1             | 0           | -3.377368               | 1.139113  | -1.470225 |
| 24            | 1             | 0           | -4.421954               | -0.290327 | -1.481928 |
| 25            | 1             | 0           | -2.171340               | -0.976076 | -2.882880 |
| 26            | 1             | 0           | -2.497740               | -2.199006 | -1.137986 |
| 27            | 1             | 0           | -5.027618               | 1.432710  | 2.343536  |
| 28            | 1             | 0           | -4.748811               | 2.602781  | 0.594916  |

**Prod'**

SCF Done: E(RB+HF-LYP) = -790.032608075 A.U.

| Center Number | Atomic Number | Atomic Type | Coordinates (Angstroms) |           |           |
|---------------|---------------|-------------|-------------------------|-----------|-----------|
|               |               |             | X                       | Y         | Z         |
| 1             | 6             | 0           | -2.168925               | -0.065345 | -1.022015 |
| 2             | 6             | 0           | -1.773677               | 0.701705  | 0.110318  |
| 3             | 6             | 0           | -2.325445               | 0.408273  | 1.381926  |
| 4             | 6             | 0           | -3.232909               | -0.630578 | 1.528743  |
| 5             | 6             | 0           | -3.599298               | -1.416104 | 0.422001  |
| 6             | 6             | 0           | -3.069847               | -1.143927 | -0.834688 |
| 7             | 6             | 0           | -1.069366               | 2.020487  | -0.067436 |
| 8             | 46            | 0           | -0.240625               | -0.971979 | -0.429514 |
| 9             | 15            | 0           | 1.926395                | -1.876767 | 0.021057  |
| 10            | 6             | 0           | 3.002734                | -0.954624 | 1.308227  |
| 11            | 6             | 0           | 3.080586                | 0.553916  | 1.067892  |
| 12            | 15            | 0           | 4.053170                | 1.010203  | -0.534743 |
| 13            | 9             | 0           | -0.413205               | 2.114181  | -1.242128 |
| 14            | 9             | 0           | -1.948558               | 3.052794  | -0.027610 |
| 15            | 9             | 0           | -0.171362               | 2.252975  | 0.924314  |
| 16            | 1             | 0           | -2.043409               | 1.020030  | 2.233311  |
| 17            | 1             | 0           | -3.656827               | -0.840134 | 2.506690  |
| 18            | 1             | 0           | -4.304962               | -2.232611 | 0.546536  |
| 19            | 1             | 0           | -3.377939               | -1.726845 | -1.697770 |
| 20            | 1             | 0           | -1.927921               | 0.275776  | -2.025157 |
| 21            | 1             | 0           | 3.544606                | 1.037506  | 1.933349  |
| 22            | 1             | 0           | 2.074050                | 0.967844  | 0.952579  |
| 23            | 1             | 0           | 2.518449                | -1.143849 | 2.272522  |
| 24            | 1             | 0           | 3.996713                | -1.413888 | 1.342829  |
| 25            | 1             | 0           | 2.078152                | -3.212640 | 0.536049  |
| 26            | 1             | 0           | 2.855525                | -2.001290 | -1.066565 |
| 27            | 1             | 0           | 5.382234                | 0.911848  | 0.038947  |
| 28            | 1             | 0           | 3.971637                | 2.445403  | -0.371350 |

**$\alpha$ -fluoride elimination mechanism:**

**CP0-1P-iso**

SCF Done: E(RB+HF-LYP) = -789.962495275 A.U.

| Center Number | Atomic Number | Atomic Type | Coordinates (Angstroms) |           |           |
|---------------|---------------|-------------|-------------------------|-----------|-----------|
|               |               |             | X                       | Y         | Z         |
| 1             | 6             | 0           | -4.848698               | -1.102977 | -0.222933 |
| 2             | 6             | 0           | -3.899099               | -1.523724 | -1.157132 |
| 3             | 6             | 0           | -2.570890               | -1.098761 | -1.045640 |
| 4             | 6             | 0           | -2.176967               | -0.224755 | -0.018298 |
| 5             | 6             | 0           | -3.137872               | 0.163211  | 0.931186  |
| 6             | 6             | 0           | -4.467191               | -0.259367 | 0.823027  |
| 7             | 46            | 0           | -0.367141               | 0.764846  | -0.094658 |
| 8             | 15            | 0           | 0.551608                | -0.988603 | 1.107081  |
| 9             | 6             | 0           | 2.421724                | -0.992591 | 1.439371  |
| 10            | 6             | 0           | 3.284610                | -1.112537 | 0.180988  |
| 11            | 15            | 0           | 3.083216                | -2.800870 | -0.728669 |
| 12            | 1             | 0           | -2.857479               | 0.813156  | 1.759819  |
| 13            | 1             | 0           | -5.201783               | 0.064491  | 1.557105  |
| 14            | 1             | 0           | -5.879312               | -1.439499 | -0.303580 |
| 15            | 1             | 0           | -4.190962               | -2.186173 | -1.969112 |
| 16            | 1             | 0           | -1.843170               | -1.445431 | -1.778468 |
| 17            | 1             | 0           | 4.331046                | -0.960670 | 0.461784  |
| 18            | 1             | 0           | 3.021130                | -0.325057 | -0.529541 |
| 19            | 1             | 0           | 2.620285                | -0.031947 | 1.922336  |
| 20            | 1             | 0           | 2.628098                | -1.793941 | 2.158173  |
| 21            | 1             | 0           | 0.007364                | -1.103806 | 2.421782  |
| 22            | 1             | 0           | 0.277041                | -2.287813 | 0.592560  |
| 23            | 1             | 0           | 3.979081                | -3.567384 | 0.113495  |
| 24            | 1             | 0           | 4.069363                | -2.553542 | -1.754942 |
| 25            | 6             | 0           | 1.307410                | 1.974299  | -0.279687 |
| 26            | 9             | 0           | 0.810634                | 3.233924  | -0.546007 |
| 27            | 9             | 0           | 2.155077                | 2.138301  | 0.791053  |
| 28            | 9             | 0           | 2.137320                | 1.687773  | -1.342672 |

**TS1**

SCF Done: E(RB+HF-LYP) = -789.944571388 A.U.

| Center Number | Atomic Number | Atomic Type | Coordinates (Angstroms) |           |           |
|---------------|---------------|-------------|-------------------------|-----------|-----------|
|               |               |             | X                       | Y         | Z         |
| 1             | 6             | 0           | 2.093034                | -1.106363 | 1.294976  |
| 2             | 6             | 0           | 1.816634                | -0.506704 | 0.058809  |
| 3             | 6             | 0           | 2.714803                | -0.693654 | -1.000584 |
| 4             | 6             | 0           | 3.865304                | -1.471456 | -0.828156 |
| 5             | 6             | 0           | 4.132172                | -2.069908 | 0.404702  |
| 6             | 6             | 0           | 3.243796                | -1.884289 | 1.465590  |
| 7             | 46            | 0           | 0.121477                | 0.593244  | -0.195001 |
| 8             | 15            | 0           | -1.035431               | -1.473427 | -0.815403 |
| 9             | 6             | 0           | -2.849542               | -1.276393 | -1.356126 |
| 10            | 6             | 0           | -3.651097               | -0.381023 | -0.406500 |
| 11            | 15            | 0           | -3.852323               | -1.140255 | 1.349421  |
| 12            | 9             | 0           | -1.549937               | 1.774390  | -0.423278 |
| 13            | 1             | 0           | 2.525370                | -0.234536 | -1.968418 |
| 14            | 1             | 0           | 4.552209                | -1.607092 | -1.660648 |
| 15            | 1             | 0           | 5.025732                | -2.674221 | 0.538111  |
| 16            | 1             | 0           | 3.443098                | -2.344102 | 2.431024  |
| 17            | 1             | 0           | 1.413813                | -0.972716 | 2.133933  |
| 18            | 1             | 0           | -4.633222               | -0.181194 | -0.846296 |
| 19            | 1             | 0           | -3.109642               | 0.565831  | -0.290668 |
| 20            | 1             | 0           | -2.801254               | -0.801399 | -2.342015 |
| 21            | 1             | 0           | -3.290263               | -2.271117 | -1.486030 |
| 22            | 1             | 0           | -0.477002               | -2.220254 | -1.900044 |
| 23            | 1             | 0           | -1.072211               | -2.499611 | 0.175686  |
| 24            | 1             | 0           | -5.012732               | -1.966431 | 1.078020  |
| 25            | 1             | 0           | -4.613768               | -0.053375 | 1.920307  |
| 26            | 6             | 0           | 0.818134                | 2.338990  | 0.268229  |
| 27            | 9             | 0           | 0.693687                | 2.910431  | 1.425807  |
| 28            | 9             | 0           | 1.153896                | 3.257514  | -0.583511 |

**TS1-iso**

SCF Done: E(RB+HF-LYP) = -789.926070583 A.U.

| Center Number | Atomic Number | Atomic Type | Coordinates (Angstroms) |           |           |
|---------------|---------------|-------------|-------------------------|-----------|-----------|
|               |               |             | X                       | Y         | Z         |
| 1             | 6             | 0           | -2.983006               | -2.542199 | -0.647516 |
| 2             | 6             | 0           | -1.830380               | -1.753475 | -0.546113 |
| 3             | 6             | 0           | -1.902510               | -0.451448 | -0.032522 |
| 4             | 6             | 0           | -3.150163               | 0.059968  | 0.352416  |
| 5             | 6             | 0           | -4.295026               | -0.736547 | 0.270801  |
| 6             | 6             | 0           | -4.214687               | -2.039755 | -0.227609 |
| 7             | 46            | 0           | -0.332972               | 0.839354  | 0.082147  |
| 8             | 6             | 0           | 1.035105                | 2.319425  | -0.198363 |

|    |    |   |           |           |           |
|----|----|---|-----------|-----------|-----------|
| 9  | 9  | 0 | 0.764955  | 3.582346  | -0.143644 |
| 10 | 15 | 0 | 0.914885  | -0.843264 | 1.254807  |
| 11 | 6  | 0 | 2.815807  | -0.788278 | 1.351303  |
| 12 | 6  | 0 | 3.513879  | -0.873569 | -0.008719 |
| 13 | 15 | 0 | 3.259157  | -2.574166 | -0.885210 |
| 14 | 9  | 0 | -1.544834 | 2.199270  | -0.679053 |
| 15 | 9  | 0 | 2.183948  | 2.215859  | -0.833938 |
| 16 | 1  | 0 | -3.226473 | 1.091028  | 0.681037  |
| 17 | 1  | 0 | -5.255651 | -0.331240 | 0.580986  |
| 18 | 1  | 0 | -5.108629 | -2.654576 | -0.298363 |
| 19 | 1  | 0 | -2.913065 | -3.547920 | -1.056182 |
| 20 | 1  | 0 | -0.885899 | -2.165460 | -0.894203 |
| 21 | 1  | 0 | 4.581919  | -0.676191 | 0.124417  |
| 22 | 1  | 0 | 3.119171  | -0.107577 | -0.681940 |
| 23 | 1  | 0 | 3.057100  | 0.167228  | 1.830320  |
| 24 | 1  | 0 | 3.148480  | -1.584198 | 2.026606  |
| 25 | 1  | 0 | 0.585161  | -0.881077 | 2.646485  |
| 26 | 1  | 0 | 0.645388  | -2.201054 | 0.911825  |
| 27 | 1  | 0 | 4.274154  | -3.299053 | -0.147619 |
| 28 | 1  | 0 | 4.113688  | -2.300747 | -2.018438 |

**CP1-trans**

SCF Done: E(RB+HF-LYP) = -789.946722306 A.U.

| Center Number | Atomic Number | Atomic Type | Coordinates (Angstroms) |           |           |
|---------------|---------------|-------------|-------------------------|-----------|-----------|
|               |               |             | X                       | Y         | Z         |
| 1             | 6             | 0           | 2.813045                | -2.301785 | 1.262263  |
| 2             | 6             | 0           | 1.806834                | -1.334710 | 1.165712  |
| 3             | 6             | 0           | 1.670016                | -0.566206 | 0.001762  |
| 4             | 6             | 0           | 2.575516                | -0.759478 | -1.050155 |
| 5             | 6             | 0           | 3.580882                | -1.727525 | -0.952518 |
| 6             | 6             | 0           | 3.700916                | -2.501695 | 0.203125  |
| 7             | 46            | 0           | 0.098350                | 0.760073  | -0.201256 |
| 8             | 6             | 0           | 1.430128                | 1.960086  | 0.483877  |
| 9             | 9             | 0           | 2.351436                | 2.564079  | -0.211306 |
| 10            | 15            | 0           | -1.330972               | -1.051932 | -1.061503 |
| 11            | 6             | 0           | -3.144340               | -0.557697 | -1.344527 |
| 12            | 6             | 0           | -3.808649               | 0.050639  | -0.107429 |
| 13            | 15            | 0           | -3.944185               | -1.165709 | 1.376214  |
| 14            | 9             | 0           | -1.529469               | 1.904588  | -0.487211 |
| 15            | 9             | 0           | 1.679196                | 2.196661  | 1.739874  |
| 16            | 1             | 0           | 2.499881                | -0.160845 | -1.954992 |
| 17            | 1             | 0           | 4.271854                | -1.871303 | -1.780013 |
| 18            | 1             | 0           | 4.484366                | -3.251057 | 0.280326  |
| 19            | 1             | 0           | 2.902315                | -2.896393 | 2.168451  |
| 20            | 1             | 0           | 1.124971                | -1.191736 | 2.000671  |
| 21            | 1             | 0           | -4.802562               | 0.416157  | -0.384214 |
| 22            | 1             | 0           | -3.195161               | 0.903146  | 0.198777  |
| 23            | 1             | 0           | -3.096105               | 0.209438  | -2.123177 |
| 24            | 1             | 0           | -3.687190               | -1.422535 | -1.741018 |
| 25            | 1             | 0           | -0.967227               | -1.570036 | -2.345864 |
| 26            | 1             | 0           | -1.398606               | -2.280872 | -0.336850 |
| 27            | 1             | 0           | -5.137262               | -1.868379 | 0.945676  |
| 28            | 1             | 0           | -4.652565               | -0.272061 | 2.264461  |

**CP1-cis2**

SCF Done: E(RB+HF-LYP) = -789.926538754 A.U.

| Center Number | Atomic Number | Atomic Type | Coordinates (Angstroms) |           |           |
|---------------|---------------|-------------|-------------------------|-----------|-----------|
|               |               |             | X                       | Y         | Z         |
| 1             | 6             | 0           | 4.228990                | 1.800986  | -0.093718 |
| 2             | 6             | 0           | 2.998881                | 2.423706  | -0.306079 |
| 3             | 6             | 0           | 1.814032                | 1.680508  | -0.245014 |
| 4             | 6             | 0           | 1.848274                | 0.302762  | 0.015096  |
| 5             | 6             | 0           | 3.092706                | -0.322417 | 0.187389  |
| 6             | 6             | 0           | 4.271811                | 0.426101  | 0.152005  |
| 7             | 46            | 0           | 0.225510                | -0.931466 | 0.075866  |
| 8             | 6             | 0           | -1.275190               | -2.285928 | -0.167959 |
| 9             | 9             | 0           | 1.326368                | -2.250414 | -0.882048 |
| 10            | 15            | 0           | -0.992208               | 0.662272  | 1.398729  |
| 11            | 6             | 0           | -2.842334               | 0.945150  | 1.041001  |
| 12            | 6             | 0           | -3.133476               | 1.338001  | -0.409599 |
| 13            | 15            | 0           | -2.423472               | 3.068878  | -0.881081 |
| 14            | 1             | 0           | 3.133939                | -1.398662 | 0.315058  |
| 15            | 1             | 0           | 5.228383                | -0.070522 | 0.299628  |
| 16            | 1             | 0           | 5.148806                | 2.379723  | -0.130106 |
| 17            | 1             | 0           | 2.954819                | 3.489452  | -0.519863 |
| 18            | 1             | 0           | 0.873230                | 2.194848  | -0.427475 |
| 19            | 1             | 0           | -4.214300               | 1.314843  | -0.578592 |
| 20            | 1             | 0           | -2.677402               | 0.613603  | -1.091693 |
| 21            | 1             | 0           | -3.331964               | -0.007483 | 1.267057  |
| 22            | 1             | 0           | -3.223467               | 1.688789  | 1.749110  |
| 23            | 1             | 0           | -1.038975               | 0.344430  | 2.793988  |

|    |   |   |           |           |           |
|----|---|---|-----------|-----------|-----------|
| 24 | 1 | 0 | -0.457390 | 1.981740  | 1.470243  |
| 25 | 1 | 0 | -3.509878 | 3.855704  | -0.333727 |
| 26 | 1 | 0 | -2.933413 | 3.091551  | -2.232942 |
| 27 | 9 | 0 | -2.575844 | -2.068102 | -0.231568 |
| 28 | 9 | 0 | -1.096390 | -3.509380 | -0.539047 |

**CP1-cis1**

SCF Done: E(RB+HF-LYP) = -789.947579084 A.U.

| Center Number | Atomic Number | Atomic Type | Coordinates (Angstroms) |           |           |
|---------------|---------------|-------------|-------------------------|-----------|-----------|
|               |               |             | X                       | Y         | Z         |
| 1             | 6             | 0           | -2.403266               | -0.888901 | -1.233732 |
| 2             | 6             | 0           | -1.853934               | -0.223051 | -0.133321 |
| 3             | 6             | 0           | -2.585509               | -0.119409 | 1.053642  |
| 4             | 6             | 0           | -3.869503               | -0.671052 | 1.134270  |
| 5             | 6             | 0           | -4.430105               | -1.312516 | 0.029654  |
| 6             | 6             | 0           | -3.694025               | -1.419922 | -1.152269 |
| 7             | 46            | 0           | 0.058649                | 0.416744  | -0.342356 |
| 8             | 15            | 0           | 2.575631                | 0.753466  | -0.893904 |
| 9             | 6             | 0           | 3.742747                | -0.613610 | -0.228888 |
| 10            | 6             | 0           | 2.989765                | -1.901481 | 0.119608  |
| 11            | 15            | 0           | 2.020666                | -1.732802 | 1.775214  |
| 12            | 6             | 0           | -0.334779               | 2.095102  | 0.465473  |
| 13            | 9             | 0           | 0.568456                | 3.024879  | 0.676837  |
| 14            | 9             | 0           | -1.471556               | 2.599758  | 0.849189  |
| 15            | 9             | 0           | 0.437148                | -1.253168 | -1.325948 |
| 16            | 1             | 0           | -2.168796               | 0.374159  | 1.925870  |
| 17            | 1             | 0           | -4.427755               | -0.594234 | 2.064508  |
| 18            | 1             | 0           | -5.431081               | -1.732004 | 0.090737  |
| 19            | 1             | 0           | -4.117621               | -1.929676 | -2.014650 |
| 20            | 1             | 0           | -1.815806               | -1.021778 | -2.135245 |
| 21            | 1             | 0           | 4.499938                | -0.803044 | -0.996083 |
| 22            | 1             | 0           | 4.259373                | -0.192785 | 0.640631  |
| 23            | 1             | 0           | 3.691630                | -2.738564 | 0.175281  |
| 24            | 1             | 0           | 2.227232                | -2.112586 | -0.634039 |
| 25            | 1             | 0           | 3.043932                | -2.286412 | 2.643877  |
| 26            | 1             | 0           | 1.274949                | -2.964869 | 1.667161  |
| 27            | 1             | 0           | 2.743157                | 0.592501  | -2.306338 |
| 28            | 1             | 0           | 3.403775                | 1.914910  | -0.720302 |

**TS2-1P**

SCF Done: E(RB+HF-LYP) = -789.944374816 A.U.

| Center Number | Atomic Number | Atomic Type | Coordinates (Angstroms) |           |           |
|---------------|---------------|-------------|-------------------------|-----------|-----------|
|               |               |             | X                       | Y         | Z         |
| 1             | 6             | 0           | -1.530572               | -1.680047 | 0.552353  |
| 2             | 6             | 0           | -1.803030               | 0.390632  | 0.029698  |
| 3             | 9             | 0           | -1.814336               | -1.793967 | 1.829021  |
| 4             | 9             | 0           | -2.437515               | -2.361969 | -0.108717 |
| 5             | 9             | 0           | 1.564057                | -1.931872 | -0.372712 |
| 6             | 6             | 0           | -2.670287               | 0.556810  | -1.060604 |
| 7             | 6             | 0           | -3.622977               | 1.577836  | -1.053473 |
| 8             | 6             | 0           | -3.733861               | 2.423068  | 0.053914  |
| 9             | 6             | 0           | -2.896932               | 2.240833  | 1.158166  |
| 10            | 6             | 0           | -1.943917               | 1.220130  | 1.152399  |
| 11            | 1             | 0           | -2.599376               | -0.107460 | -1.917812 |
| 12            | 1             | 0           | -4.282421               | 1.708596  | -1.907709 |
| 13            | 1             | 0           | -4.480266               | 3.212975  | 0.062088  |
| 14            | 1             | 0           | -2.989678               | 2.889045  | 2.025795  |
| 15            | 1             | 0           | -1.304757               | 1.076037  | 2.019280  |
| 16            | 46            | 0           | -0.042784               | -0.754491 | -0.198551 |
| 17            | 15            | 0           | 1.473533                | 0.948970  | -1.206981 |
| 18            | 15            | 0           | 3.893910                | 1.268202  | 1.390613  |
| 19            | 6             | 0           | 3.853389                | -0.092096 | 0.032117  |
| 20            | 1             | 0           | 4.860094                | -0.490432 | -0.129315 |
| 21            | 1             | 0           | 3.206797                | -0.904166 | 0.377003  |
| 22            | 6             | 0           | 3.290287                | 0.389080  | -1.306387 |
| 23            | 1             | 0           | 3.271065                | -0.460002 | -1.995791 |
| 24            | 1             | 0           | 3.884175                | 1.191548  | -1.756655 |
| 25            | 1             | 0           | 1.222569                | 1.288115  | -2.577882 |
| 26            | 1             | 0           | 1.549828                | 2.276256  | -0.677886 |
| 27            | 1             | 0           | 5.114920                | 1.928697  | 0.970586  |
| 28            | 1             | 0           | 4.541013                | 0.472577  | 2.409720  |

**TS2-1P-iso**

SCF Done: E(RB+HF-LYP) = -789.939588475 A.U.

| Center Number | Atomic Number | Atomic Type | Coordinates (Angstroms) |          |          |
|---------------|---------------|-------------|-------------------------|----------|----------|
|               |               |             | X                       | Y        | Z        |
| 1             | 6             | 0           | 2.627595                | 0.536432 | 1.364751 |
| 2             | 6             | 0           | 2.197360                | 0.041166 | 0.128420 |

|    |    |   |           |           |           |
|----|----|---|-----------|-----------|-----------|
| 3  | 6  | 0 | 3.137502  | -0.366351 | -0.824706 |
| 4  | 6  | 0 | 4.500796  | -0.327201 | -0.521292 |
| 5  | 6  | 0 | 4.928193  | 0.140592  | 0.723645  |
| 6  | 6  | 0 | 3.991486  | 0.573909  | 1.665099  |
| 7  | 46 | 0 | 0.182190  | -0.460196 | -0.124554 |
| 8  | 15 | 0 | -2.099107 | -1.355937 | -0.264461 |
| 9  | 6  | 0 | -3.645983 | -0.549407 | -1.023694 |
| 10 | 6  | 0 | -3.940503 | 0.854228  | -0.486606 |
| 11 | 15 | 0 | -4.495827 | 0.851281  | 1.362405  |
| 12 | 6  | 0 | 0.536007  | 1.282192  | -0.781934 |
| 13 | 9  | 0 | 0.918866  | 1.597721  | -1.998381 |
| 14 | 9  | 0 | 0.474929  | 2.405628  | -0.103066 |
| 15 | 1  | 0 | 2.811682  | -0.728725 | -1.795668 |
| 16 | 1  | 0 | 5.227801  | -0.659691 | -1.258138 |
| 17 | 1  | 0 | 5.989259  | 0.174837  | 0.956683  |
| 18 | 1  | 0 | 4.321272  | 0.943376  | 2.632946  |
| 19 | 1  | 0 | 1.904115  | 0.876239  | 2.100434  |
| 20 | 1  | 0 | -4.706833 | 1.329207  | -1.106628 |
| 21 | 1  | 0 | -3.039982 | 1.475668  | -0.540436 |
| 22 | 1  | 0 | -3.448078 | -0.491503 | -2.100184 |
| 23 | 1  | 0 | -4.504512 | -1.217300 | -0.890075 |
| 24 | 1  | 0 | -5.864928 | 0.439593  | 1.121841  |
| 25 | 1  | 0 | -4.816368 | 2.260394  | 1.435571  |
| 26 | 9  | 0 | 0.306629  | -2.269013 | 0.673864  |
| 27 | 1  | 0 | -2.086746 | -2.615529 | -0.934692 |
| 28 | 1  | 0 | -2.541930 | -1.770099 | 1.024825  |

**CP2**

SCF Done: E(RB+HF-LYP) = -789.990378476 A.U.

| Center Number | Atomic Number | Atomic Type | Coordinates (Angstroms) |           |           |
|---------------|---------------|-------------|-------------------------|-----------|-----------|
|               |               |             | X                       | Y         | Z         |
| 1             | 6             | 0           | 2.014172                | -0.662707 | 1.328430  |
| 2             | 6             | 0           | 2.381211                | 0.272781  | 0.328855  |
| 3             | 6             | 0           | 3.276729                | -0.115140 | -0.697775 |
| 4             | 6             | 0           | 3.827634                | -1.384858 | -0.685452 |
| 5             | 6             | 0           | 3.470934                | -2.309079 | 0.314960  |
| 6             | 6             | 0           | 2.568513                | -1.954611 | 1.308403  |
| 7             | 6             | 0           | 1.605973                | 1.529593  | 0.259704  |
| 8             | 46            | 0           | 0.129349                | 0.292604  | -0.230141 |
| 9             | 15            | 0           | -1.596573               | -1.527766 | -0.733223 |
| 10            | 6             | 0           | -3.279353               | -0.818745 | -1.294798 |
| 11            | 6             | 0           | -3.785158               | 0.308859  | -0.392475 |
| 12            | 15            | 0           | -4.153042               | -0.260766 | 1.407470  |
| 13            | 9             | 0           | 1.398272                | 2.169287  | 1.434316  |
| 14            | 9             | 0           | 2.022052                | 2.426580  | -0.652266 |
| 15            | 9             | 0           | -1.157760               | 1.682389  | -0.853877 |
| 16            | 1             | 0           | 3.530765                | 0.601515  | -1.471487 |
| 17            | 1             | 0           | 4.537622                | -1.671680 | -1.455956 |
| 18            | 1             | 0           | 3.908118                | -3.303584 | 0.308592  |
| 19            | 1             | 0           | 2.299445                | -2.663081 | 2.086269  |
| 20            | 1             | 0           | 1.394604                | -0.342178 | 2.160473  |
| 21            | 1             | 0           | -4.684600               | 0.746650  | -0.837197 |
| 22            | 1             | 0           | -3.003566               | 1.075393  | -0.346313 |
| 23            | 1             | 0           | -3.090554               | -0.411476 | -2.293538 |
| 24            | 1             | 0           | -3.996313               | -1.640642 | -1.394787 |
| 25            | 1             | 0           | -1.355141               | -2.462442 | -1.798152 |
| 26            | 1             | 0           | -1.985539               | -2.481469 | 0.264516  |
| 27            | 1             | 0           | -5.482916               | -0.794007 | 1.179719  |
| 28            | 1             | 0           | -4.624777               | 1.014355  | 1.897998  |

**TS3**

SCF Done: E(RB+HF-LYP) = -789.955157464 A.U.

| Center Number | Atomic Number | Atomic Type | Coordinates (Angstroms) |           |           |
|---------------|---------------|-------------|-------------------------|-----------|-----------|
|               |               |             | X                       | Y         | Z         |
| 1             | 6             | 0           | 1.250636                | 1.700041  | 0.089921  |
| 2             | 6             | 0           | 2.132121                | 0.556980  | 0.207835  |
| 3             | 9             | 0           | 0.741828                | 2.221393  | 1.193170  |
| 4             | 9             | 0           | 1.635319                | 2.633534  | -0.757351 |
| 5             | 9             | 0           | -0.501079               | 1.734094  | -0.887309 |
| 6             | 6             | 0           | 3.097351                | 0.275853  | -0.808002 |
| 7             | 6             | 0           | 3.903058                | -0.837346 | -0.701166 |
| 8             | 6             | 0           | 3.762767                | -1.734185 | 0.382590  |
| 9             | 6             | 0           | 2.804551                | -1.506745 | 1.353259  |
| 10            | 6             | 0           | 1.954994                | -0.379285 | 1.281757  |
| 11            | 1             | 0           | 3.203940                | 0.964967  | -1.638176 |
| 12            | 1             | 0           | 4.659449                | -1.023565 | -1.458397 |
| 13            | 1             | 0           | 4.412056                | -2.602263 | 0.450444  |
| 14            | 1             | 0           | 2.696667                | -2.188400 | 2.192118  |
| 15            | 1             | 0           | 1.355085                | -0.103503 | 2.143742  |
| 16            | 46            | 0           | 0.106014                | -0.277693 | -0.169009 |
| 17            | 15            | 0           | -1.690989               | -1.902484 | -0.237198 |

|    |    |   |           |           |           |
|----|----|---|-----------|-----------|-----------|
| 18 | 15 | 0 | -3.942173 | 0.529236  | 1.132572  |
| 19 | 6  | 0 | -3.437872 | 0.327357  | -0.715750 |
| 20 | 1  | 0 | -4.208736 | 0.760183  | -1.361466 |
| 21 | 1  | 0 | -2.515760 | 0.907377  | -0.846770 |
| 22 | 6  | 0 | -3.213954 | -1.136344 | -1.109152 |
| 23 | 1  | 0 | -2.987488 | -1.191925 | -2.179889 |
| 24 | 1  | 0 | -4.096897 | -1.758417 | -0.926205 |
| 25 | 1  | 0 | -1.615354 | -3.161587 | -0.927051 |
| 26 | 1  | 0 | -2.258521 | -2.389531 | 0.985795  |
| 27 | 1  | 0 | -5.363840 | 0.291170  | 0.966652  |
| 28 | 1  | 0 | -4.066330 | 1.968922  | 1.118648  |

**TS2-2P** (outer attack of carbene to phenyl)

SCF Done: E(RB+HF-LYP) = -789.878455351 A.U.

| Center Number | Atomic Number | Atomic Type | Coordinates (Angstroms) |           |           |
|---------------|---------------|-------------|-------------------------|-----------|-----------|
|               |               |             | X                       | Y         | Z         |
| 1             | 6             | 0           | -1.687572               | -0.601862 | 1.668066  |
| 2             | 6             | 0           | -1.542608               | -0.034154 | -0.053948 |
| 3             | 9             | 0           | -1.085240               | 0.326698  | 2.461830  |
| 4             | 9             | 0           | -2.985308               | -0.553597 | 2.022243  |
| 5             | 9             | 0           | 0.018546                | -2.393356 | -0.254909 |
| 6             | 6             | 0           | -2.213106               | -0.917040 | -0.957960 |
| 7             | 6             | 0           | -3.273875               | -0.482788 | -1.732782 |
| 8             | 6             | 0           | -3.734339               | 0.842007  | -1.637259 |
| 9             | 6             | 0           | -3.099850               | 1.733051  | -0.771054 |
| 10            | 6             | 0           | -2.007831               | 1.313441  | -0.013881 |
| 11            | 1             | 0           | -1.841838               | -1.936180 | -1.004162 |
| 12            | 1             | 0           | -3.759196               | -1.175208 | -2.416537 |
| 13            | 1             | 0           | -4.584730               | 1.168514  | -2.230234 |
| 14            | 1             | 0           | -3.455623               | 2.757109  | -0.683569 |
| 15            | 1             | 0           | -1.561497               | 2.003443  | 0.697141  |
| 16            | 46            | 0           | 0.520562                | -0.469035 | -0.105080 |
| 17            | 15            | 0           | 1.375058                | 1.784916  | -0.015828 |
| 18            | 15            | 0           | 2.942396                | -1.083818 | -0.234564 |
| 19            | 6             | 0           | 3.895584                | 0.549247  | -0.540235 |
| 20            | 1             | 0           | 4.953657                | 0.439533  | -0.285335 |
| 21            | 1             | 0           | 3.832650                | 0.746182  | -1.616005 |
| 22            | 6             | 0           | 3.268778                | 1.700760  | 0.255384  |
| 23            | 1             | 0           | 3.731227                | 2.655604  | -0.012099 |
| 24            | 1             | 0           | 3.412315                | 1.551021  | 1.331045  |
| 25            | 1             | 0           | 1.276768                | 2.633374  | -1.168769 |
| 26            | 1             | 0           | 0.989403                | 2.735249  | 0.984987  |
| 27            | 1             | 0           | 3.652428                | -1.625586 | 0.890296  |
| 28            | 1             | 0           | 3.483722                | -1.927606 | -1.257692 |

**TS2-2P-iso** (F lies at the apical position)

SCF Done: E(RB+HF-LYP) = -789.924594350 A.U.

| Center Number | Atomic Number | Atomic Type | Coordinates (Angstroms) |           |           |
|---------------|---------------|-------------|-------------------------|-----------|-----------|
|               |               |             | X                       | Y         | Z         |
| 1             | 6             | 0           | 0.910555                | 1.879489  | 0.029126  |
| 2             | 6             | 0           | 1.731930                | -0.216685 | -0.061285 |
| 3             | 9             | 0           | 1.370339                | 2.399365  | 1.140077  |
| 4             | 9             | 0           | 1.427323                | 2.570503  | -0.958907 |
| 5             | 9             | 0           | -1.881323               | -0.509521 | 1.690060  |
| 6             | 6             | 0           | 2.474641                | -0.394888 | -1.234966 |
| 7             | 6             | 0           | 3.705516                | -1.056398 | -1.190744 |
| 8             | 6             | 0           | 4.208094                | -1.519402 | 0.027278  |
| 9             | 6             | 0           | 3.481506                | -1.316949 | 1.204081  |
| 10            | 6             | 0           | 2.251336                | -0.656221 | 1.164240  |
| 11            | 1             | 0           | 2.095432                | -0.025261 | -2.183767 |
| 12            | 1             | 0           | 4.273044                | -1.202760 | -2.106435 |
| 13            | 1             | 0           | 5.168364                | -2.027308 | 0.061644  |
| 14            | 1             | 0           | 3.873719                | -1.669543 | 2.154734  |
| 15            | 1             | 0           | 1.689958                | -0.498091 | 2.081019  |
| 16            | 46            | 0           | -0.284638               | 0.391617  | -0.111378 |
| 17            | 15            | 0           | -1.302502               | -1.857032 | -0.273954 |
| 18            | 15            | 0           | -2.648995               | 1.019690  | -0.032710 |
| 19            | 6             | 0           | -3.735626               | -0.435386 | -0.612936 |
| 20            | 1             | 0           | -4.759937               | -0.281356 | -0.257700 |
| 21            | 1             | 0           | -3.750498               | -0.363116 | -1.706177 |
| 22            | 6             | 0           | -3.202483               | -1.789207 | -0.152918 |
| 23            | 1             | 0           | -3.645858               | -2.595635 | -0.746513 |
| 24            | 1             | 0           | -3.399524               | -1.930297 | 0.907298  |
| 25            | 1             | 0           | -1.099269               | -2.737681 | -1.406723 |
| 26            | 1             | 0           | -0.914623               | -2.755992 | 0.757120  |
| 27            | 1             | 0           | -3.168821               | 1.485816  | 1.202950  |
| 28            | 1             | 0           | -3.196037               | 2.037750  | -0.906415 |

**Pd-CF3 and Pd-Ph BDE calculations:****L<sub>2</sub>Pd(Ph)•**

SCF Done: E(UB+HF-LYP) = -452.355853493 A.U.

| Center Number | Atomic Number | Atomic Type | Coordinates (Angstroms) |           |           |
|---------------|---------------|-------------|-------------------------|-----------|-----------|
|               |               |             | X                       | Y         | Z         |
| 1             | 6             | 0           | 3.772499                | 1.143734  | -0.687546 |
| 2             | 6             | 0           | 2.389566                | 0.936246  | -0.726848 |
| 3             | 6             | 0           | 1.787123                | -0.125359 | -0.029174 |
| 4             | 6             | 0           | 2.625900                | -0.959691 | 0.732777  |
| 5             | 6             | 0           | 4.009665                | -0.753955 | 0.780091  |
| 6             | 6             | 0           | 4.588106                | 0.298767  | 0.068181  |
| 7             | 46            | 0           | -0.214809               | -0.553396 | -0.150277 |
| 8             | 15            | 0           | -1.285390               | 1.716138  | 0.392498  |
| 9             | 6             | 0           | -3.167713               | 1.503495  | 0.055752  |
| 10            | 6             | 0           | -3.670292               | 0.114048  | 0.457282  |
| 11            | 15            | 0           | -2.603083               | -1.285819 | -0.315091 |
| 12            | 1             | 0           | 2.203635                | -1.789249 | 1.297986  |
| 13            | 1             | 0           | 4.635025                | -1.417328 | 1.374963  |
| 14            | 1             | 0           | 5.662838                | 0.461233  | 0.104993  |
| 15            | 1             | 0           | 4.212842                | 1.968424  | -1.245423 |
| 16            | 1             | 0           | 1.776612                | 1.614083  | -1.318873 |
| 17            | 1             | 0           | -4.717955               | -0.012169 | 0.168094  |
| 18            | 1             | 0           | -3.606935               | -0.020051 | 1.542789  |
| 19            | 1             | 0           | -3.734302               | 2.277073  | 0.582760  |
| 20            | 1             | 0           | -3.305728               | 1.666724  | -1.018899 |
| 21            | 1             | 0           | -1.336831               | 2.103834  | 1.779194  |
| 22            | 1             | 0           | -1.117863               | 3.045822  | -0.145109 |
| 23            | 1             | 0           | -3.255986               | -1.418705 | -1.590944 |
| 24            | 1             | 0           | -3.216181               | -2.421965 | 0.317001  |

**CF<sub>3</sub>•**

SCF Done: E(UB+HF-LYP) = -337.547406910 A.U.

| Center Number | Atomic Number | Atomic Type | Coordinates (Angstroms) |           |           |
|---------------|---------------|-------------|-------------------------|-----------|-----------|
|               |               |             | X                       | Y         | Z         |
| 1             | 6             | 0           | 0.000006                | 0.000231  | 0.329042  |
| 2             | 9             | 0           | 1.108886                | -0.607772 | -0.073106 |
| 3             | 9             | 0           | -1.080886               | -0.656261 | -0.073103 |
| 4             | 9             | 0           | -0.028004               | 1.263879  | -0.073153 |

**L<sub>2</sub>Pd(CF<sub>3</sub>)•**

SCF Done: E(UB+HF-LYP) = -558.349568309 A.U.

| Center Number | Atomic Number | Atomic Type | Coordinates (Angstroms) |           |           |
|---------------|---------------|-------------|-------------------------|-----------|-----------|
|               |               |             | X                       | Y         | Z         |
| 1             | 6             | 0           | -2.224672               | 0.091608  | -0.015767 |
| 2             | 9             | 0           | -2.763830               | 0.227991  | 1.235049  |
| 3             | 46            | 0           | -0.287117               | -0.548428 | 0.020914  |
| 4             | 15            | 0           | 0.884348                | 1.736811  | -0.030878 |
| 5             | 6             | 0           | 2.737572                | 1.362027  | 0.306157  |
| 6             | 6             | 0           | 3.195576                | 0.070637  | -0.379962 |
| 7             | 15            | 0           | 2.068612                | -1.423017 | 0.057526  |
| 8             | 9             | 0           | -2.408504               | 1.308054  | -0.625544 |
| 9             | 9             | 0           | -3.045817               | -0.778814 | -0.681301 |
| 10            | 1             | 0           | 3.359434                | 2.200936  | -0.020529 |
| 11            | 1             | 0           | 2.841961                | 1.278151  | 1.393536  |
| 12            | 1             | 0           | 4.231757                | -0.156943 | -0.112518 |
| 13            | 1             | 0           | 3.150007                | 0.175275  | -1.469571 |
| 14            | 1             | 0           | 2.680823                | -1.852503 | 1.285283  |
| 15            | 1             | 0           | 2.648678                | -2.420258 | -0.797251 |
| 16            | 1             | 0           | 0.997807                | 2.449615  | -1.276352 |
| 17            | 1             | 0           | 0.715018                | 2.885788  | 0.819258  |

**Ph•**

SCF Done: E(UB+HF-LYP) = -231.561280746 A.U.

| Center Number | Atomic Number | Atomic Type | Coordinates (Angstroms) |           |           |
|---------------|---------------|-------------|-------------------------|-----------|-----------|
|               |               |             | X                       | Y         | Z         |
| 1             | 6             | 0           | -1.226409               | -0.771813 | -0.000108 |
| 2             | 6             | 0           | -0.000031               | -1.400130 | -0.000105 |
| 3             | 6             | 0           | 1.226444                | -0.771757 | 0.000147  |
| 4             | 6             | 0           | 1.214254                | 0.632561  | -0.000049 |
| 5             | 6             | 0           | -0.000030               | 1.324677  | -0.000060 |
| 6             | 6             | 0           | -1.214220               | 0.632648  | 0.000137  |
| 7             | 1             | 0           | 2.162932                | -1.323344 | 0.000183  |
| 8             | 1             | 0           | 2.154657                | 1.179161  | -0.000133 |
| 9             | 1             | 0           | 0.000101                | 2.411240  | -0.000111 |
| 10            | 1             | 0           | -2.154737               | 1.179043  | 0.000200  |



11 1 0 -2.163004 -1.323213 0.000092

**Ligand Effects**

**PH<sub>3</sub>-CP**

SCF Done: E(RB+HF-LYP) = -704.278604273 A.U.

| Center Number | Atomic Number | Atomic Type | Coordinates (Angstroms) |           |           |
|---------------|---------------|-------------|-------------------------|-----------|-----------|
|               |               |             | X                       | Y         | Z         |
| 1             | 6             | 0           | 3.485858                | -1.078165 | 0.858043  |
| 2             | 6             | 0           | 2.088194                | -1.017105 | 0.896258  |
| 3             | 6             | 0           | 1.386421                | -0.223245 | -0.025813 |
| 4             | 6             | 0           | 2.104972                | 0.548850  | -0.948837 |
| 5             | 6             | 0           | 3.500992                | 0.484906  | -0.983077 |
| 6             | 6             | 0           | 4.193486                | -0.328667 | -0.082883 |
| 7             | 46            | 0           | -0.586536               | -0.537399 | -0.098032 |
| 8             | 6             | 0           | -0.902949               | 1.408231  | 0.271071  |
| 9             | 9             | 0           | -0.487763               | 2.228242  | -0.722625 |
| 10            | 15            | 0           | -3.028411               | -1.304878 | -0.259295 |
| 11            | 9             | 0           | -2.258812               | 1.603152  | 0.372604  |
| 12            | 9             | 0           | -0.374738               | 1.872067  | 1.419670  |
| 13            | 1             | 0           | 1.580639                | 1.200026  | -1.640637 |
| 14            | 1             | 0           | 4.048764                | 1.077001  | -1.712712 |
| 15            | 1             | 0           | 5.279452                | -0.369978 | -0.108039 |
| 16            | 1             | 0           | 4.017795                | -1.701655 | 1.573067  |
| 17            | 1             | 0           | 1.555087                | -1.592409 | 1.650844  |
| 18            | 1             | 0           | -3.852117               | -0.658851 | -1.234877 |
| 19            | 1             | 0           | -3.404670               | -2.658582 | -0.545878 |
| 20            | 1             | 0           | -3.868171               | -1.102007 | 0.881721  |

**PH<sub>3</sub>-TS**

SCF Done: E(RB+HF-LYP) = -704.249524701 A.U.

| Center Number | Atomic Number | Atomic Type | Coordinates (Angstroms) |           |           |
|---------------|---------------|-------------|-------------------------|-----------|-----------|
|               |               |             | X                       | Y         | Z         |
| 1             | 6             | 0           | 1.769836                | -0.286411 | 1.204175  |
| 2             | 6             | 0           | 1.118481                | -0.089337 | -0.021837 |
| 3             | 6             | 0           | 1.771206                | -0.392460 | -1.228654 |
| 4             | 6             | 0           | 3.037456                | -0.977605 | -1.196619 |
| 5             | 6             | 0           | 3.672143                | -1.216433 | 0.026756  |
| 6             | 6             | 0           | 3.040673                | -0.868628 | 1.222595  |
| 7             | 46            | 0           | -0.861394               | -0.459620 | -0.021975 |
| 8             | 15            | 0           | -3.225781               | -1.082695 | 0.032776  |
| 9             | 6             | 0           | 0.012142                | 1.630526  | -0.021187 |
| 10            | 9             | 0           | -1.111695               | 2.150296  | -0.615540 |
| 11            | 9             | 0           | -0.024693               | 2.021002  | 1.274843  |
| 12            | 9             | 0           | 1.015807                | 2.323432  | -0.612975 |
| 13            | 1             | 0           | 1.293176                | -0.172863 | -2.178580 |
| 14            | 1             | 0           | 3.535449                | -1.234938 | -2.128033 |
| 15            | 1             | 0           | 4.665274                | -1.657217 | 0.045352  |
| 16            | 1             | 0           | 3.540147                | -1.039189 | 2.172959  |
| 17            | 1             | 0           | 1.289872                | 0.014680  | 2.129515  |
| 18            | 1             | 0           | -3.980493               | -1.136638 | -1.186341 |
| 19            | 1             | 0           | -3.631024               | -2.359188 | 0.550947  |
| 20            | 1             | 0           | -4.147933               | -0.282172 | 0.785056  |

**PP-CP**

SCF Done: E(RB+HF-LYP) = -788.764188801 A.U.

| Center Number | Atomic Number | Atomic Type | Coordinates (Angstroms) |           |           |
|---------------|---------------|-------------|-------------------------|-----------|-----------|
|               |               |             | X                       | Y         | Z         |
| 1             | 6             | 0           | -1.611957               | -0.387032 | -0.003746 |
| 2             | 6             | 0           | -2.404586               | -0.198426 | 1.136190  |
| 3             | 6             | 0           | -3.730916               | -0.643487 | 1.164435  |
| 4             | 6             | 0           | -4.290155               | -1.268107 | 0.048318  |
| 5             | 6             | 0           | -3.513622               | -1.445327 | -1.098118 |
| 6             | 6             | 0           | -2.184481               | -1.008567 | -1.123433 |
| 7             | 46            | 0           | 0.359985                | 0.119374  | -0.022695 |
| 8             | 15            | 0           | 2.845708                | 0.570115  | -0.013826 |
| 9             | 6             | 0           | 3.739993                | -1.077468 | 0.095385  |
| 10            | 6             | 0           | 3.065153                | -2.228379 | 0.146119  |
| 11            | 15            | 0           | 1.186248                | -2.254854 | 0.107580  |
| 12            | 6             | 0           | -0.255184               | 2.061613  | -0.090068 |
| 13            | 9             | 0           | -1.060650               | 2.388121  | -1.130073 |
| 14            | 9             | 0           | 0.837983                | 2.902970  | -0.208207 |
| 15            | 9             | 0           | -0.893891               | 2.478088  | 1.037996  |
| 16            | 1             | 0           | -5.322906               | -1.607339 | 0.069021  |
| 17            | 1             | 0           | -1.600588               | -1.152514 | -2.030037 |
| 18            | 1             | 0           | -3.940901               | -1.921115 | -1.978517 |
| 19            | 1             | 0           | -4.330137               | -0.490030 | 2.059529  |
| 20            | 1             | 0           | -1.998338               | 0.312851  | 2.003772  |

|    |   |   |          |           |           |
|----|---|---|----------|-----------|-----------|
| 21 | 1 | 0 | 0.906404 | -3.098444 | 1.233877  |
| 22 | 1 | 0 | 0.953180 | -3.230943 | -0.919043 |
| 23 | 1 | 0 | 3.597987 | -3.175329 | 0.210696  |
| 24 | 1 | 0 | 4.828297 | -1.082584 | 0.118053  |
| 25 | 1 | 0 | 3.495929 | 1.297150  | 1.038208  |
| 26 | 1 | 0 | 3.535996 | 1.176648  | -1.115864 |

**PP-TS**

SCF Done: E(RB+HF-LYP) = -788.714463327 A.U.

| Center<br>Number | Atomic<br>Number | Atomic<br>Type | Coordinates (Angstroms) |           |           |
|------------------|------------------|----------------|-------------------------|-----------|-----------|
|                  |                  |                | X                       | Y         | Z         |
| 1                | 6                | 0              | -2.723267               | -0.428408 | -0.875072 |
| 2                | 6                | 0              | -3.854539               | 0.307981  | -1.239117 |
| 3                | 6                | 0              | -4.021536               | 1.614791  | -0.776738 |
| 4                | 6                | 0              | -3.059018               | 2.191399  | 0.058514  |
| 5                | 6                | 0              | -1.927777               | 1.465861  | 0.433214  |
| 6                | 6                | 0              | -1.740376               | 0.168598  | -0.072999 |
| 7                | 46               | 0              | 0.166573                | -0.253164 | -0.578089 |
| 8                | 6                | 0              | -0.898980               | -1.175098 | 1.202915  |
| 9                | 9                | 0              | 0.300007                | -1.442331 | 1.831205  |
| 10               | 15               | 0              | 2.410447                | -0.733712 | -1.417314 |
| 11               | 6                | 0              | 3.914305                | 0.236251  | -0.879384 |
| 12               | 6                | 0              | 3.962960                | 1.072393  | 0.161097  |
| 13               | 15               | 0              | 2.582865                | 1.617112  | 1.317174  |
| 14               | 9                | 0              | -1.372809               | -2.371183 | 0.784412  |
| 15               | 9                | 0              | -1.687130               | -0.771590 | 2.229638  |
| 16               | 1                | 0              | -4.908281               | 2.179232  | -1.052584 |
| 17               | 1                | 0              | -1.194058               | 1.902206  | 1.103983  |
| 18               | 1                | 0              | -3.195006               | 3.204483  | 0.428456  |
| 19               | 1                | 0              | -4.609791               | -0.146521 | -1.875333 |
| 20               | 1                | 0              | -2.606264               | -1.455015 | -1.205907 |
| 21               | 1                | 0              | 2.902241                | -2.076766 | -1.263529 |
| 22               | 1                | 0              | 2.595452                | -0.657605 | -2.840873 |
| 23               | 1                | 0              | 4.808234                | 0.090402  | -1.483303 |
| 24               | 1                | 0              | 4.903919                | 1.593044  | 0.335308  |
| 25               | 1                | 0              | 2.203399                | 0.338564  | 1.857528  |
| 26               | 1                | 0              | 3.466844                | 1.965865  | 2.408563  |

**PN-CP**

SCF Done: E(RB+HF-LYP) = -837.045346248 A.U.

| Center<br>Number | Atomic<br>Number | Atomic<br>Type | Coordinates (Angstroms) |           |           |
|------------------|------------------|----------------|-------------------------|-----------|-----------|
|                  |                  |                | X                       | Y         | Z         |
| 1                | 6                | 0              | 2.295092                | -0.091611 | -1.113127 |
| 2                | 6                | 0              | 3.636163                | -0.489805 | -1.143204 |
| 3                | 6                | 0              | 4.199953                | -1.155686 | -0.053652 |
| 4                | 6                | 0              | 3.412397                | -1.421893 | 1.068083  |
| 5                | 6                | 0              | 2.068884                | -1.032993 | 1.094352  |
| 6                | 6                | 0              | 1.490716                | -0.371201 | 0.000250  |
| 7                | 46               | 0              | -0.480132               | 0.053775  | 0.020603  |
| 8                | 6                | 0              | 0.014297                | 2.020375  | 0.105287  |
| 9                | 9                | 0              | -1.161157               | 2.767795  | 0.191787  |
| 10               | 15               | 0              | -1.442413               | -2.256353 | -0.136355 |
| 11               | 6                | 0              | -3.267494               | -1.850873 | -0.170896 |
| 12               | 6                | 0              | -3.658210               | -0.579045 | -0.085808 |
| 13               | 7                | 0              | -2.720739               | 0.512892  | 0.041503  |
| 14               | 9                | 0              | 0.645975                | 2.508109  | -0.996577 |
| 15               | 9                | 0              | 0.750657                | 2.413306  | 1.172221  |
| 16               | 1                | 0              | 5.244149                | -1.457952 | -0.075067 |
| 17               | 1                | 0              | 1.475425                | -1.248771 | 1.980315  |
| 18               | 1                | 0              | 3.842516                | -1.930948 | 1.928332  |
| 19               | 1                | 0              | 4.243003                | -0.267409 | -2.018556 |
| 20               | 1                | 0              | 1.884372                | 0.453515  | -1.957698 |
| 21               | 1                | 0              | -1.333529               | -3.118375 | -1.279305 |
| 22               | 1                | 0              | -1.410737               | -3.282450 | 0.869225  |
| 23               | 1                | 0              | -4.008502               | -2.640127 | -0.261345 |
| 24               | 1                | 0              | -4.718781               | -0.324318 | -0.109023 |
| 25               | 1                | 0              | -2.853043               | 1.205569  | -0.696628 |
| 26               | 1                | 0              | -2.867456               | 1.026150  | 0.912200  |

**PN-TS**

SCF Done: E(RB+HF-LYP) = -836.995453472 A.U.

| Center<br>Number | Atomic<br>Number | Atomic<br>Type | Coordinates (Angstroms) |           |           |
|------------------|------------------|----------------|-------------------------|-----------|-----------|
|                  |                  |                | X                       | Y         | Z         |
| 1                | 6                | 0              | -3.125940               | -1.470205 | 1.153746  |
| 2                | 6                | 0              | -3.594318               | -1.996765 | -0.052067 |
| 3                | 6                | 0              | -3.012390               | -1.586751 | -1.256903 |
| 4                | 6                | 0              | -1.965444               | -0.667389 | -1.259011 |
| 5                | 6                | 0              | -1.450533               | -0.176701 | -0.041384 |

|    |    |   |           |           |           |
|----|----|---|-----------|-----------|-----------|
| 6  | 6  | 0 | -2.075549 | -0.550497 | 1.163270  |
| 7  | 46 | 0 | 0.571276  | 0.086870  | 0.037447  |
| 8  | 15 | 0 | 2.117322  | -1.909316 | 0.154788  |
| 9  | 6  | 0 | 3.750736  | -1.098439 | -0.259417 |
| 10 | 6  | 0 | 3.846317  | 0.234794  | -0.261123 |
| 11 | 7  | 0 | 2.773357  | 1.079528  | 0.170827  |
| 12 | 6  | 0 | -1.033002 | 1.713815  | -0.037158 |
| 13 | 9  | 0 | -0.910770 | 2.185864  | 1.236018  |
| 14 | 9  | 0 | -2.270417 | 2.097724  | -0.447329 |
| 15 | 9  | 0 | -0.205241 | 2.491716  | -0.830212 |
| 16 | 1  | 0 | -4.420219 | -2.703028 | -0.056781 |
| 17 | 1  | 0 | -1.538078 | -0.333139 | -2.200355 |
| 18 | 1  | 0 | -3.383722 | -1.978903 | -2.200943 |
| 19 | 1  | 0 | -3.585391 | -1.768566 | 2.093308  |
| 20 | 1  | 0 | -1.735319 | -0.120902 | 2.100554  |
| 21 | 1  | 0 | 2.441656  | -2.543159 | 1.410409  |
| 22 | 1  | 0 | 2.258937  | -3.102585 | -0.645654 |
| 23 | 1  | 0 | 4.601958  | -1.699770 | -0.564012 |
| 24 | 1  | 0 | 4.757262  | 0.724654  | -0.607478 |
| 25 | 1  | 0 | 2.789376  | 1.229781  | 1.178302  |
| 26 | 1  | 0 | 2.800109  | 1.993743  | -0.273538 |

**PO-CP**

SCF Done: E(RB+HF-LYP) = -896.207654855 A.U.

| Center<br>Number | Atomic<br>Number | Atomic<br>Type | Coordinates (Angstroms) |           |           |
|------------------|------------------|----------------|-------------------------|-----------|-----------|
|                  |                  |                | X                       | Y         | Z         |
| 1                | 6                | 0              | 2.117235                | 0.799722  | 1.155749  |
| 2                | 6                | 0              | 3.445026                | 1.244031  | 1.138624  |
| 3                | 6                | 0              | 4.233226                | 1.055491  | 0.001747  |
| 4                | 6                | 0              | 3.688756                | 0.413718  | -1.112729 |
| 5                | 6                | 0              | 2.363597                | -0.034285 | -1.093721 |
| 6                | 6                | 0              | 1.553058                | 0.170458  | 0.032950  |
| 7                | 46               | 0              | -0.431170               | -0.215598 | 0.031735  |
| 8                | 6                | 0              | 0.023982                | -2.160300 | 0.055814  |
| 9                | 9                | 0              | -1.137117               | -2.893680 | 0.126103  |
| 10               | 15               | 0              | -2.957450               | -0.286878 | 0.011061  |
| 11               | 6                | 0              | -3.413089               | 1.507699  | -0.068945 |
| 12               | 6                | 0              | -2.446412               | 2.431789  | -0.092750 |
| 13               | 8                | 0              | -1.119009               | 2.127450  | -0.025056 |
| 14               | 6                | 0              | -0.206837               | 3.206987  | -0.304973 |
| 15               | 9                | 0              | 0.772485                | -2.567468 | 1.106468  |
| 16               | 9                | 0              | 0.654834                | -2.592932 | -1.066659 |
| 17               | 1                | 0              | 5.265668                | 1.396030  | -0.011548 |
| 18               | 1                | 0              | -0.270343               | 3.488374  | -1.361111 |
| 19               | 1                | 0              | 0.787320                | 2.827726  | -0.075962 |
| 20               | 1                | 0              | -0.441139               | 4.066036  | 0.333111  |
| 21               | 1                | 0              | 1.967058                | -0.556522 | -1.959309 |
| 22               | 1                | 0              | 4.299301                | 0.251640  | -1.998574 |
| 23               | 1                | 0              | 3.863981                | 1.727034  | 2.019068  |
| 24               | 1                | 0              | 1.524432                | 0.946481  | 2.056574  |
| 25               | 1                | 0              | -4.447055               | 1.833370  | -0.092812 |
| 26               | 1                | 0              | -2.663929               | 3.497675  | -0.148049 |
| 27               | 1                | 0              | -3.740035               | -0.845458 | -1.054198 |
| 28               | 1                | 0              | -3.760690               | -0.756456 | 1.103743  |

**PO-TS**

SCF Done: E(RB+HF-LYP) = -896.167810312 A.U.

| Center<br>Number | Atomic<br>Number | Atomic<br>Type | Coordinates (Angstroms) |           |           |
|------------------|------------------|----------------|-------------------------|-----------|-----------|
|                  |                  |                | X                       | Y         | Z         |
| 1                | 6                | 0              | -1.790750               | 0.985468  | -1.216139 |
| 2                | 6                | 0              | -2.437754               | 2.221138  | -1.169231 |
| 3                | 6                | 0              | -2.804148               | 2.779731  | 0.060619  |
| 4                | 6                | 0              | -2.525691               | 2.096518  | 1.246607  |
| 5                | 6                | 0              | -1.872440               | 0.861084  | 1.211657  |
| 6                | 6                | 0              | -1.464393               | 0.322515  | -0.019012 |
| 7                | 46               | 0              | 0.348552                | -0.550615 | -0.015290 |
| 8                | 6                | 0              | -1.628966               | -1.679897 | -0.038959 |
| 9                | 9                | 0              | -1.069000               | -2.736632 | -0.713385 |
| 10               | 15               | 0              | 2.674681                | -1.351266 | 0.044871  |
| 11               | 6                | 0              | 3.897953                | 0.045415  | 0.089069  |
| 12               | 6                | 0              | 3.503282                | 1.322802  | 0.004350  |
| 13               | 8                | 0              | 2.213149                | 1.688431  | -0.161967 |
| 14               | 6                | 0              | 1.909297                | 3.074322  | -0.002573 |
| 15               | 9                | 0              | -2.880987               | -1.619576 | -0.566396 |
| 16               | 9                | 0              | -1.777698               | -2.072610 | 1.250543  |
| 17               | 1                | 0              | -3.324350               | 3.733565  | 0.090902  |
| 18               | 1                | 0              | 2.070878                | 3.393417  | 1.034018  |
| 19               | 1                | 0              | 0.855024                | 3.183529  | -0.257823 |
| 20               | 1                | 0              | 2.519425                | 3.687343  | -0.678061 |
| 21               | 1                | 0              | -1.682197               | 0.314448  | 2.129658  |
| 22               | 1                | 0              | -2.826341               | 2.519022  | 2.202357  |

|    |   |   |           |           |           |
|----|---|---|-----------|-----------|-----------|
| 23 | 1 | 0 | -2.670748 | 2.742398  | -2.094697 |
| 24 | 1 | 0 | -1.536923 | 0.537134  | -2.172209 |
| 25 | 1 | 0 | 4.957590  | -0.164481 | 0.185073  |
| 26 | 1 | 0 | 4.222348  | 2.142882  | 0.045798  |
| 27 | 1 | 0 | 3.169440  | -2.161398 | 1.125321  |
| 28 | 1 | 0 | 3.217874  | -2.153259 | -1.019494 |

**TS<sub>a</sub>-PO**

SCF Done: E(RB+HF-LYP) = -896.157364844 A.U.

| Center<br>Number | Atomic<br>Number | Atomic<br>Type | Coordinates (Angstroms) |           |           |
|------------------|------------------|----------------|-------------------------|-----------|-----------|
|                  |                  |                | X                       | Y         | Z         |
| 1                | 6                | 0              | 3.462711                | -1.213514 | 1.606189  |
| 2                | 6                | 0              | 2.186244                | -0.690720 | 1.370386  |
| 3                | 6                | 0              | 1.805768                | -0.288104 | 0.082601  |
| 4                | 6                | 0              | 2.730519                | -0.413981 | -0.963181 |
| 5                | 6                | 0              | 4.006638                | -0.937645 | -0.727081 |
| 6                | 6                | 0              | 4.376196                | -1.339407 | 0.557955  |
| 7                | 46               | 0              | -0.071428               | 0.438886  | -0.256799 |
| 8                | 6                | 0              | 0.328678                | 2.315031  | -0.035517 |
| 9                | 9                | 0              | 0.508095                | 3.168444  | -0.996803 |
| 10               | 15               | 0              | -0.790381               | -1.885220 | -0.580393 |
| 11               | 6                | 0              | -2.576087               | -2.085847 | -0.967894 |
| 12               | 6                | 0              | -3.485953               | -1.529478 | -0.159530 |
| 13               | 8                | 0              | -3.156582               | -1.077129 | 1.064873  |
| 14               | 9                | 0              | -1.956664               | 1.173962  | -0.579678 |
| 15               | 9                | 0              | 0.156699                | 2.997187  | 1.056803  |
| 16               | 1                | 0              | 2.462847                | -0.104718 | -1.971180 |
| 17               | 1                | 0              | 4.711211                | -1.029215 | -1.550824 |
| 18               | 1                | 0              | 5.367677                | -1.745505 | 0.741193  |
| 19               | 1                | 0              | 3.740273                | -1.521670 | 2.611862  |
| 20               | 1                | 0              | 1.488822                | -0.601008 | 2.200501  |
| 21               | 1                | 0              | -4.543894               | -1.467321 | -0.426836 |
| 22               | 1                | 0              | -2.863635               | -2.520963 | -1.917160 |
| 23               | 1                | 0              | -0.166572               | -2.590703 | -1.654298 |
| 24               | 1                | 0              | -0.492848               | -2.791680 | 0.487523  |
| 25               | 6                | 0              | -3.804851               | 0.141074  | 1.471974  |
| 26               | 1                | 0              | -3.632712               | 0.233882  | 2.545945  |
| 27               | 1                | 0              | -3.344580               | 0.961858  | 0.916193  |
| 28               | 1                | 0              | -4.884886               | 0.082834  | 1.278407  |

**PObenzene-CP**

SCF Done: E(RB+HF-LYP) = -1128.51139297 A.U.

| Center<br>Number | Atomic<br>Number | Atomic<br>Type | Coordinates (Angstroms) |           |           |
|------------------|------------------|----------------|-------------------------|-----------|-----------|
|                  |                  |                | X                       | Y         | Z         |
| 1                | 6                | 0              | 5.084478                | 1.200451  | -0.200050 |
| 2                | 6                | 0              | 4.252553                | 0.083475  | -0.119852 |
| 3                | 6                | 0              | 2.863134                | 0.209562  | -0.029839 |
| 4                | 6                | 0              | 2.298702                | 1.502232  | -0.018032 |
| 5                | 6                | 0              | 3.127887                | 2.628460  | -0.099920 |
| 6                | 6                | 0              | 4.511670                | 2.470342  | -0.190194 |
| 7                | 15               | 0              | 1.730878                | -1.279781 | 0.069431  |
| 8                | 6                | 0              | 2.268221                | -2.366474 | -1.369285 |
| 9                | 8                | 0              | 0.926293                | 1.605448  | 0.078172  |
| 10               | 6                | 0              | 0.343504                | 2.917156  | 0.114910  |
| 11               | 6                | 0              | 2.361026                | -2.233623 | 1.564427  |
| 12               | 46               | 0              | -0.557636               | -0.340686 | 0.055349  |
| 13               | 6                | 0              | -1.601299               | -2.039301 | -0.000771 |
| 14               | 6                | 0              | -2.333113               | 0.646811  | 0.006311  |
| 15               | 1                | 0              | 2.106554                | -1.823155 | -2.303426 |
| 16               | 1                | 0              | 1.632734                | -3.255794 | -1.365083 |
| 17               | 1                | 0              | 6.161144                | 1.079114  | -0.270001 |
| 18               | 1                | 0              | 2.709662                | 3.626977  | -0.095491 |
| 19               | 1                | 0              | 5.139739                | 3.354638  | -0.253290 |
| 20               | 1                | 0              | 0.726294                | 3.479989  | 0.973141  |
| 21               | 1                | 0              | -0.728150               | 2.759295  | 0.219477  |
| 22               | 1                | 0              | 0.554945                | 3.456582  | -0.814636 |
| 23               | 1                | 0              | 3.319552                | -2.660212 | -1.292439 |
| 24               | 1                | 0              | 3.417245                | -2.500473 | 1.460113  |
| 25               | 1                | 0              | 1.758107                | -3.140331 | 1.662575  |
| 26               | 1                | 0              | 2.224835                | -1.622048 | 2.459595  |
| 27               | 1                | 0              | 4.695217                | -0.909692 | -0.128680 |
| 28               | 9                | 0              | -2.478804               | -2.218067 | 1.013111  |
| 29               | 9                | 0              | -2.291532               | -2.223282 | -1.155276 |
| 30               | 9                | 0              | -0.741175               | -3.122375 | 0.075539  |
| 31               | 6                | 0              | -3.055290               | 0.811851  | -1.186523 |
| 32               | 6                | 0              | -4.177944               | 1.644644  | -1.239403 |
| 33               | 6                | 0              | -4.613735               | 2.313706  | -0.093397 |
| 34               | 6                | 0              | -3.922278               | 2.140303  | 1.106997  |
| 35               | 6                | 0              | -2.796748               | 1.308894  | 1.156529  |
| 36               | 1                | 0              | -2.748900               | 0.279818  | -2.083295 |
| 37               | 1                | 0              | -4.718188               | 1.763691  | -2.176468 |

|    |   |   |           |          |           |
|----|---|---|-----------|----------|-----------|
| 38 | 1 | 0 | -5.490301 | 2.955892 | -0.133119 |
| 39 | 1 | 0 | -4.263011 | 2.643171 | 2.009951  |
| 40 | 1 | 0 | -2.280747 | 1.179827 | 2.106386  |

**PObenzene-TS**

SCF Done: E(RB+HF-LYP) = -1128.46928760 A.U.

| Center Number | Atomic Number | Atomic Type | Coordinates (Angstroms) |           |           |
|---------------|---------------|-------------|-------------------------|-----------|-----------|
|               |               |             | X                       | Y         | Z         |
| 1             | 6             | 0           | -5.366927               | 0.543959  | 0.119874  |
| 2             | 6             | 0           | -4.363820               | -0.426651 | 0.091012  |
| 3             | 6             | 0           | -3.010662               | -0.084776 | 0.019923  |
| 4             | 6             | 0           | -2.663000               | 1.283727  | -0.024892 |
| 5             | 6             | 0           | -3.665191               | 2.263962  | 0.006157  |
| 6             | 6             | 0           | -5.007340               | 1.889312  | 0.077766  |
| 7             | 15            | 0           | -1.662746               | -1.402194 | -0.017925 |
| 8             | 6             | 0           | -2.144467               | -2.509366 | 1.435114  |
| 9             | 8             | 0           | -1.334508               | 1.581961  | -0.100135 |
| 10            | 6             | 0           | -0.924541               | 2.943826  | -0.152455 |
| 11            | 6             | 0           | -2.193019               | -2.465604 | -1.487302 |
| 12            | 46            | 0           | 0.601157                | -0.454402 | -0.030910 |
| 13            | 6             | 0           | 2.617826                | -1.510237 | -0.012687 |
| 14            | 6             | 0           | 2.392928                | 0.470215  | -0.005368 |
| 15            | 1             | 0           | -2.009866               | -1.950544 | 2.364520  |
| 16            | 1             | 0           | -1.471539               | -3.371359 | 1.445782  |
| 17            | 1             | 0           | -6.411139               | 0.251152  | 0.175137  |
| 18            | 1             | 0           | -3.406281               | 3.315654  | -0.025732 |
| 19            | 1             | 0           | -5.771797               | 2.661417  | 0.100214  |
| 20            | 1             | 0           | -1.336807               | 3.447645  | -1.035715 |
| 21            | 1             | 0           | 0.163460                | 2.919466  | -0.218405 |
| 22            | 1             | 0           | -1.227926               | 3.484342  | 0.752804  |
| 23            | 1             | 0           | -3.179942               | -2.856839 | 1.364906  |
| 24            | 1             | 0           | -3.229859               | -2.804078 | -1.394332 |
| 25            | 1             | 0           | -1.528468               | -3.332367 | -1.543462 |
| 26            | 1             | 0           | -2.081977               | -1.880981 | -2.403885 |
| 27            | 1             | 0           | -4.646987               | -1.475858 | 0.126000  |
| 28            | 9             | 0           | 3.897328                | -1.412901 | -0.469247 |
| 29            | 9             | 0           | 2.712206                | -1.921848 | 1.277609  |
| 30            | 9             | 0           | 2.126331                | -2.571350 | -0.735119 |
| 31            | 6             | 0           | 2.758438                | 1.029616  | 1.230006  |
| 32            | 6             | 0           | 3.372125                | 2.284814  | 1.271003  |
| 33            | 6             | 0           | 3.654475                | 2.969956  | 0.086799  |
| 34            | 6             | 0           | 3.331004                | 2.393410  | -1.146842 |
| 35            | 6             | 0           | 2.722849                | 1.138433  | -1.199219 |
| 36            | 1             | 0           | 2.565473                | 0.482728  | 2.147456  |
| 37            | 1             | 0           | 3.638376                | 2.722350  | 2.230215  |
| 38            | 1             | 0           | 4.143843                | 3.939780  | 0.122059  |
| 39            | 1             | 0           | 3.566095                | 2.917029  | -2.070488 |
| 40            | 1             | 0           | 2.502506                | 0.677488  | -2.157770 |

**TS<sub>a,F</sub>-PObenzene**

SCF Done: E(RB+HF-LYP) = -1128.46205605 A.U.

| Center Number | Atomic Number | Atomic Type | Coordinates (Angstroms) |           |           |
|---------------|---------------|-------------|-------------------------|-----------|-----------|
|               |               |             | X                       | Y         | Z         |
| 1             | 6             | 0           | 4.009074                | -1.381990 | 1.567742  |
| 2             | 6             | 0           | 2.859877                | -0.609598 | 1.362302  |
| 3             | 6             | 0           | 2.362609                | -0.388227 | 0.069201  |
| 4             | 6             | 0           | 3.054358                | -0.950085 | -1.014442 |
| 5             | 6             | 0           | 4.203607                | -1.722955 | -0.810601 |
| 6             | 6             | 0           | 4.683493                | -1.943554 | 0.481806  |
| 7             | 46            | 0           | 0.677186                | 0.720736  | -0.236974 |
| 8             | 6             | 0           | 1.556457                | 2.423697  | -0.523267 |
| 9             | 9             | 0           | 2.056718                | 2.853884  | -1.643482 |
| 10            | 15            | 0           | -0.633561               | -1.332808 | 0.019286  |
| 11            | 6             | 0           | -2.456454               | -1.018978 | -0.181935 |
| 12            | 6             | 0           | -3.050983               | -0.078554 | 0.679239  |
| 13            | 8             | 0           | -2.290304               | 0.364342  | 1.722668  |
| 14            | 9             | 0           | -0.997710               | 1.848775  | -0.576750 |
| 15            | 9             | 0           | 1.478649                | 3.443631  | 0.276522  |
| 16            | 1             | 0           | 2.701725                | -0.786929 | -2.030714 |
| 17            | 1             | 0           | 4.724124                | -2.149189 | -1.665590 |
| 18            | 1             | 0           | 5.576515                | -2.542545 | 0.640648  |
| 19            | 1             | 0           | 4.377015                | -1.540716 | 2.579179  |
| 20            | 1             | 0           | 2.353097                | -0.177928 | 2.222750  |
| 21            | 6             | 0           | -3.217926               | -1.585587 | -1.208404 |
| 22            | 6             | 0           | -0.217853               | -2.643496 | -1.256781 |
| 23            | 6             | 0           | -0.443679               | -2.263618 | 1.641506  |
| 24            | 6             | 0           | -2.344851               | 1.763728  | 2.043442  |
| 25            | 1             | 0           | -1.646168               | 1.897742  | 2.872388  |
| 26            | 1             | 0           | -2.014081               | 2.326817  | 1.167225  |
| 27            | 1             | 0           | -3.345221               | 2.063528  | 2.376739  |
| 28            | 6             | 0           | -4.552528               | -1.219919 | -1.391633 |

|    |   |   |           |           |           |
|----|---|---|-----------|-----------|-----------|
| 29 | 1 | 0 | -2.769951 | -2.309343 | -1.882336 |
| 30 | 1 | 0 | -5.133053 | -1.666096 | -2.193695 |
| 31 | 6 | 0 | -5.127419 | -0.273108 | -0.543546 |
| 32 | 6 | 0 | -4.385178 | 0.296605  | 0.490435  |
| 33 | 1 | 0 | -6.164008 | 0.023104  | -0.680751 |
| 34 | 1 | 0 | -4.843959 | 1.022191  | 1.153290  |
| 35 | 1 | 0 | -1.011761 | -3.197994 | 1.608064  |
| 36 | 1 | 0 | 0.616755  | -2.473425 | 1.802327  |
| 37 | 1 | 0 | -0.821763 | -1.629650 | 2.444878  |
| 38 | 1 | 0 | -0.820897 | -3.545044 | -1.113006 |
| 39 | 1 | 0 | -0.379122 | -2.245952 | -2.261881 |
| 40 | 1 | 0 | 0.841522  | -2.887838 | -1.146346 |

Xantphos-CP

SCF Done: E(RB97D) = -2288.43045019 A.U.

| Center<br>Number | Atomic<br>Number | Atomic<br>Type | Coordinates (Angstroms) |           |           |
|------------------|------------------|----------------|-------------------------|-----------|-----------|
|                  |                  |                | X                       | Y         | Z         |
| 1                | 6                | 0              | -3.323101               | -3.283281 | -1.127002 |
| 2                | 6                | 0              | -3.016860               | -2.574624 | 0.050646  |
| 3                | 6                | 0              | -3.600058               | -2.967765 | 1.269059  |
| 4                | 6                | 0              | -4.480389               | -4.061169 | 1.308040  |
| 5                | 6                | 0              | -4.793305               | -4.759658 | 0.132090  |
| 6                | 6                | 0              | -4.213975               | -4.365933 | -1.084959 |
| 7                | 15               | 0              | -1.857834               | -1.073752 | -0.045795 |
| 8                | 6                | 0              | -1.692814               | -0.593154 | 1.777005  |
| 9                | 6                | 0              | -0.629778               | -1.156745 | 2.504129  |
| 10               | 6                | 0              | -0.462374               | -0.845683 | 3.860878  |
| 11               | 6                | 0              | -1.349222               | 0.038101  | 4.494093  |
| 12               | 6                | 0              | -2.413307               | 0.600030  | 3.770516  |
| 13               | 6                | 0              | -2.590422               | 0.279929  | 2.415568  |
| 14               | 6                | 0              | -3.045382               | 0.247026  | -0.703310 |
| 15               | 6                | 0              | -2.597612               | 1.575235  | -0.676963 |
| 16               | 6                | 0              | -3.329318               | 2.656083  | -1.194632 |
| 17               | 6                | 0              | -4.570510               | 2.361010  | -1.784896 |
| 18               | 6                | 0              | -5.052392               | 1.042477  | -1.822169 |
| 19               | 6                | 0              | -4.302160               | -0.010781 | -1.274706 |
| 20               | 6                | 0              | -2.755073               | 4.063664  | -0.982081 |
| 21               | 6                | 0              | -1.225832               | 3.973394  | -1.096702 |
| 22               | 6                | 0              | -0.600527               | 2.813554  | -0.599135 |
| 23               | 8                | 0              | -1.361260               | 1.782179  | -0.088053 |
| 24               | 6                | 0              | 0.789394                | 2.631337  | -0.578695 |
| 25               | 6                | 0              | 1.594601                | 3.687803  | -1.042613 |
| 26               | 6                | 0              | 1.005654                | 4.856565  | -1.545669 |
| 27               | 6                | 0              | -0.391707               | 4.992909  | -1.581452 |
| 28               | 6                | 0              | -3.354716               | 5.094085  | -1.957443 |
| 29               | 6                | 0              | -3.093994               | 4.494094  | 0.479144  |
| 30               | 15               | 0              | 1.516439                | 0.976736  | 0.024884  |
| 31               | 6                | 0              | 3.246791                | 1.143302  | -0.717118 |
| 32               | 6                | 0              | 4.411775                | 1.361978  | 0.031068  |
| 33               | 6                | 0              | 5.654977                | 1.446151  | -0.619858 |
| 34               | 6                | 0              | 5.732582                | 1.339170  | -2.015806 |
| 35               | 6                | 0              | 4.561060                | 1.142199  | -2.766658 |
| 36               | 6                | 0              | 3.324638                | 1.034261  | -2.118710 |
| 37               | 6                | 0              | 1.729896                | 1.272827  | 1.877011  |
| 38               | 6                | 0              | 2.595229                | 0.438237  | 2.611963  |
| 39               | 6                | 0              | 2.731555                | 0.614939  | 3.996922  |
| 40               | 6                | 0              | 1.990080                | 1.605224  | 4.660805  |
| 41               | 6                | 0              | 1.110282                | 2.419284  | 3.931266  |
| 42               | 6                | 0              | 0.983128                | 2.259845  | 2.543153  |
| 43               | 46               | 0              | 0.644174                | -1.326047 | -0.678410 |
| 44               | 6                | 0              | 2.552443                | -2.012398 | -0.425124 |
| 45               | 6                | 0              | 2.905192                | -2.486238 | 0.854051  |
| 46               | 6                | 0              | 4.228564                | -2.874188 | 1.140706  |
| 47               | 6                | 0              | 5.212423                | -2.810274 | 0.142464  |
| 48               | 6                | 0              | 4.858000                | -2.379968 | -1.146778 |
| 49               | 6                | 0              | 3.535853                | -2.000912 | -1.430232 |
| 50               | 6                | 0              | 0.260454                | -3.085335 | -1.679284 |
| 51               | 9                | 0              | -0.653888               | -2.774587 | -2.696377 |
| 52               | 9                | 0              | -0.347059               | -4.054294 | -0.914007 |
| 53               | 9                | 0              | 1.279773                | -3.716911 | -2.332010 |
| 54               | 1                | 0              | 1.639098                | 5.666021  | -1.912678 |
| 55               | 1                | 0              | 6.241102                | -3.105668 | 0.362417  |
| 56               | 1                | 0              | -0.830401               | 5.907083  | -1.981542 |
| 57               | 1                | 0              | 3.275844                | -1.679605 | -2.437858 |
| 58               | 1                | 0              | 5.611856                | -2.337363 | -1.937087 |
| 59               | 1                | 0              | 4.481858                | -3.232829 | 2.142537  |
| 60               | 1                | 0              | 2.153191                | -2.543528 | 1.644719  |
| 61               | 1                | 0              | 2.678824                | 3.584401  | -1.030664 |
| 62               | 1                | 0              | -4.683479               | -1.031431 | -1.302379 |
| 63               | 1                | 0              | -6.023748               | 0.834958  | -2.274679 |
| 64               | 1                | 0              | -5.172878               | 3.163523  | -2.210952 |
| 65               | 1                | 0              | 4.360199                | 1.462763  | 1.114566  |
| 66               | 1                | 0              | 6.561035                | 1.601301  | -0.030313 |
| 67               | 1                | 0              | 6.699932                | 1.407717  | -2.517795 |

|    |   |   |           |           |           |
|----|---|---|-----------|-----------|-----------|
| 68 | 1 | 0 | 4.612532  | 1.054391  | -3.853892 |
| 69 | 1 | 0 | 2.417634  | 0.847313  | -2.697956 |
| 70 | 1 | 0 | 3.161094  | -0.342168 | 2.104322  |
| 71 | 1 | 0 | 3.416207  | -0.027536 | 4.555245  |
| 72 | 1 | 0 | 2.093203  | 1.737949  | 5.739915  |
| 73 | 1 | 0 | 0.520579  | 3.184460  | 4.440333  |
| 74 | 1 | 0 | 0.301056  | 2.900876  | 1.984888  |
| 75 | 1 | 0 | 0.069993  | -1.827742 | 2.001430  |
| 76 | 1 | 0 | 0.375950  | -1.271526 | 4.412839  |
| 77 | 1 | 0 | -1.206264 | 0.294194  | 5.545721  |
| 78 | 1 | 0 | -3.108095 | 1.286522  | 4.259941  |
| 79 | 1 | 0 | -3.421576 | 0.710231  | 1.854811  |
| 80 | 1 | 0 | -3.370535 | -2.426518 | 2.186722  |
| 81 | 1 | 0 | -4.922806 | -4.362133 | 2.260270  |
| 82 | 1 | 0 | -5.479291 | -5.608842 | 0.164022  |
| 83 | 1 | 0 | -4.442768 | -4.909438 | -2.004041 |
| 84 | 1 | 0 | -2.853639 | -3.006893 | -2.067892 |
| 85 | 1 | 0 | -4.445827 | 5.147520  | -1.830428 |
| 86 | 1 | 0 | -2.955118 | 6.096904  | -1.746566 |
| 87 | 1 | 0 | -3.130310 | 4.833824  | -3.003097 |
| 88 | 1 | 0 | -4.187004 | 4.539020  | 0.612356  |
| 89 | 1 | 0 | -2.681828 | 3.773132  | 1.201067  |
| 90 | 1 | 0 | -2.664482 | 5.487559  | 0.686697  |

Xantphos-TS

SCF Done: E(RB97D) = -2288.38280396 A.U.

| Center<br>Number | Atomic<br>Number | Atomic<br>Type | Coordinates (Angstroms) |           |           |
|------------------|------------------|----------------|-------------------------|-----------|-----------|
|                  |                  |                | X                       | Y         | Z         |
| 1                | 6                | 0              | -0.790654               | -3.820747 | -2.652950 |
| 2                | 6                | 0              | -1.904651               | -2.876873 | -2.189744 |
| 3                | 6                | 0              | -1.669067               | -1.877694 | -1.233483 |
| 4                | 8                | 0              | -0.439472               | -1.678046 | -0.653869 |
| 5                | 6                | 0              | 0.661500                | -2.373304 | -1.097813 |
| 6                | 6                | 0              | 0.551161                | -3.432921 | -2.017707 |
| 7                | 6                | 0              | -3.215355               | -2.988925 | -2.692970 |
| 8                | 6                | 0              | -4.242607               | -2.140400 | -2.262414 |
| 9                | 6                | 0              | -3.977846               | -1.151146 | -1.300011 |
| 10               | 6                | 0              | -2.686237               | -1.013347 | -0.776032 |
| 11               | 6                | 0              | 1.729914                | -4.125566 | -2.347370 |
| 12               | 6                | 0              | 2.969110                | -3.768403 | -1.800675 |
| 13               | 6                | 0              | 3.051852                | -2.678216 | -0.921922 |
| 14               | 6                | 0              | 1.900336                | -1.958790 | -0.565541 |
| 15               | 15               | 0              | -2.196114               | 0.298109  | 0.487359  |
| 16               | 6                | 0              | -1.868494               | -0.747189 | 2.022395  |
| 17               | 15               | 0              | 1.980738                | -0.388108 | 0.516806  |
| 18               | 6                | 0              | 3.740233                | 0.175674  | 0.036190  |
| 19               | 46               | 0              | -0.491446               | 1.859071  | -0.192818 |
| 20               | 6                | 0              | 0.405190                | 2.070804  | -2.320309 |
| 21               | 9                | 0              | 1.524447                | 2.562274  | -2.950274 |
| 22               | 6                | 0              | 0.601180                | 3.449179  | -0.786674 |
| 23               | 6                | 0              | 1.883584                | 3.558107  | -0.203278 |
| 24               | 6                | 0              | 2.353034                | 4.819596  | 0.191106  |
| 25               | 6                | 0              | 1.579046                | 5.971163  | -0.041106 |
| 26               | 6                | 0              | 0.331490                | 5.864384  | -0.677774 |
| 27               | 6                | 0              | -0.151677               | 4.607071  | -1.077581 |
| 28               | 9                | 0              | -0.657688               | 2.445814  | -3.091176 |
| 29               | 9                | 0              | 0.552671                | 0.699413  | -2.480652 |
| 30               | 6                | 0              | -3.835807               | 1.147113  | 0.862763  |
| 31               | 6                | 0              | 2.272607                | -1.118744 | 2.242352  |
| 32               | 1                | 0              | -5.249001               | -2.249749 | -2.670275 |
| 33               | 1                | 0              | 1.958093                | 6.951831  | 0.254803  |
| 34               | 1                | 0              | -3.428993               | -3.760229 | -3.434912 |
| 35               | 1                | 0              | -1.101232               | 4.512837  | -1.604591 |
| 36               | 1                | 0              | -0.261560               | 6.760274  | -0.877112 |
| 37               | 1                | 0              | 3.331945                | 4.903692  | 0.669390  |
| 38               | 1                | 0              | 2.492525                | 2.668017  | -0.052403 |
| 39               | 1                | 0              | -4.771740               | -0.488548 | -0.954038 |
| 40               | 1                | 0              | 4.016645                | -2.367437 | -0.519660 |
| 41               | 1                | 0              | 3.867961                | -4.326404 | -2.069072 |
| 42               | 1                | 0              | 1.670046                | -4.958558 | -3.050114 |
| 43               | 6                | 0              | -0.662326               | -3.740394 | -4.200123 |
| 44               | 6                | 0              | -1.155107               | -5.274885 | -2.241962 |
| 45               | 6                | 0              | -4.840253               | 0.543692  | 1.641107  |
| 46               | 6                | 0              | -6.046042               | 1.223162  | 1.875120  |
| 47               | 6                | 0              | -6.250320               | 2.503018  | 1.331357  |
| 48               | 6                | 0              | -5.245416               | 3.107167  | 0.558065  |
| 49               | 6                | 0              | -4.036872               | 2.431490  | 0.325843  |
| 50               | 1                | 0              | -4.672280               | -0.446106 | 2.069507  |
| 51               | 1                | 0              | -6.823685               | 0.756101  | 2.483549  |
| 52               | 1                | 0              | -7.188670               | 3.030468  | 1.516197  |
| 53               | 1                | 0              | -5.398992               | 4.105139  | 0.141884  |
| 54               | 1                | 0              | -3.235460               | 2.891803  | -0.259805 |
| 55               | 6                | 0              | -1.023671               | -0.212024 | 3.009578  |
| 56               | 6                | 0              | -0.738673               | -0.951460 | 4.166288  |

|    |   |   |           |           |           |
|----|---|---|-----------|-----------|-----------|
| 57 | 6 | 0 | -1.284854 | -2.233474 | 4.332581  |
| 58 | 6 | 0 | -2.122456 | -2.773904 | 3.343323  |
| 59 | 6 | 0 | -2.415441 | -2.032237 | 2.187961  |
| 60 | 1 | 0 | -0.569167 | 0.768969  | 2.852801  |
| 61 | 1 | 0 | -0.057668 | -0.545448 | 4.913888  |
| 62 | 1 | 0 | -1.043769 | -2.816147 | 5.223943  |
| 63 | 1 | 0 | -2.542172 | -3.775049 | 3.466157  |
| 64 | 1 | 0 | -3.052646 | -2.455410 | 1.409001  |
| 65 | 6 | 0 | 2.571367  | -0.220940 | 3.288982  |
| 66 | 6 | 0 | 2.751179  | -0.688715 | 4.598535  |
| 67 | 6 | 0 | 2.601902  | -2.056950 | 4.883676  |
| 68 | 6 | 0 | 2.280219  | -2.949964 | 3.849991  |
| 69 | 6 | 0 | 2.125919  | -2.486342 | 2.533289  |
| 70 | 1 | 0 | 2.670635  | 0.846619  | 3.076396  |
| 71 | 1 | 0 | 2.999232  | 0.015028  | 5.396553  |
| 72 | 1 | 0 | 2.732108  | -2.421939 | 5.904799  |
| 73 | 1 | 0 | 2.157027  | -4.013934 | 4.064691  |
| 74 | 1 | 0 | 1.890932  | -3.187433 | 1.731424  |
| 75 | 6 | 0 | 4.864526  | 0.065813  | 0.874369  |
| 76 | 6 | 0 | 6.112640  | 0.554293  | 0.450280  |
| 77 | 6 | 0 | 6.248907  | 1.147907  | -0.814025 |
| 78 | 6 | 0 | 5.129525  | 1.250549  | -1.657234 |
| 79 | 6 | 0 | 3.881837  | 0.769058  | -1.236200 |
| 80 | 1 | 0 | 4.771067  | -0.400474 | 1.855563  |
| 81 | 1 | 0 | 6.979161  | 0.463542  | 1.109686  |
| 82 | 1 | 0 | 7.219196  | 1.528710  | -1.140160 |
| 83 | 1 | 0 | 5.222673  | 1.712253  | -2.642526 |
| 84 | 1 | 0 | 3.019101  | 0.862945  | -1.894951 |
| 85 | 1 | 0 | 0.126726  | -4.419665 | -4.557036 |
| 86 | 1 | 0 | -1.608622 | -4.033199 | -4.680394 |
| 87 | 1 | 0 | -0.411626 | -2.715161 | -4.510702 |
| 88 | 1 | 0 | -0.372915 | -5.975014 | -2.575305 |
| 89 | 1 | 0 | -1.253687 | -5.353688 | -1.148445 |
| 90 | 1 | 0 | -2.109767 | -5.573175 | -2.703207 |

**OO-CP**

SCF Done: E(RB+HF-LYP) = -926.259488151 A.U.

| Center<br>Number | Atomic<br>Number | Atomic<br>Type | Coordinates (Angstroms) |           |           |
|------------------|------------------|----------------|-------------------------|-----------|-----------|
|                  |                  |                | X                       | Y         | Z         |
| 1                | 6                | 0              | 2.399157                | 0.438430  | -0.745448 |
| 2                | 6                | 0              | 3.749533                | 0.075566  | -0.761063 |
| 3                | 6                | 0              | 4.191899                | -1.038709 | -0.045324 |
| 4                | 6                | 0              | 3.273296                | -1.793711 | 0.685533  |
| 5                | 6                | 0              | 1.919974                | -1.438555 | 0.697265  |
| 6                | 6                | 0              | 1.467757                | -0.322224 | -0.024292 |
| 7                | 46               | 0              | -0.503616               | -0.018153 | -0.067947 |
| 8                | 6                | 0              | -0.268070               | 1.932301  | 0.215160  |
| 9                | 9                | 0              | -1.519378               | 2.413588  | 0.571229  |
| 10               | 8                | 0              | -1.202928               | -2.239258 | -0.211495 |
| 11               | 6                | 0              | -2.560525               | -2.312268 | 0.254121  |
| 12               | 6                | 0              | -3.430870               | -1.226240 | -0.370999 |
| 13               | 8                | 0              | -2.842706               | 0.071401  | -0.225971 |
| 14               | 9                | 0              | 0.085783                | 2.638062  | -0.894488 |
| 15               | 9                | 0              | 0.565027                | 2.333686  | 1.200273  |
| 16               | 1                | 0              | 5.243681                | -1.313947 | -0.053643 |
| 17               | 1                | 0              | 1.220391                | -2.043336 | 1.268953  |
| 18               | 1                | 0              | 3.606761                | -2.660327 | 1.252749  |
| 19               | 1                | 0              | 4.458194                | 0.672677  | -1.330968 |
| 20               | 1                | 0              | 2.076959                | 1.318373  | -1.291984 |
| 21               | 1                | 0              | -1.153448               | -2.526823 | -1.138469 |
| 22               | 1                | 0              | -3.120141               | 0.501021  | 0.598892  |
| 23               | 1                | 0              | -2.982117               | -3.305558 | 0.051014  |
| 24               | 1                | 0              | -2.492977               | -2.180345 | 1.337413  |
| 25               | 1                | 0              | -3.521859               | -1.387683 | -1.450710 |
| 26               | 1                | 0              | -4.439825               | -1.251730 | 0.059225  |

**OO-TS**

SCF Done: E(RB+HF-LYP) = -926.212598570 A.U.

| Center<br>Number | Atomic<br>Number | Atomic<br>Type | Coordinates (Angstroms) |           |           |
|------------------|------------------|----------------|-------------------------|-----------|-----------|
|                  |                  |                | X                       | Y         | Z         |
| 1                | 6                | 0              | 2.403188                | -0.255798 | -0.998284 |
| 2                | 6                | 0              | 3.648719                | -0.830041 | -0.733223 |
| 3                | 6                | 0              | 4.003359                | -1.168815 | 0.574380  |
| 4                | 6                | 0              | 3.114126                | -0.926939 | 1.627367  |
| 5                | 6                | 0              | 1.870139                | -0.349831 | 1.377629  |
| 6                | 6                | 0              | 1.490062                | -0.055908 | 0.052693  |
| 7                | 46               | 0              | -0.399097               | -0.537622 | -0.372919 |
| 8                | 6                | 0              | 0.433098                | 1.573938  | -0.171717 |
| 9                | 9                | 0              | -0.871152               | 2.047028  | 0.082844  |
| 10               | 8                | 0              | -2.827657               | 0.438495  | 1.595102  |
| 11               | 6                | 0              | -3.850238               | 0.027720  | 0.714451  |



|    |   |   |           |           |           |
|----|---|---|-----------|-----------|-----------|
| 12 | 6 | 0 | -3.561456 | -1.300361 | 0.020675  |
| 13 | 8 | 0 | -2.495730 | -1.227831 | -0.952427 |
| 14 | 9 | 0 | 0.713110  | 2.014672  | -1.417269 |
| 15 | 9 | 0 | 1.161471  | 2.319289  | 0.691523  |
| 16 | 1 | 0 | 4.978396  | -1.603578 | 0.777188  |
| 17 | 1 | 0 | 1.195509  | -0.125806 | 2.198455  |
| 18 | 1 | 0 | 3.396753  | -1.176668 | 2.646829  |
| 19 | 1 | 0 | 4.345224  | -1.003294 | -1.549627 |
| 20 | 1 | 0 | 2.138538  | 0.038275  | -2.008481 |
| 21 | 1 | 0 | -2.133155 | 0.890983  | 1.087071  |
| 22 | 1 | 0 | -2.786358 | -0.669217 | -1.690589 |
| 23 | 1 | 0 | -4.757950 | -0.103374 | 1.317100  |
| 24 | 1 | 0 | -4.075822 | 0.799562  | -0.041946 |
| 25 | 1 | 0 | -3.226399 | -2.035990 | 0.754809  |
| 26 | 1 | 0 | -4.466011 | -1.678297 | -0.475630 |

**NN-CP**

SCF Done: E(RB+HF-LYP) = -886.563594161 A.U.

| Center<br>Number | Atomic<br>Number | Atomic<br>Type | Coordinates (Angstroms) |           |           |
|------------------|------------------|----------------|-------------------------|-----------|-----------|
|                  |                  |                | X                       | Y         | Z         |
| 1                | 6                | 0              | 1.440802                | -0.280480 | -0.009459 |
| 2                | 6                | 0              | 2.275108                | 0.221409  | -1.021315 |
| 3                | 6                | 0              | 3.636831                | -0.096268 | -1.056441 |
| 4                | 6                | 0              | 4.200616                | -0.908913 | -0.070456 |
| 5                | 6                | 0              | 3.390327                | -1.400503 | 0.954051  |
| 6                | 6                | 0              | 2.026144                | -1.088997 | 0.981679  |
| 7                | 46               | 0              | -0.558521               | -0.045167 | -0.005773 |
| 8                | 7                | 0              | -2.811830               | -0.042387 | 0.010190  |
| 9                | 6                | 0              | -3.296441               | -1.354197 | -0.461783 |
| 10               | 6                | 0              | -2.414996               | -2.471456 | 0.106126  |
| 11               | 7                | 0              | -0.999884               | -2.223068 | -0.245823 |
| 12               | 6                | 0              | -0.342344               | 1.940563  | 0.174299  |
| 13               | 9                | 0              | 0.310681                | 2.385766  | 1.277945  |
| 14               | 9                | 0              | -1.609308               | 2.515870  | 0.257169  |
| 15               | 9                | 0              | 0.244572                | 2.565931  | -0.887774 |
| 16               | 1                | 0              | 5.260757                | -1.149309 | -0.095746 |
| 17               | 1                | 0              | 1.420684                | -1.471560 | 1.802761  |
| 18               | 1                | 0              | 3.818834                | -2.021889 | 1.738255  |
| 19               | 1                | 0              | 4.261103                | 0.301614  | -1.854138 |
| 20               | 1                | 0              | 1.865280                | 0.879881  | -1.781003 |
| 21               | 1                | 0              | -2.775723               | -3.445704 | -0.252135 |
| 22               | 1                | 0              | -2.484893               | -2.475216 | 1.199480  |
| 23               | 1                | 0              | -3.229923               | -1.355176 | -1.555465 |
| 24               | 1                | 0              | -4.345731               | -1.542992 | -0.195326 |
| 25               | 1                | 0              | -3.112899               | 0.153642  | 0.963680  |
| 26               | 1                | 0              | -3.141628               | 0.729795  | -0.563881 |
| 27               | 1                | 0              | -0.360097               | -2.777697 | 0.320502  |
| 28               | 1                | 0              | -0.811584               | -2.464567 | -1.218267 |

**NN-TS**

SCF Done: E(RB+HF-LYP) = -886.502413473 A.U.

| Center<br>Number | Atomic<br>Number | Atomic<br>Type | Coordinates (Angstroms) |           |           |
|------------------|------------------|----------------|-------------------------|-----------|-----------|
|                  |                  |                | X                       | Y         | Z         |
| 1                | 6                | 0              | -1.295177               | -0.188183 | -0.017058 |
| 2                | 6                | 0              | -1.852415               | -0.606407 | 1.212945  |
| 3                | 6                | 0              | -2.856365               | -1.574586 | 1.244644  |
| 4                | 6                | 0              | -3.357798               | -2.116070 | 0.057504  |
| 5                | 6                | 0              | -2.854109               | -1.668400 | -1.169264 |
| 6                | 6                | 0              | -1.853120               | -0.700033 | -1.212768 |
| 7                | 46               | 0              | 0.692616                | 0.118739  | -0.027876 |
| 8                | 7                | 0              | 2.949456                | 0.761886  | -0.037905 |
| 9                | 6                | 0              | 3.791895                | -0.372310 | 0.377842  |
| 10               | 6                | 0              | 3.322213                | -1.668756 | -0.292052 |
| 11               | 7                | 0              | 1.915416                | -1.936322 | 0.034591  |
| 12               | 6                | 0              | -0.994012               | 1.694199  | -0.026223 |
| 13               | 9                | 0              | -2.298948               | 2.024313  | -0.252607 |
| 14               | 9                | 0              | -0.328406               | 2.457532  | -0.961494 |
| 15               | 9                | 0              | -0.717792               | 2.220191  | 1.203766  |
| 16               | 1                | 0              | -4.149687               | -2.859913 | 0.085669  |
| 17               | 1                | 0              | -1.492854               | -0.334581 | -2.170877 |
| 18               | 1                | 0              | -3.253207               | -2.069769 | -2.098446 |
| 19               | 1                | 0              | -3.256883               | -1.900759 | 2.202201  |
| 20               | 1                | 0              | -1.493629               | -0.162597 | 2.137227  |
| 21               | 1                | 0              | 4.001737                | -2.485028 | -0.001307 |
| 22               | 1                | 0              | 3.394222                | -1.559828 | -1.380729 |
| 23               | 1                | 0              | 3.695587                | -0.471161 | 1.465295  |
| 24               | 1                | 0              | 4.859181                | -0.220574 | 0.155280  |
| 25               | 1                | 0              | 3.186424                | 1.065549  | -0.980878 |
| 26               | 1                | 0              | 3.085490                | 1.563153  | 0.572967  |
| 27               | 1                | 0              | 1.494542                | -2.597535 | -0.612006 |
| 28               | 1                | 0              | 1.814292                | -2.322922 | 0.970702  |

**ON-CP**

SCF Done: E(RB+HF-LYP) = -906.411900779 A.U.

| Center<br>Number | Atomic<br>Number | Atomic<br>Type | Coordinates (Angstroms) |           |           |
|------------------|------------------|----------------|-------------------------|-----------|-----------|
|                  |                  |                | X                       | Y         | Z         |
| 1                | 6                | 0              | -1.457741               | -0.269900 | -0.005886 |
| 2                | 6                | 0              | -2.314168               | 0.341342  | 0.922881  |
| 3                | 6                | 0              | -3.666959               | -0.008337 | 0.987402  |
| 4                | 6                | 0              | -4.193661               | -0.962090 | 0.114292  |
| 5                | 6                | 0              | -3.356381               | -1.567973 | -0.824147 |
| 6                | 6                | 0              | -2.001389               | -1.224683 | -0.883195 |
| 7                | 46               | 0              | 0.536453                | -0.028876 | -0.065823 |
| 8                | 7                | 0              | 2.801041                | -0.053377 | -0.045796 |
| 9                | 6                | 0              | 3.258201                | -1.297162 | 0.600231  |
| 10               | 6                | 0              | 2.480271                | -2.485184 | 0.033630  |
| 11               | 8                | 0              | 1.057918                | -2.295598 | 0.117965  |
| 12               | 6                | 0              | 0.336056                | 1.949528  | -0.156754 |
| 13               | 9                | 0              | -0.388457               | 2.436986  | -1.189420 |
| 14               | 9                | 0              | 1.602098                | 2.501222  | -0.310801 |
| 15               | 9                | 0              | -0.158006               | 2.537963  | 0.969433  |
| 16               | 1                | 0              | -5.247175               | -1.227253 | 0.161389  |
| 17               | 1                | 0              | -1.367980               | -1.712763 | -1.621098 |
| 18               | 1                | 0              | -3.756214               | -2.307011 | -1.515688 |
| 19               | 1                | 0              | -4.312152               | 0.473799  | 1.719127  |
| 20               | 1                | 0              | -1.929929               | 1.103234  | 1.592764  |
| 21               | 1                | 0              | 0.742690                | -2.515405 | 1.009919  |
| 22               | 1                | 0              | 2.772825                | -3.413747 | 0.538010  |
| 23               | 1                | 0              | 2.688618                | -2.601692 | -1.034551 |
| 24               | 1                | 0              | 3.062151                | -1.202104 | 1.673752  |
| 25               | 1                | 0              | 4.336015                | -1.478574 | 0.472573  |
| 26               | 1                | 0              | 3.155378                | 0.029143  | -0.998099 |
| 27               | 1                | 0              | 3.102205                | 0.780318  | 0.452978  |

**ON-TS**

SCF Done: E(RB+HF-LYP) = -906.359201102 A.U.

| Center<br>Number | Atomic<br>Number | Atomic<br>Type | Coordinates (Angstroms) |           |           |
|------------------|------------------|----------------|-------------------------|-----------|-----------|
|                  |                  |                | X                       | Y         | Z         |
| 1                | 6                | 0              | -1.298000               | -0.239187 | -0.026245 |
| 2                | 6                | 0              | -1.724273               | -0.756317 | 1.212562  |
| 3                | 6                | 0              | -2.623600               | -1.824605 | 1.253939  |
| 4                | 6                | 0              | -3.135211               | -2.360664 | 0.070182  |
| 5                | 6                | 0              | -2.751940               | -1.819319 | -1.162230 |
| 6                | 6                | 0              | -1.859118               | -0.750530 | -1.215094 |
| 7                | 46               | 0              | 0.643149                | 0.236725  | -0.140514 |
| 8                | 7                | 0              | 2.851262                | 0.755316  | -0.167969 |
| 9                | 6                | 0              | 3.691770                | -0.241525 | 0.524577  |
| 10               | 6                | 0              | 3.506497                | -1.636803 | -0.076132 |
| 11               | 8                | 0              | 2.155723                | -2.068430 | -0.139038 |
| 12               | 6                | 0              | -1.097516               | 1.703271  | 0.056850  |
| 13               | 9                | 0              | -2.403872               | 1.936088  | -0.253051 |
| 14               | 9                | 0              | -0.440649               | 2.633134  | -0.720219 |
| 15               | 9                | 0              | -0.954842               | 2.099377  | 1.350227  |
| 16               | 1                | 0              | -3.844564               | -3.183280 | 0.106048  |
| 17               | 1                | 0              | -1.588315               | -0.313088 | -2.171790 |
| 18               | 1                | 0              | -3.159092               | -2.226679 | -2.084574 |
| 19               | 1                | 0              | -2.933789               | -2.230268 | 2.214162  |
| 20               | 1                | 0              | -1.359535               | -0.312033 | 2.133613  |
| 21               | 1                | 0              | 1.793555                | -2.134133 | 0.760316  |
| 22               | 1                | 0              | 4.131936                | -2.348039 | 0.484606  |
| 23               | 1                | 0              | 3.856280                | -1.643817 | -1.114692 |
| 24               | 1                | 0              | 3.390789                | -0.244202 | 1.578573  |
| 25               | 1                | 0              | 4.763475                | 0.011541  | 0.488150  |
| 26               | 1                | 0              | 3.152863                | 0.863182  | -1.136127 |
| 27               | 1                | 0              | 2.949565                | 1.668372  | 0.270351  |

reductive elimination of Brettphos

**CP-Obound**

SCF Done: E(RB97D) = -2217.50616228 A.U.

| Center<br>Number | Atomic<br>Number | Atomic<br>Type | Coordinates (Angstroms) |           |          |
|------------------|------------------|----------------|-------------------------|-----------|----------|
|                  |                  |                | X                       | Y         | Z        |
| 1                | 6                | 0              | 1.874319                | -0.029896 | 2.937698 |
| 2                | 6                | 0              | 0.623297                | -0.654266 | 2.284194 |
| 3                | 6                | 0              | 0.640751                | -2.182771 | 2.492206 |
| 4                | 6                | 0              | 0.674236                | -2.519114 | 3.997487 |
| 5                | 6                | 0              | 1.894185                | -1.877244 | 4.686795 |
| 6                | 6                | 0              | 1.922212                | -0.355576 | 4.444561 |
| 7                | 15               | 0              | 0.585731                | -0.150016 | 0.415472 |
| 8                | 6                | 0              | -0.381100               | 1.493430  | 0.308014 |

|    |    |   |           |           |           |
|----|----|---|-----------|-----------|-----------|
| 9  | 6  | 0 | 0.179059  | 2.513782  | 1.321100  |
| 10 | 6  | 0 | -0.569295 | 3.855920  | 1.165513  |
| 11 | 6  | 0 | -0.458504 | 4.394753  | -0.274762 |
| 12 | 6  | 0 | -0.994944 | 3.361427  | -1.286321 |
| 13 | 6  | 0 | -0.254161 | 2.019783  | -1.131465 |
| 14 | 46 | 0 | 2.809981  | -0.309815 | -0.567506 |
| 15 | 6  | 0 | 3.399743  | 1.587075  | -0.336186 |
| 16 | 6  | 0 | 3.283131  | 2.505465  | -1.397806 |
| 17 | 6  | 0 | 3.537475  | 3.872884  | -1.189436 |
| 18 | 6  | 0 | 3.946958  | 4.335229  | 0.072026  |
| 19 | 6  | 0 | 4.122104  | 3.414512  | 1.117523  |
| 20 | 6  | 0 | 3.859345  | 2.047327  | 0.913342  |
| 21 | 1  | 0 | 4.145182  | 5.397344  | 0.232881  |
| 22 | 6  | 0 | 4.640373  | -0.643321 | -1.445163 |
| 23 | 9  | 0 | 5.700716  | -0.689692 | -0.565637 |
| 24 | 8  | 0 | 1.845035  | -2.527640 | -0.558445 |
| 25 | 6  | 0 | 2.693032  | -3.689283 | -0.603757 |
| 26 | 6  | 0 | -0.362922 | -1.593857 | -0.392940 |
| 27 | 6  | 0 | 0.475988  | -2.699350 | -0.711703 |
| 28 | 6  | 0 | -0.069229 | -3.914348 | -1.137922 |
| 29 | 6  | 0 | -1.459614 | -4.061524 | -1.236002 |
| 30 | 6  | 0 | -2.299545 | -2.979328 | -0.945855 |
| 31 | 6  | 0 | -1.760345 | -1.717658 | -0.566357 |
| 32 | 8  | 0 | -3.673031 | -3.048384 | -0.993237 |
| 33 | 6  | 0 | -4.261101 | -4.281634 | -1.405823 |
| 34 | 6  | 0 | -2.721238 | -0.569366 | -0.422473 |
| 35 | 6  | 0 | -3.078751 | 0.182037  | -1.575883 |
| 36 | 6  | 0 | -3.966911 | 1.261212  | -1.422420 |
| 37 | 6  | 0 | -4.511834 | 1.613553  | -0.180488 |
| 38 | 6  | 0 | -4.169868 | 0.835704  | 0.936102  |
| 39 | 6  | 0 | -3.287203 | -0.251359 | 0.839651  |
| 40 | 6  | 0 | -2.564309 | -0.171908 | -2.976105 |
| 41 | 6  | 0 | -3.531541 | -1.160578 | -3.673763 |
| 42 | 6  | 0 | -5.412763 | 2.833278  | -0.040322 |
| 43 | 6  | 0 | -4.694121 | 3.947371  | 0.755919  |
| 44 | 6  | 0 | -2.956254 | -1.067299 | 2.086489  |
| 45 | 6  | 0 | -2.829484 | -0.209393 | 3.364314  |
| 46 | 9  | 0 | 5.023773  | 0.202420  | -2.453169 |
| 47 | 9  | 0 | 4.617839  | -1.916107 | -2.042258 |
| 48 | 6  | 0 | -2.369443 | 1.043907  | -3.912271 |
| 49 | 6  | 0 | -6.767327 | 2.482160  | 0.612745  |
| 50 | 6  | 0 | -4.009680 | -2.179235 | 2.301741  |
| 51 | 1  | 0 | 0.571051  | -4.758103 | -1.387304 |
| 52 | 1  | 0 | -1.866518 | -5.022125 | -1.546940 |
| 53 | 1  | 0 | -4.231470 | 1.861884  | -2.294179 |
| 54 | 1  | 0 | -4.589627 | 1.095150  | 1.908724  |
| 55 | 1  | 0 | 2.329058  | -4.440545 | 0.116236  |
| 56 | 1  | 0 | 3.689185  | -3.329916 | -0.336962 |
| 57 | 1  | 0 | 2.713974  | -4.111807 | -1.620237 |
| 58 | 1  | 0 | -3.951628 | -4.544989 | -2.433070 |
| 59 | 1  | 0 | -5.345065 | -4.115945 | -1.373885 |
| 60 | 1  | 0 | -3.986132 | -5.103005 | -0.720296 |
| 61 | 1  | 0 | -1.590239 | -0.673194 | -2.863116 |
| 62 | 1  | 0 | -3.341623 | 1.459445  | -4.224239 |
| 63 | 1  | 0 | -1.845854 | 0.716015  | -4.824183 |
| 64 | 1  | 0 | -1.789066 | 1.852178  | -3.447661 |
| 65 | 1  | 0 | -4.513450 | -0.678277 | -3.813869 |
| 66 | 1  | 0 | -3.680892 | -2.068372 | -3.079815 |
| 67 | 1  | 0 | -3.138109 | -1.436703 | -4.666377 |
| 68 | 1  | 0 | -5.613872 | 3.218695  | -1.054997 |
| 69 | 1  | 0 | -7.290734 | 1.699478  | 0.041179  |
| 70 | 1  | 0 | -7.412422 | 3.374673  | 0.662354  |
| 71 | 1  | 0 | -6.620410 | 2.113228  | 1.640962  |
| 72 | 1  | 0 | -4.466082 | 3.600762  | 1.777401  |
| 73 | 1  | 0 | -5.330698 | 4.844676  | 0.830719  |
| 74 | 1  | 0 | -3.744938 | 4.226690  | 0.272660  |
| 75 | 1  | 0 | -1.988657 | -1.557388 | 1.916422  |
| 76 | 1  | 0 | -4.997569 | -1.727397 | 2.492029  |
| 77 | 1  | 0 | -3.739577 | -2.800855 | 3.172311  |
| 78 | 1  | 0 | -4.090987 | -2.818899 | 1.412710  |
| 79 | 1  | 0 | -3.815353 | 0.143079  | 3.708176  |
| 80 | 1  | 0 | -2.194374 | 0.675283  | 3.199532  |
| 81 | 1  | 0 | -2.391049 | -0.811353 | 4.176277  |
| 82 | 1  | 0 | 2.982222  | 2.156025  | -2.385901 |
| 83 | 1  | 0 | 3.423493  | 4.574230  | -2.020362 |
| 84 | 1  | 0 | 4.466251  | 3.755700  | 2.097722  |
| 85 | 1  | 0 | 3.997101  | 1.345945  | 1.735591  |
| 86 | 1  | 0 | -1.435130 | 1.314905  | 0.545056  |
| 87 | 1  | 0 | 0.054525  | 2.138418  | 2.349708  |
| 88 | 1  | 0 | 1.255233  | 2.667571  | 1.143282  |
| 89 | 1  | 0 | -1.634772 | 3.703960  | 1.416260  |
| 90 | 1  | 0 | -0.162757 | 4.588580  | 1.882513  |
| 91 | 1  | 0 | 0.603326  | 4.599585  | -0.497204 |
| 92 | 1  | 0 | -1.008575 | 5.346675  | -0.368072 |
| 93 | 1  | 0 | -0.876042 | 3.736185  | -2.317314 |
| 94 | 1  | 0 | -2.073477 | 3.198824  | -1.117625 |
| 95 | 1  | 0 | 0.811736  | 2.164416  | -1.358506 |

|     |   |   |           |           |           |
|-----|---|---|-----------|-----------|-----------|
| 96  | 1 | 0 | -0.641762 | 1.269799  | -1.832505 |
| 97  | 1 | 0 | -0.282304 | -0.238263 | 2.749934  |
| 98  | 1 | 0 | 1.540467  | -2.590690 | 2.001824  |
| 99  | 1 | 0 | -0.228124 | -2.660294 | 2.016703  |
| 100 | 1 | 0 | -0.251910 | -2.142151 | 4.468720  |
| 101 | 1 | 0 | 0.684714  | -3.613769 | 4.134012  |
| 102 | 1 | 0 | 1.885127  | -2.096915 | 5.767507  |
| 103 | 1 | 0 | 2.815661  | -2.323267 | 4.270331  |
| 104 | 1 | 0 | 2.825807  | 0.089739  | 4.893278  |
| 105 | 1 | 0 | 1.050067  | 0.108220  | 4.941405  |
| 106 | 1 | 0 | 2.763716  | -0.444444 | 2.430626  |
| 107 | 1 | 0 | 1.902941  | 1.056621  | 2.782631  |

CP-Cbound

SCF Done: E(RB97D) = -2217.51827901 A.U.

| Center<br>Number | Atomic<br>Number | Atomic<br>Type | Coordinates (Angstroms) |           |           |
|------------------|------------------|----------------|-------------------------|-----------|-----------|
|                  |                  |                | X                       | Y         | Z         |
| 1                | 6                | 0              | -3.699988               | 0.198022  | -0.286454 |
| 2                | 6                | 0              | -3.133768               | 0.639387  | 0.922197  |
| 3                | 6                | 0              | -1.931849               | 1.366259  | 0.967348  |
| 4                | 6                | 0              | -1.279956               | 1.680584  | -0.257185 |
| 5                | 6                | 0              | -1.839763               | 1.264005  | -1.486867 |
| 6                | 6                | 0              | -3.041389               | 0.530164  | -1.475519 |
| 7                | 6                | 0              | -0.011311               | 2.481421  | -0.245092 |
| 8                | 6                | 0              | 1.259412                | 1.888158  | -0.100033 |
| 9                | 6                | 0              | 2.422382                | 2.702098  | -0.146536 |
| 10               | 6                | 0              | 2.309337                | 4.088195  | -0.316107 |
| 11               | 6                | 0              | 1.043180                | 4.682992  | -0.436026 |
| 12               | 6                | 0              | -0.111568               | 3.891506  | -0.397535 |
| 13               | 15               | 0              | 1.374973                | 0.018216  | 0.205220  |
| 14               | 6                | 0              | 2.415764                | -0.701883 | -1.270803 |
| 15               | 6                | 0              | 3.866901                | -1.095277 | -0.941032 |
| 16               | 6                | 0              | 4.481784                | -1.840177 | -2.147865 |
| 17               | 6                | 0              | 4.421975                | -0.979543 | -3.426126 |
| 18               | 6                | 0              | 2.975368                | -0.535828 | -3.722768 |
| 19               | 6                | 0              | 2.367203                | 0.205466  | -2.513521 |
| 20               | 8                | 0              | 3.627729                | 2.052259  | -0.016697 |
| 21               | 6                | 0              | 4.819946                | 2.833292  | -0.042480 |
| 22               | 8                | 0              | -1.390775               | 4.390077  | -0.493309 |
| 23               | 6                | 0              | -1.537409               | 5.800929  | -0.646367 |
| 24               | 6                | 0              | -1.403129               | 1.861523  | 2.310437  |
| 25               | 6                | 0              | -1.437469               | 0.781315  | 3.411371  |
| 26               | 6                | 0              | -1.215461               | 1.638636  | -2.829690 |
| 27               | 6                | 0              | -2.025299               | 2.780949  | -3.487190 |
| 28               | 6                | 0              | -5.004985               | -0.585611 | -0.242601 |
| 29               | 6                | 0              | -6.189428               | 0.383235  | -0.011074 |
| 30               | 46               | 0              | -0.691488               | -1.326175 | 0.657245  |
| 31               | 6                | 0              | -2.154621               | -2.633834 | 1.259333  |
| 32               | 9                | 0              | -2.932355               | -2.029780 | 2.252641  |
| 33               | 6                | 0              | -0.048068               | -2.819324 | -0.509136 |
| 34               | 6                | 0              | 0.901302                | -3.768936 | -0.095618 |
| 35               | 6                | 0              | 1.484761                | -4.635681 | -1.038848 |
| 36               | 6                | 0              | 1.102186                | -4.580664 | -2.389157 |
| 37               | 6                | 0              | 0.105769                | -3.673785 | -2.788500 |
| 38               | 6                | 0              | -0.480017               | -2.805390 | -1.849936 |
| 39               | 1                | 0              | 1.560502                | -5.251889 | -3.118843 |
| 40               | 9                | 0              | -1.694979               | -3.792868 | 1.839441  |
| 41               | 9                | 0              | -3.057598               | -3.033995 | 0.296440  |
| 42               | 6                | 0              | 2.516882                | -0.142304 | 1.755022  |
| 43               | 6                | 0              | 2.191419                | 0.919942  | 2.820647  |
| 44               | 6                | 0              | 3.089402                | 0.736545  | 4.062769  |
| 45               | 6                | 0              | 2.942752                | -0.681972 | 4.647594  |
| 46               | 6                | 0              | 3.263147                | -1.745259 | 3.579391  |
| 47               | 6                | 0              | 2.372522                | -1.564929 | 2.332432  |
| 48               | 6                | 0              | -2.197453               | 3.113888  | 2.749577  |
| 49               | 6                | 0              | -1.097739               | 0.442411  | -3.799680 |
| 50               | 6                | 0              | -5.251729               | -1.454192 | -1.488747 |
| 51               | 1                | 0              | 2.236465                | -5.359126 | -0.711725 |
| 52               | 1                | 0              | -0.223887               | -3.641919 | -3.830418 |
| 53               | 1                | 0              | -1.255158               | -2.106286 | -2.162599 |
| 54               | 1                | 0              | 1.197087                | -3.826888 | 0.951063  |
| 55               | 1                | 0              | 3.549428                | 0.008570  | 1.413063  |
| 56               | 1                | 0              | 1.870264                | -1.623999 | -1.506811 |
| 57               | 1                | 0              | 1.139138                | 0.817319  | 3.124357  |
| 58               | 1                | 0              | 2.316735                | 1.930676  | 2.405623  |
| 59               | 1                | 0              | 1.314017                | -1.740402 | 2.596884  |
| 60               | 1                | 0              | 2.629617                | -2.313698 | 1.568978  |
| 61               | 1                | 0              | 4.454731                | -0.189813 | -0.721284 |
| 62               | 1                | 0              | 3.905827                | -1.742447 | -0.052246 |
| 63               | 1                | 0              | 2.938791                | 1.126171  | -2.314596 |
| 64               | 1                | 0              | 1.333481                | 0.501234  | -2.733599 |
| 65               | 1                | 0              | 3.193805                | 4.722229  | -0.354557 |
| 66               | 1                | 0              | 4.143534                | 0.902513  | 3.772936  |
| 67               | 1                | 0              | 2.836126                | 1.496574  | 4.821302  |

|     |   |   |           |           |           |
|-----|---|---|-----------|-----------|-----------|
| 68  | 1 | 0 | 3.127316  | -2.759749 | 3.989938  |
| 69  | 1 | 0 | 4.324547  | -1.652335 | 3.283147  |
| 70  | 1 | 0 | 5.524375  | -2.122502 | -1.921919 |
| 71  | 1 | 0 | 3.914500  | -2.773725 | -2.309966 |
| 72  | 1 | 0 | 2.358679  | -1.426448 | -3.938415 |
| 73  | 1 | 0 | 2.944296  | 0.111305  | -4.615974 |
| 74  | 1 | 0 | 0.980169  | 5.763235  | -0.558150 |
| 75  | 1 | 0 | 4.926149  | 3.367134  | -1.003632 |
| 76  | 1 | 0 | 5.643715  | 2.118531  | 0.078623  |
| 77  | 1 | 0 | 4.833653  | 3.566580  | 0.783471  |
| 78  | 1 | 0 | 1.902355  | -0.822177 | 4.993465  |
| 79  | 1 | 0 | 3.598921  | -0.806911 | 5.525248  |
| 80  | 1 | 0 | 5.051134  | -0.080847 | -3.284348 |
| 81  | 1 | 0 | 4.837648  | -1.536350 | -4.282876 |
| 82  | 1 | 0 | -0.354885 | 2.164872  | 2.177203  |
| 83  | 1 | 0 | -3.637005 | 0.384166  | 1.853374  |
| 84  | 1 | 0 | -3.461376 | 0.201566  | -2.425895 |
| 85  | 1 | 0 | -0.199788 | 2.018098  | -2.644499 |
| 86  | 1 | 0 | -1.105462 | 6.341989  | 0.214838  |
| 87  | 1 | 0 | -2.618342 | 5.981799  | -0.696617 |
| 88  | 1 | 0 | -1.054294 | 6.154069  | -1.575266 |
| 89  | 1 | 0 | -2.152776 | 3.889661  | 1.970949  |
| 90  | 1 | 0 | -1.790226 | 3.522170  | 3.690085  |
| 91  | 1 | 0 | -3.255946 | 2.852355  | 2.914773  |
| 92  | 1 | 0 | -2.466547 | 0.481904  | 3.657618  |
| 93  | 1 | 0 | -0.966126 | 1.169204  | 4.329535  |
| 94  | 1 | 0 | -0.896095 | -0.129104 | 3.102765  |
| 95  | 1 | 0 | -0.554687 | -0.397572 | -3.343113 |
| 96  | 1 | 0 | -0.560138 | 0.752420  | -4.710964 |
| 97  | 1 | 0 | -2.091628 | 0.079081  | -4.106615 |
| 98  | 1 | 0 | -3.051236 | 2.440724  | -3.705459 |
| 99  | 1 | 0 | -1.554898 | 3.090595  | -4.435884 |
| 100 | 1 | 0 | -2.086549 | 3.647893  | -2.814177 |
| 101 | 1 | 0 | -4.937421 | -1.258365 | 0.626436  |
| 102 | 1 | 0 | -5.422780 | -0.829798 | -2.382120 |
| 103 | 1 | 0 | -6.149453 | -2.074581 | -1.339007 |
| 104 | 1 | 0 | -4.394681 | -2.116170 | -1.677620 |
| 105 | 1 | 0 | -6.040510 | 0.980138  | 0.903161  |
| 106 | 1 | 0 | -7.134568 | -0.176922 | 0.086181  |
| 107 | 1 | 0 | -6.283894 | 1.079210  | -0.861760 |

TS-Obound

SCF Done: E(RB97D) = -2217.46490992 A.U.

| Center<br>Number | Atomic<br>Number | Atomic<br>Type | Coordinates (Angstroms) |           |           |
|------------------|------------------|----------------|-------------------------|-----------|-----------|
|                  |                  |                | X                       | Y         | Z         |
| 1                | 6                | 0              | 1.939384                | -0.488090 | 2.746290  |
| 2                | 6                | 0              | 0.593389                | -0.945868 | 2.143347  |
| 3                | 6                | 0              | 0.432339                | -2.466162 | 2.344196  |
| 4                | 6                | 0              | 0.477689                | -2.813263 | 3.847342  |
| 5                | 6                | 0              | 1.790690                | -2.329579 | 4.494893  |
| 6                | 6                | 0              | 1.999725                | -0.821890 | 4.251044  |
| 7                | 15               | 0              | 0.520153                | -0.406122 | 0.285939  |
| 8                | 6                | 0              | -0.247777               | 1.347543  | 0.279201  |
| 9                | 6                | 0              | 0.425662                | 2.229706  | 1.350749  |
| 10               | 6                | 0              | -0.159618               | 3.657572  | 1.284858  |
| 11               | 6                | 0              | 0.015364                | 4.271671  | -0.118302 |
| 12               | 6                | 0              | -0.614937               | 3.368234  | -1.197634 |
| 13               | 6                | 0              | -0.030767               | 1.944606  | -1.121741 |
| 14               | 46               | 0              | 2.724797                | -0.413703 | -0.612948 |
| 15               | 6                | 0              | 3.898550                | 1.243317  | -0.503808 |
| 16               | 6                | 0              | 3.697102                | 2.203421  | -1.529436 |
| 17               | 6                | 0              | 3.711529                | 3.570462  | -1.224877 |
| 18               | 6                | 0              | 3.984911                | 4.009468  | 0.083857  |
| 19               | 6                | 0              | 4.265255                | 3.063125  | 1.084558  |
| 20               | 6                | 0              | 4.247916                | 1.691060  | 0.794134  |
| 21               | 1                | 0              | 4.003719                | 5.076632  | 0.313327  |
| 22               | 6                | 0              | 5.014946                | -0.287150 | -1.049370 |
| 23               | 9                | 0              | 5.529208                | -0.901453 | 0.061455  |
| 24               | 8                | 0              | 1.406523                | -2.920014 | -0.759028 |
| 25               | 6                | 0              | 2.165938                | -3.890400 | -1.486581 |
| 26               | 6                | 0              | -0.636256               | -1.701595 | -0.499815 |
| 27               | 6                | 0              | 0.038881                | -2.890090 | -0.911603 |
| 28               | 6                | 0              | -0.677777               | -3.982036 | -1.416039 |
| 29               | 6                | 0              | -2.077142               | -3.938487 | -1.476958 |
| 30               | 6                | 0              | -2.756002               | -2.782743 | -1.071042 |
| 31               | 6                | 0              | -2.043035               | -1.632974 | -0.630337 |
| 32               | 8                | 0              | -4.129737               | -2.669447 | -1.061653 |
| 33               | 6                | 0              | -4.887368               | -3.775461 | -1.548116 |
| 34               | 6                | 0              | -2.841362               | -0.381128 | -0.393179 |
| 35               | 6                | 0              | -3.131867               | 0.472836  | -1.493382 |
| 36               | 6                | 0              | -3.871085               | 1.644583  | -1.253915 |
| 37               | 6                | 0              | -4.328785               | 1.995242  | 0.023321  |
| 38               | 6                | 0              | -4.051822               | 1.123391  | 1.087192  |
| 39               | 6                | 0              | -3.319960               | -0.060496 | 0.903743  |

|     |   |   |           |           |           |
|-----|---|---|-----------|-----------|-----------|
| 40  | 6 | 0 | -2.692249 | 0.143698  | -2.925002 |
| 41  | 6 | 0 | -3.766505 | -0.704815 | -3.650256 |
| 42  | 6 | 0 | -5.067087 | 3.306426  | 0.254624  |
| 43  | 6 | 0 | -4.202280 | 4.276504  | 1.092685  |
| 44  | 6 | 0 | -3.052739 | -0.974365 | 2.096536  |
| 45  | 6 | 0 | -2.774951 | -0.206968 | 3.407272  |
| 46  | 9 | 0 | 6.023183  | 0.459769  | -1.578881 |
| 47  | 9 | 0 | 4.830376  | -1.295114 | -2.006225 |
| 48  | 6 | 0 | -2.399652 | 1.385283  | -3.800410 |
| 49  | 6 | 0 | -6.441998 | 3.086699  | 0.923057  |
| 50  | 6 | 0 | -4.230191 | -1.956785 | 2.298913  |
| 51  | 1 | 0 | -0.158644 | -4.885366 | -1.733195 |
| 52  | 1 | 0 | -2.618371 | -4.811307 | -1.838663 |
| 53  | 1 | 0 | -4.086074 | 2.319369  | -2.084074 |
| 54  | 1 | 0 | -4.401771 | 1.383101  | 2.086977  |
| 55  | 1 | 0 | 2.035928  | -4.899145 | -1.056419 |
| 56  | 1 | 0 | 3.209034  | -3.565260 | -1.392520 |
| 57  | 1 | 0 | 1.868265  | -3.901776 | -2.549058 |
| 58  | 1 | 0 | -4.645595 | -3.988605 | -2.605148 |
| 59  | 1 | 0 | -5.938832 | -3.474577 | -1.459851 |
| 60  | 1 | 0 | -4.704955 | -4.682702 | -0.944449 |
| 61  | 1 | 0 | -1.770435 | -0.456214 | -2.865545 |
| 62  | 1 | 0 | -1.748453 | 2.114272  | -3.300509 |
| 63  | 1 | 0 | -3.334833 | 1.899462  | -4.076899 |
| 64  | 1 | 0 | -1.914615 | 1.062705  | -4.735374 |
| 65  | 1 | 0 | -4.704240 | -0.128750 | -3.722999 |
| 66  | 1 | 0 | -3.980593 | -1.635592 | -3.115554 |
| 67  | 1 | 0 | -3.429519 | -0.944891 | -4.672758 |
| 68  | 1 | 0 | -5.239241 | 3.772387  | -0.731240 |
| 69  | 1 | 0 | -7.069510 | 2.409418  | 0.322376  |
| 70  | 1 | 0 | -6.970314 | 4.047257  | 1.040084  |
| 71  | 1 | 0 | -6.322073 | 2.641668  | 1.924400  |
| 72  | 1 | 0 | -4.001178 | 3.846233  | 2.087775  |
| 73  | 1 | 0 | -4.721810 | 5.239190  | 1.232685  |
| 74  | 1 | 0 | -3.234363 | 4.465463  | 0.602689  |
| 75  | 1 | 0 | -2.161831 | -1.572595 | 1.866629  |
| 76  | 1 | 0 | -5.148710 | -1.396945 | 2.542941  |
| 77  | 1 | 0 | -4.013984 | -2.648125 | 3.131047  |
| 78  | 1 | 0 | -4.414759 | -2.537847 | 1.385213  |
| 79  | 1 | 0 | -3.694296 | 0.254536  | 3.803204  |
| 80  | 1 | 0 | -2.032355 | 0.593136  | 3.260465  |
| 81  | 1 | 0 | -2.396088 | -0.902529 | 4.173014  |
| 82  | 1 | 0 | 3.498024  | 1.866492  | -2.547540 |
| 83  | 1 | 0 | 3.512989  | 4.298473  | -2.015398 |
| 84  | 1 | 0 | 4.498939  | 3.392947  | 2.100084  |
| 85  | 1 | 0 | 4.466539  | 0.957810  | 1.569400  |
| 86  | 1 | 0 | -1.318249 | 1.297301  | 0.499879  |
| 87  | 1 | 0 | 0.260648  | 1.810107  | 2.356443  |
| 88  | 1 | 0 | 1.512800  | 2.267035  | 1.173691  |
| 89  | 1 | 0 | -1.235079 | 3.613389  | 1.532853  |
| 90  | 1 | 0 | 0.328350  | 4.292098  | 2.044007  |
| 91  | 1 | 0 | 1.093951  | 4.378327  | -0.325559 |
| 92  | 1 | 0 | -0.432268 | 5.280016  | -0.150603 |
| 93  | 1 | 0 | -0.440159 | 3.793102  | -2.201209 |
| 94  | 1 | 0 | -1.707360 | 3.313680  | -1.048736 |
| 95  | 1 | 0 | 1.052357  | 1.975267  | -1.322024 |
| 96  | 1 | 0 | -0.485084 | 1.290918  | -1.878476 |
| 97  | 1 | 0 | -0.231040 | -0.428387 | 2.657053  |
| 98  | 1 | 0 | 1.254649  | -2.978206 | 1.817864  |
| 99  | 1 | 0 | -0.505935 | -2.829755 | 1.900290  |
| 100 | 1 | 0 | -0.377625 | -2.327477 | 4.351987  |
| 101 | 1 | 0 | 0.358877  | -3.901691 | 3.983104  |
| 102 | 1 | 0 | 1.791349  | -2.551045 | 5.575543  |
| 103 | 1 | 0 | 2.635232  | -2.884105 | 4.046811  |
| 104 | 1 | 0 | 2.967031  | -0.494916 | 4.668429  |
| 105 | 1 | 0 | 1.210179  | -0.254881 | 4.778320  |
| 106 | 1 | 0 | 2.748209  | -1.011966 | 2.206218  |
| 107 | 1 | 0 | 2.104673  | 0.584868  | 2.583768  |

**TS-Cbound**

SCF Done: E(RB97D) = -2217.48191861 A.U.

| Center Number | Atomic Number | Atomic Type | Coordinates (Angstroms) |          |           |
|---------------|---------------|-------------|-------------------------|----------|-----------|
|               |               |             | X                       | Y        | Z         |
| 1             | 6             | 0           | -3.791066               | 0.095962 | 0.006294  |
| 2             | 6             | 0           | -3.128971               | 0.588591 | 1.144888  |
| 3             | 6             | 0           | -1.953265               | 1.353604 | 1.059404  |
| 4             | 6             | 0           | -1.401523               | 1.620692 | -0.224526 |
| 5             | 6             | 0           | -2.040698               | 1.118985 | -1.383108 |
| 6             | 6             | 0           | -3.230113               | 0.378886 | -1.244314 |
| 7             | 6             | 0           | -0.167390               | 2.468497 | -0.359472 |
| 8             | 6             | 0           | 1.145401                | 1.956445 | -0.266011 |
| 9             | 6             | 0           | 2.250706                | 2.823552 | -0.468178 |
| 10            | 6             | 0           | 2.048709                | 4.184691 | -0.731433 |
| 11            | 6             | 0           | 0.744876                | 4.701477 | -0.795375 |

|    |    |   |           |           |           |
|----|----|---|-----------|-----------|-----------|
| 12 | 6  | 0 | -0.356367 | 3.856134  | -0.609021 |
| 13 | 15 | 0 | 1.395964  | 0.136143  | 0.212190  |
| 14 | 6  | 0 | 2.367000  | -0.714647 | -1.233884 |
| 15 | 6  | 0 | 3.871847  | -0.944584 | -1.011032 |
| 16 | 6  | 0 | 4.446035  | -1.783342 | -2.175685 |
| 17 | 6  | 0 | 4.186412  | -1.104076 | -3.535811 |
| 18 | 6  | 0 | 2.680636  | -0.839014 | -3.736310 |
| 19 | 6  | 0 | 2.109736  | -0.002213 | -2.572930 |
| 20 | 8  | 0 | 3.496692  | 2.245418  | -0.385360 |
| 21 | 6  | 0 | 4.637478  | 3.079978  | -0.566263 |
| 22 | 8  | 0 | -1.665805 | 4.280727  | -0.643387 |
| 23 | 6  | 0 | -1.903516 | 5.663641  | -0.899026 |
| 24 | 6  | 0 | -1.339937 | 1.928515  | 2.332116  |
| 25 | 6  | 0 | -1.222583 | 0.884588  | 3.461678  |
| 26 | 6  | 0 | -1.494618 | 1.374257  | -2.785496 |
| 27 | 6  | 0 | -2.337006 | 2.453147  | -3.504548 |
| 28 | 6  | 0 | -5.072578 | -0.710308 | 0.192131  |
| 29 | 6  | 0 | -6.194357 | 0.196715  | 0.753712  |
| 30 | 46 | 0 | -0.551905 | -1.183861 | 0.616615  |
| 31 | 6  | 0 | -1.876764 | -3.140086 | 0.818161  |
| 32 | 9  | 0 | -2.879083 | -2.972460 | -0.101522 |
| 33 | 6  | 0 | -0.130429 | -3.029415 | -0.126788 |
| 34 | 6  | 0 | 0.932340  | -3.755728 | 0.471035  |
| 35 | 6  | 0 | 1.825079  | -4.484891 | -0.324520 |
| 36 | 6  | 0 | 1.651665  | -4.555549 | -1.720297 |
| 37 | 6  | 0 | 0.558742  | -3.899019 | -2.310451 |
| 38 | 6  | 0 | -0.338971 | -3.160344 | -1.523795 |
| 39 | 1  | 0 | 2.345565  | -5.133934 | -2.333370 |
| 40 | 9  | 0 | -2.362404 | -2.605857 | 2.017882  |
| 41 | 9  | 0 | -1.813120 | -4.476819 | 1.079145  |
| 42 | 6  | 0 | 2.639372  | 0.176674  | 1.684757  |
| 43 | 6  | 0 | 2.339878  | 1.313019  | 2.677437  |
| 44 | 6  | 0 | 3.339925  | 1.275328  | 3.852220  |
| 45 | 6  | 0 | 3.298726  | -0.090382 | 4.567522  |
| 46 | 6  | 0 | 3.572378  | -1.237755 | 3.574281  |
| 47 | 6  | 0 | 2.586449  | -1.194355 | 2.388225  |
| 48 | 6  | 0 | -2.156658 | 3.158116  | 2.792696  |
| 49 | 6  | 0 | -1.434127 | 0.085459  | -3.636359 |
| 50 | 6  | 0 | -5.558597 | -1.421846 | -1.082383 |
| 51 | 1  | 0 | 2.661280  | -5.006232 | 0.148712  |
| 52 | 1  | 0 | 0.397590  | -3.962561 | -3.389636 |
| 53 | 1  | 0 | -1.194823 | -2.666393 | -1.981712 |
| 54 | 1  | 0 | 1.067439  | -3.712461 | 1.551596  |
| 55 | 1  | 0 | 3.642132  | 0.337865  | 1.265190  |
| 56 | 1  | 0 | 1.877015  | -1.698066 | -1.271268 |
| 57 | 1  | 0 | 1.321341  | 1.187945  | 3.073557  |
| 58 | 1  | 0 | 2.380683  | 2.287447  | 2.168388  |
| 59 | 1  | 0 | 1.553718  | -1.364033 | 2.743135  |
| 60 | 1  | 0 | 2.804752  | -2.003523 | 1.673873  |
| 61 | 1  | 0 | 4.389496  | 0.026001  | -0.960575 |
| 62 | 1  | 0 | 4.047016  | -1.468679 | -0.059108 |
| 63 | 1  | 0 | 2.593277  | 0.988618  | -2.553886 |
| 64 | 1  | 0 | 1.033123  | 0.158232  | -2.714756 |
| 65 | 1  | 0 | 2.890293  | 4.858662  | -0.885726 |
| 66 | 1  | 0 | 4.360146  | 1.451495  | 3.463799  |
| 67 | 1  | 0 | 3.115922  | 2.089467  | 4.562408  |
| 68 | 1  | 0 | 3.504038  | -2.213731 | 4.083830  |
| 69 | 1  | 0 | 4.604369  | -1.143036 | 3.188755  |
| 70 | 1  | 0 | 5.527718  | -1.942982 | -2.024869 |
| 71 | 1  | 0 | 3.959924  | -2.774224 | -2.167462 |
| 72 | 1  | 0 | 2.144301  | -1.803218 | -3.772717 |
| 73 | 1  | 0 | 2.502033  | -0.323732 | -4.695749 |
| 74 | 1  | 0 | 0.610299  | 5.763973  | -0.991819 |
| 75 | 1  | 0 | 4.637064  | 3.544683  | -1.568524 |
| 76 | 1  | 0 | 5.507122  | 2.418514  | -0.463617 |
| 77 | 1  | 0 | 4.676095  | 3.874200  | 0.200713  |
| 78 | 1  | 0 | 2.295919  | -0.231153 | 5.010605  |
| 79 | 1  | 0 | 4.027924  | -0.115194 | 5.394821  |
| 80 | 1  | 0 | 4.728471  | -0.140411 | -3.567557 |
| 81 | 1  | 0 | 4.581261  | -1.726711 | -4.356618 |
| 82 | 1  | 0 | -0.323809 | 2.276444  | 2.098329  |
| 83 | 1  | 0 | -3.544267 | 0.364600  | 2.128464  |
| 84 | 1  | 0 | -3.712181 | 0.000058  | -2.144827 |
| 85 | 1  | 0 | -0.469069 | 1.760302  | -2.689989 |
| 86 | 1  | 0 | -1.446021 | 6.298797  | -0.118910 |
| 87 | 1  | 0 | -2.994073 | 5.783466  | -0.884941 |
| 88 | 1  | 0 | -1.506165 | 5.961405  | -1.886279 |
| 89 | 1  | 0 | -2.215053 | 3.904826  | 1.986320  |
| 90 | 1  | 0 | -1.693102 | 3.622328  | 3.679831  |
| 91 | 1  | 0 | -3.183921 | 2.855740  | 3.056549  |
| 92 | 1  | 0 | -2.212144 | 0.545165  | 3.805845  |
| 93 | 1  | 0 | -0.696320 | 1.321044  | 4.326928  |
| 94 | 1  | 0 | -0.661994 | 0.000878  | 3.112842  |
| 95 | 1  | 0 | -0.909298 | -0.720545 | -3.102458 |
| 96 | 1  | 0 | -0.906867 | 0.283319  | -4.584122 |
| 97 | 1  | 0 | -2.445981 | -0.273725 | -3.884768 |
| 98 | 1  | 0 | -3.373472 | 2.099308  | -3.634469 |

|     |   |   |           |           |           |
|-----|---|---|-----------|-----------|-----------|
| 99  | 1 | 0 | -1.918749 | 2.669925  | -4.502286 |
| 100 | 1 | 0 | -2.362607 | 3.380710  | -2.915100 |
| 101 | 1 | 0 | -4.850083 | -1.483639 | 0.946694  |
| 102 | 1 | 0 | -5.858139 | -0.688418 | -1.850309 |
| 103 | 1 | 0 | -6.436371 | -2.045735 | -0.851714 |
| 104 | 1 | 0 | -4.772409 | -2.064815 | -1.503210 |
| 105 | 1 | 0 | -5.882103 | 0.686233  | 1.689560  |
| 106 | 1 | 0 | -7.104483 | -0.392977 | 0.954184  |
| 107 | 1 | 0 | -6.444413 | 0.984616  | 0.023499  |

a-F elimination TS for Brettphos and Xantphos:

**TS<sub>a-F-Brettphos</sub>**

SCF Done: E(RB+HF-LYP) = -2218.54542804 A.U.

| Center<br>Number | Atomic<br>Number | Atomic<br>Type | Coordinates (Angstroms) |           |           |
|------------------|------------------|----------------|-------------------------|-----------|-----------|
|                  |                  |                | X                       | Y         | Z         |
| 1                | 6                | 0              | 3.045978                | -1.205475 | 2.124244  |
| 2                | 6                | 0              | 2.779960                | 0.185710  | 1.515367  |
| 3                | 6                | 0              | 2.314973                | 1.149938  | 2.621388  |
| 4                | 6                | 0              | 3.377554                | 1.247543  | 3.731155  |
| 5                | 6                | 0              | 3.726729                | -0.129634 | 4.314673  |
| 6                | 6                | 0              | 4.135250                | -1.113286 | 3.208295  |
| 7                | 15               | 0              | 1.487190                | 0.075569  | 0.075904  |
| 8                | 46               | 0              | -0.110676               | -1.699147 | 0.923892  |
| 9                | 6                | 0              | -0.123104               | -2.855342 | -0.752901 |
| 10               | 6                | 0              | 0.972448                | -3.701688 | -0.989137 |
| 11               | 6                | 0              | 0.978918                | -4.583015 | -2.076976 |
| 12               | 6                | 0              | -0.118277               | -4.644722 | -2.938002 |
| 13               | 6                | 0              | -1.222608               | -3.825780 | -2.696570 |
| 14               | 6                | 0              | -1.228326               | -2.944560 | -1.608365 |
| 15               | 6                | 0              | 0.981297                | 1.891814  | -0.284825 |
| 16               | 6                | 0              | -0.354802               | 2.345202  | -0.362954 |
| 17               | 6                | 0              | -0.594691               | 3.717122  | -0.656908 |
| 18               | 6                | 0              | 0.452045                | 4.612096  | -0.837597 |
| 19               | 6                | 0              | 1.768542                | 4.164526  | -0.753518 |
| 20               | 6                | 0              | 2.033126                | 2.824924  | -0.493521 |
| 21               | 6                | 0              | -1.587974               | 1.495445  | -0.167314 |
| 22               | 6                | 0              | -2.187617               | 1.397026  | 1.114354  |
| 23               | 6                | 0              | -3.368948               | 0.655994  | 1.244620  |
| 24               | 6                | 0              | -3.997140               | 0.041695  | 0.160648  |
| 25               | 6                | 0              | -3.420439               | 0.205719  | -1.101787 |
| 26               | 6                | 0              | -2.241191               | 0.934906  | -1.294367 |
| 27               | 6                | 0              | -5.284965               | -0.748578 | 0.359343  |
| 28               | 6                | 0              | -5.079407               | -2.252820 | 0.096523  |
| 29               | 6                | 0              | -1.669132               | 2.168302  | 2.332575  |
| 30               | 6                | 0              | -2.439129               | 3.499137  | 2.488752  |
| 31               | 6                | 0              | -1.781643               | 1.205751  | -2.730642 |
| 32               | 6                | 0              | -1.649544               | -0.057954 | -3.598443 |
| 33               | 8                | 0              | 3.313664                | 2.338917  | -0.436183 |
| 34               | 6                | 0              | 4.397054                | 3.247789  | -0.545119 |
| 35               | 8                | 0              | -1.911371               | 4.088285  | -0.751943 |
| 36               | 6                | 0              | -2.212246               | 5.448006  | -1.019007 |
| 37               | 6                | 0              | 2.457083                | -0.530470 | -1.505375 |
| 38               | 6                | 0              | 3.983968                | -0.663453 | -1.366026 |
| 39               | 6                | 0              | 4.573685                | -1.356532 | -2.609910 |
| 40               | 6                | 0              | 4.207422                | -0.613826 | -3.902522 |
| 41               | 6                | 0              | 2.687745                | -0.433686 | -4.023046 |
| 42               | 6                | 0              | 2.098034                | 0.254056  | -2.778344 |
| 43               | 6                | 0              | -1.736095               | 1.378544  | 3.652005  |
| 44               | 6                | 0              | -2.734469               | 2.207946  | -3.418687 |
| 45               | 6                | 0              | -6.446566               | -0.194520 | -0.486821 |
| 46               | 6                | 0              | -1.108191               | -3.011867 | 1.915910  |
| 47               | 9                | 0              | -2.203489               | -2.770421 | 2.567867  |
| 48               | 9                | 0              | 0.009975                | -0.965985 | 2.876712  |
| 49               | 9                | 0              | -0.681946               | -4.178744 | 2.300546  |
| 50               | 1                | 0              | -0.116889               | -5.331195 | -3.780850 |
| 51               | 1                | 0              | 1.840837                | -5.225779 | -2.243149 |
| 52               | 1                | 0              | -2.088333               | -3.871633 | -3.353947 |
| 53               | 1                | 0              | -2.099294               | -2.320943 | -1.432818 |
| 54               | 1                | 0              | 1.833699                | -3.682138 | -0.324098 |
| 55               | 1                | 0              | 3.698348                | 0.567615  | 1.063658  |
| 56               | 1                | 0              | 2.049324                | -1.539065 | -1.623485 |
| 57               | 1                | 0              | 1.375318                | 0.760855  | 3.028289  |
| 58               | 1                | 0              | 2.121274                | 2.147450  | 2.211579  |
| 59               | 1                | 0              | 2.115669                | -1.560022 | 2.579755  |
| 60               | 1                | 0              | 3.344418                | -1.931134 | 1.356491  |
| 61               | 1                | 0              | 4.433525                | 0.329031  | -1.254978 |
| 62               | 1                | 0              | 4.251040                | -1.238616 | -0.473378 |
| 63               | 1                | 0              | 2.490906                | 1.275540  | -2.706478 |
| 64               | 1                | 0              | 1.013094                | 0.336201  | -2.886086 |
| 65               | 1                | 0              | 2.574485                | 4.872182  | -0.903529 |
| 66               | 1                | 0              | 4.289540                | 1.710142  | 3.322489  |
| 67               | 1                | 0              | 3.018315                | 1.915519  | 4.524893  |
| 68               | 1                | 0              | 4.317554                | -2.109235 | 3.632709  |
| 69               | 1                | 0              | 5.083935                | -0.786225 | 2.755346  |



|     |   |   |           |           |           |
|-----|---|---|-----------|-----------|-----------|
| 70  | 1 | 0 | 5.664218  | -1.432110 | -2.507046 |
| 71  | 1 | 0 | 4.191282  | -2.386226 | -2.663310 |
| 72  | 1 | 0 | 2.212664  | -1.417060 | -4.149150 |
| 73  | 1 | 0 | 2.441709  | 0.151249  | -4.918936 |
| 74  | 1 | 0 | 0.265158  | 5.657703  | -1.050206 |
| 75  | 1 | 0 | 4.415798  | 3.739765  | -1.526461 |
| 76  | 1 | 0 | 5.301563  | 2.648318  | -0.427190 |
| 77  | 1 | 0 | 4.361433  | 4.010935  | 0.242707  |
| 78  | 1 | 0 | 2.848485  | -0.529765 | 4.839758  |
| 79  | 1 | 0 | 4.528485  | -0.036200 | 5.059171  |
| 80  | 1 | 0 | 4.691164  | 0.374629  | -3.901361 |
| 81  | 1 | 0 | 4.598895  | -1.152236 | -4.775295 |
| 82  | 1 | 0 | -0.616589 | 2.412977  | 2.153398  |
| 83  | 1 | 0 | -3.826639 | 0.570855  | 2.226141  |
| 84  | 1 | 0 | -3.916887 | -0.219940 | -1.970437 |
| 85  | 1 | 0 | -0.793741 | 1.675505  | -2.686632 |
| 86  | 1 | 0 | -1.830799 | 6.109104  | -0.229377 |
| 87  | 1 | 0 | -3.301492 | 5.510517  | -1.045059 |
| 88  | 1 | 0 | -1.807284 | 5.769922  | -1.987863 |
| 89  | 1 | 0 | -2.400892 | 4.103543  | 1.579917  |
| 90  | 1 | 0 | -2.021285 | 4.082983  | 3.318506  |
| 91  | 1 | 0 | -3.494601 | 3.303925  | 2.716520  |
| 92  | 1 | 0 | -2.772434 | 1.217689  | 3.975736  |
| 93  | 1 | 0 | -1.244964 | 1.956459  | 4.445449  |
| 94  | 1 | 0 | -1.230306 | 0.415205  | 3.553250  |
| 95  | 1 | 0 | -0.977818 | -0.796127 | -3.153606 |
| 96  | 1 | 0 | -1.261252 | 0.208292  | -4.589404 |
| 97  | 1 | 0 | -2.619262 | -0.546336 | -3.752917 |
| 98  | 1 | 0 | -3.735301 | 1.775045  | -3.536644 |
| 99  | 1 | 0 | -2.362527 | 2.467121  | -4.418077 |
| 100 | 1 | 0 | -2.831865 | 3.124319  | -2.832002 |
| 101 | 1 | 0 | -5.568033 | -0.638195 | 1.415156  |
| 102 | 1 | 0 | -4.792572 | -2.438660 | -0.945619 |
| 103 | 1 | 0 | -6.002230 | -2.812185 | 0.293728  |
| 104 | 1 | 0 | -4.290388 | -2.658723 | 0.738739  |
| 105 | 1 | 0 | -6.616369 | 0.867571  | -0.278396 |
| 106 | 1 | 0 | -7.374482 | -0.738136 | -0.271407 |
| 107 | 1 | 0 | -6.245422 | -0.296233 | -1.559917 |

**TS<sub>r</sub>-Xantphos**

SCF Done: E(RB+HF-LYP) = -2289.56079001 A.U.

| Center Number | Atomic Number | Atomic Type | Coordinates (Angstroms) |           |           |
|---------------|---------------|-------------|-------------------------|-----------|-----------|
|               |               |             | X                       | Y         | Z         |
| 1             | 6             | 0           | 3.488519                | -2.804203 | -0.201842 |
| 2             | 6             | 0           | 2.104460                | -2.603270 | -0.131710 |
| 3             | 6             | 0           | 1.348337                | -3.451985 | 0.692800  |
| 4             | 6             | 0           | 1.964414                | -4.451072 | 1.454502  |
| 5             | 6             | 0           | 3.347525                | -4.630141 | 1.390921  |
| 6             | 6             | 0           | 4.104727                | -3.806575 | 0.556797  |
| 7             | 46            | 0           | 1.085380                | -1.217240 | -1.225022 |
| 8             | 6             | 0           | 0.558784                | -2.453713 | -2.615212 |
| 9             | 9             | 0           | 0.926686                | -2.343144 | -3.853777 |
| 10            | 15            | 0           | -2.120123               | -0.734359 | 0.240509  |
| 11            | 6             | 0           | -2.871439               | 0.948027  | -0.193620 |
| 12            | 6             | 0           | -2.064650               | 2.091247  | -0.257693 |
| 13            | 6             | 0           | -2.564079               | 3.347454  | -0.636523 |
| 14            | 6             | 0           | -3.918476               | 3.432412  | -0.972818 |
| 15            | 6             | 0           | -4.747718               | 2.313298  | -0.917712 |
| 16            | 6             | 0           | -4.224538               | 1.083399  | -0.527716 |
| 17            | 6             | 0           | -1.635763               | 4.563559  | -0.572639 |
| 18            | 6             | 0           | -0.211098               | 4.095367  | -0.881467 |
| 19            | 6             | 0           | 0.176608                | 2.814270  | -0.463583 |
| 20            | 8             | 0           | -0.733612               | 1.946448  | 0.086608  |
| 21            | 6             | 0           | 1.508158                | 2.376212  | -0.533768 |
| 22            | 6             | 0           | 2.459891                | 3.234045  | -1.092767 |
| 23            | 6             | 0           | 2.087488                | 4.488537  | -1.572660 |
| 24            | 6             | 0           | 0.765897                | 4.913533  | -1.458170 |
| 25            | 6             | 0           | -2.090276               | 5.685998  | -1.524117 |
| 26            | 6             | 0           | -1.653209               | 5.110420  | 0.885137  |
| 27            | 15            | 0           | 1.961797                | 0.673383  | 0.127073  |
| 28            | 6             | 0           | 1.613115                | 0.823819  | 1.963665  |
| 29            | 6             | 0           | 1.223143                | -0.310739 | 2.683394  |
| 30            | 6             | 0           | 0.956961                | -0.213470 | 4.051117  |
| 31            | 6             | 0           | 1.079879                | 1.012511  | 4.705585  |
| 32            | 6             | 0           | 1.470872                | 2.146860  | 3.989997  |
| 33            | 6             | 0           | 1.734723                | 2.055130  | 2.622761  |
| 34            | 6             | 0           | -3.207378               | -1.806572 | -0.882305 |
| 35            | 6             | 0           | -2.939118               | -1.726097 | -2.259011 |
| 36            | 6             | 0           | -3.687803               | -2.482763 | -3.160780 |
| 37            | 6             | 0           | -4.696420               | -3.335900 | -2.703311 |
| 38            | 6             | 0           | -4.954740               | -3.427220 | -1.335417 |
| 39            | 6             | 0           | -4.216667               | -2.661905 | -0.426398 |
| 40            | 6             | 0           | -2.852237               | -1.064470 | 1.954550  |
| 41            | 6             | 0           | -2.461922               | -2.251862 | 2.595692  |

|    |   |   |           |           |           |
|----|---|---|-----------|-----------|-----------|
| 42 | 6 | 0 | -2.909705 | -2.554896 | 3.881750  |
| 43 | 6 | 0 | -3.742348 | -1.661715 | 4.560642  |
| 44 | 6 | 0 | -4.124285 | -0.471928 | 3.940178  |
| 45 | 6 | 0 | -3.687308 | -0.177274 | 2.645563  |
| 46 | 6 | 0 | 3.838689  | 0.683812  | -0.007406 |
| 47 | 6 | 0 | 4.677149  | 0.871348  | 1.095639  |
| 48 | 6 | 0 | 6.065586  | 0.847274  | 0.935107  |
| 49 | 6 | 0 | 6.625348  | 0.644456  | -0.326358 |
| 50 | 6 | 0 | 5.792031  | 0.456647  | -1.432480 |
| 51 | 6 | 0 | 4.406196  | 0.466930  | -1.272524 |
| 52 | 9 | 0 | -0.194621 | -0.167135 | -2.507799 |
| 53 | 9 | 0 | -0.379745 | -3.349297 | -2.568929 |
| 54 | 1 | 0 | 2.832847  | 5.141535  | -2.017258 |
| 55 | 1 | 0 | 3.828085  | -5.408103 | 1.978766  |
| 56 | 1 | 0 | 0.499797  | 5.904379  | -1.809381 |
| 57 | 1 | 0 | 4.103461  | -2.178709 | -0.841367 |
| 58 | 1 | 0 | 5.182391  | -3.940692 | 0.491234  |
| 59 | 1 | 0 | 1.358931  | -5.092985 | 2.091011  |
| 60 | 1 | 0 | 0.267845  | -3.336908 | 0.745018  |
| 61 | 1 | 0 | 3.495439  | 2.922307  | -1.157878 |
| 62 | 1 | 0 | -4.865306 | 0.207949  | -0.501662 |
| 63 | 1 | 0 | -5.797992 | 2.401189  | -1.181178 |
| 64 | 1 | 0 | -4.339925 | 4.384655  | -1.275709 |
| 65 | 1 | 0 | 4.253495  | 1.030184  | 2.081749  |
| 66 | 1 | 0 | 6.707621  | 0.987915  | 1.800597  |
| 67 | 1 | 0 | 7.705019  | 0.628075  | -0.448396 |
| 68 | 1 | 0 | 6.219456  | 0.292509  | -2.418025 |
| 69 | 1 | 0 | 3.760942  | 0.300281  | -2.132143 |
| 70 | 1 | 0 | 1.125083  | -1.265345 | 2.178597  |
| 71 | 1 | 0 | 0.641255  | -1.096898 | 4.598672  |
| 72 | 1 | 0 | 0.867094  | 1.086603  | 5.768750  |
| 73 | 1 | 0 | 1.566482  | 3.105065  | 4.493994  |
| 74 | 1 | 0 | 2.029124  | 2.941604  | 2.068464  |
| 75 | 1 | 0 | -1.800656 | -2.947438 | 2.083640  |
| 76 | 1 | 0 | -2.603418 | -3.484398 | 4.355254  |
| 77 | 1 | 0 | -4.086792 | -1.890720 | 5.565754  |
| 78 | 1 | 0 | -4.769742 | 0.230920  | 4.461316  |
| 79 | 1 | 0 | -3.999315 | 0.749756  | 2.175612  |
| 80 | 1 | 0 | -4.434987 | -2.733068 | 0.634889  |
| 81 | 1 | 0 | -5.737114 | -4.088424 | -0.970475 |
| 82 | 1 | 0 | -5.274591 | -3.927373 | -3.408827 |
| 83 | 1 | 0 | -3.478769 | -2.409729 | -4.225486 |
| 84 | 1 | 0 | -2.131618 | -1.081940 | -2.604625 |
| 85 | 1 | 0 | -3.094528 | 6.033551  | -1.265324 |
| 86 | 1 | 0 | -1.434379 | 6.557671  | -1.441165 |
| 87 | 1 | 0 | -2.096837 | 5.353639  | -2.567417 |
| 88 | 1 | 0 | -2.665931 | 5.427588  | 1.159880  |
| 89 | 1 | 0 | -1.331283 | 4.344324  | 1.597830  |
| 90 | 1 | 0 | -0.979678 | 5.970538  | 0.979504  |

PMe<sub>2</sub>CH<sub>2</sub>CH<sub>2</sub>PMe<sub>2</sub>-CP  
 SCF Done: E(RB3LYP) = -947.304890997 A.U.

| Center Number | Atomic Number | Atomic Type | Coordinates (Angstroms) |           |           |
|---------------|---------------|-------------|-------------------------|-----------|-----------|
|               |               |             | X                       | Y         | Z         |
| 1             | 6             | 0           | 4.071998                | 0.579173  | -1.110725 |
| 2             | 6             | 0           | 2.686200                | 0.386035  | -1.147925 |
| 3             | 6             | 0           | 1.988293                | -0.096561 | -0.028719 |
| 4             | 6             | 0           | 2.727969                | -0.395994 | 1.125804  |
| 5             | 6             | 0           | 4.112408                | -0.195901 | 1.169606  |
| 6             | 6             | 0           | 4.790524                | 0.294317  | 0.051988  |
| 7             | 46            | 0           | -0.051296               | -0.265305 | -0.040996 |
| 8             | 6             | 0           | 0.199068                | -2.296135 | -0.088320 |
| 9             | 9             | 0           | 0.989798                | -2.772769 | -1.084923 |
| 10            | 15            | 0           | -2.535319               | -0.326603 | 0.015080  |
| 11            | 6             | 0           | -3.134865               | 1.447195  | 0.392131  |
| 12            | 6             | 0           | -2.245762               | 2.508455  | -0.272586 |
| 13            | 15            | 0           | -0.390272               | 2.185679  | 0.049687  |
| 14            | 9             | 0           | 0.701667                | -2.812408 | 1.072655  |
| 15            | 9             | 0           | -1.011403               | -2.968460 | -0.265255 |
| 16            | 1             | 0           | 2.227427                | -0.809594 | 1.997282  |
| 17            | 1             | 0           | 4.662669                | -0.435587 | 2.077541  |
| 18            | 1             | 0           | 5.867091                | 0.444187  | 0.083588  |
| 19            | 1             | 0           | 4.589577                | 0.948020  | -1.994441 |
| 20            | 1             | 0           | 2.151778                | 0.609592  | -2.069408 |
| 21            | 1             | 0           | -4.179620               | 1.569631  | 0.082381  |
| 22            | 1             | 0           | -3.106550               | 1.555142  | 1.483079  |
| 23            | 1             | 0           | -2.518867               | 3.514175  | 0.068614  |
| 24            | 1             | 0           | -2.375039               | 2.488000  | -1.361416 |
| 25            | 6             | 0           | -0.079271               | 3.000347  | 1.718290  |
| 26            | 6             | 0           | 0.468044                | 3.356397  | -1.144323 |
| 27            | 6             | 0           | -3.409328               | -0.776168 | -1.589928 |
| 28            | 6             | 0           | -3.442822               | -1.372375 | 1.285321  |
| 29            | 1             | 0           | 0.187514                | 4.397583  | -0.955416 |
| 30            | 1             | 0           | 1.547987                | 3.234816  | -1.027099 |

|    |   |   |           |           |           |
|----|---|---|-----------|-----------|-----------|
| 31 | 1 | 0 | 0.201152  | 3.084496  | -2.169313 |
| 32 | 1 | 0 | -0.350591 | 4.061188  | 1.701113  |
| 33 | 1 | 0 | -0.659064 | 2.485497  | 2.488970  |
| 34 | 1 | 0 | 0.981391  | 2.894477  | 1.961507  |
| 35 | 1 | 0 | -4.528456 | -1.259654 | 1.201081  |
| 36 | 1 | 0 | -3.158980 | -2.413735 | 1.118554  |
| 37 | 1 | 0 | -3.118795 | -1.081597 | 2.288316  |
| 38 | 1 | 0 | -4.497880 | -0.720021 | -1.485410 |
| 39 | 1 | 0 | -3.081180 | -0.103989 | -2.387451 |
| 40 | 1 | 0 | -3.113387 | -1.794730 | -1.853746 |

**PMe<sub>2</sub>CH<sub>2</sub>CH<sub>2</sub>PMe<sub>2</sub>-TS**

SCF Done: E(RB3LYP) = -947.253956465 A.U.

| Center Number | Atomic Number | Atomic Type | Coordinates (Angstroms) |           |           |
|---------------|---------------|-------------|-------------------------|-----------|-----------|
|               |               |             | X                       | Y         | Z         |
| 1             | 6             | 0           | -2.606419               | 0.165974  | 1.224135  |
| 2             | 6             | 0           | -2.004629               | -0.124102 | -0.015077 |
| 3             | 6             | 0           | -2.633227               | 0.323019  | -1.194836 |
| 4             | 6             | 0           | -3.772594               | 1.122998  | -1.125579 |
| 5             | 6             | 0           | -4.332307               | 1.456668  | 0.112840  |
| 6             | 6             | 0           | -3.748214               | 0.966770  | 1.283850  |
| 7             | 46            | 0           | 0.058242                | -0.238835 | -0.026675 |
| 8             | 15            | 0           | 2.482822                | -0.960931 | 0.036913  |
| 9             | 6             | 0           | 3.469571                | 0.635486  | -0.343205 |
| 10            | 6             | 0           | 2.876703                | 1.867873  | 0.351683  |
| 11            | 15            | 0           | 1.011286                | 2.086009  | -0.024115 |
| 12            | 6             | 0           | -1.434559               | -1.999946 | -0.071128 |
| 13            | 9             | 0           | -0.705638               | -2.658715 | -1.034143 |
| 14            | 9             | 0           | -1.093577               | -2.523169 | 1.142884  |
| 15            | 9             | 0           | -2.699653               | -2.451686 | -0.294062 |
| 16            | 1             | 0           | -2.221112               | 0.049649  | -2.162718 |
| 17            | 1             | 0           | -4.232723               | 1.481567  | -2.043883 |
| 18            | 1             | 0           | -5.228538               | 2.069432  | 0.161659  |
| 19            | 1             | 0           | -4.189227               | 1.200019  | 2.250566  |
| 20            | 1             | 0           | -2.176965               | -0.236452 | 2.137441  |
| 21            | 1             | 0           | 4.519876                | 0.498598  | -0.056644 |
| 22            | 1             | 0           | 3.444109                | 0.762199  | -1.432486 |
| 23            | 1             | 0           | 3.421314                | 2.774819  | 0.060224  |
| 24            | 1             | 0           | 2.966041                | 1.773023  | 1.440889  |
| 25            | 6             | 0           | 1.072498                | 3.059190  | -1.646530 |
| 26            | 6             | 0           | 0.555478                | 3.455046  | 1.196988  |
| 27            | 6             | 0           | 3.238015                | -1.477045 | 1.693002  |
| 28            | 6             | 0           | 3.318473                | -2.184378 | -1.136396 |
| 29            | 1             | 0           | 4.408510                | -2.172912 | -1.026137 |
| 30            | 1             | 0           | 2.943162                | -3.189351 | -0.924405 |
| 31            | 1             | 0           | 3.053066                | -1.930815 | -2.166483 |
| 32            | 1             | 0           | 4.329681                | -1.550454 | 1.633299  |
| 33            | 1             | 0           | 2.963418                | -0.746775 | 2.459217  |
| 34            | 1             | 0           | 2.823946                | -2.446291 | 1.984485  |
| 35            | 1             | 0           | 1.669641                | 3.972495  | -1.545253 |
| 36            | 1             | 0           | 1.501663                | 2.429112  | -2.430681 |
| 37            | 1             | 0           | 0.052886                | 3.322929  | -1.941016 |
| 38            | 1             | 0           | 1.225772                | 4.317413  | 1.109257  |
| 39            | 1             | 0           | -0.472825               | 3.772623  | 1.003133  |
| 40            | 1             | 0           | 0.604595                | 3.056229  | 2.214031  |

**P(CF<sub>3</sub>)<sub>2</sub>CH<sub>2</sub>CH<sub>2</sub>P(CF<sub>3</sub>)<sub>2</sub>-CP**

SCF Done: E(RB3LYP) = -2138.08894094 A.U.

| Center Number | Atomic Number | Atomic Type | Coordinates (Angstroms) |           |           |
|---------------|---------------|-------------|-------------------------|-----------|-----------|
|               |               |             | X                       | Y         | Z         |
| 1             | 6             | 0           | -4.155185               | 2.042515  | -1.176672 |
| 2             | 6             | 0           | -2.846105               | 1.548654  | -1.175775 |
| 3             | 6             | 0           | -2.031116               | 1.699648  | -0.045913 |
| 4             | 6             | 0           | -2.540452               | 2.362417  | 1.076512  |
| 5             | 6             | 0           | -3.853548               | 2.846214  | 1.076641  |
| 6             | 6             | 0           | -4.663618               | 2.689261  | -0.049027 |
| 7             | 46            | 0           | -0.173733               | 0.867721  | -0.028356 |
| 8             | 6             | 0           | 0.547111                | 2.779510  | -0.057757 |
| 9             | 9             | 0           | 0.100975                | 3.568886  | -1.059928 |
| 10            | 15            | 0           | 2.056527                | -0.307260 | 0.025428  |
| 11            | 6             | 0           | 1.748464                | -2.145214 | 0.411928  |
| 12            | 6             | 0           | 0.482154                | -2.662973 | -0.282622 |
| 13            | 15            | 0           | -0.995055               | -1.498622 | 0.016571  |
| 14            | 9             | 0           | 0.331131                | 3.456275  | 1.101780  |
| 15            | 9             | 0           | 1.920756                | 2.746833  | -0.205065 |
| 16            | 1             | 0           | -1.915084               | 2.521040  | 1.949563  |
| 17            | 1             | 0           | -4.236944               | 3.356637  | 1.957339  |
| 18            | 1             | 0           | -5.681061               | 3.071941  | -0.049611 |
| 19            | 1             | 0           | -4.774805               | 1.920408  | -2.062359 |
| 20            | 1             | 0           | -2.472345               | 1.045110  | -2.064195 |
| 21            | 1             | 0           | 2.621092                | -2.734853 | 0.118546  |

|    |   |   |           |           |           |
|----|---|---|-----------|-----------|-----------|
| 22 | 1 | 0 | 1.646156  | -2.211713 | 1.499888  |
| 23 | 1 | 0 | 0.231303  | -3.670117 | 0.061781  |
| 24 | 1 | 0 | 0.622573  | -2.702106 | -1.367640 |
| 25 | 6 | 0 | -1.690660 | -2.234026 | 1.654874  |
| 26 | 6 | 0 | -2.274156 | -2.213376 | -1.232399 |
| 27 | 6 | 0 | 3.084862  | -0.465446 | -1.596066 |
| 28 | 6 | 0 | 3.472634  | 0.069989  | 1.275598  |
| 29 | 9 | 0 | -2.253799 | -3.558864 | -1.261272 |
| 30 | 9 | 0 | -3.509763 | -1.813030 | -0.922078 |
| 31 | 9 | 0 | -1.963466 | -1.769380 | -2.462538 |
| 32 | 9 | 0 | -1.954055 | -3.550518 | 1.550485  |
| 33 | 9 | 0 | -0.755739 | -2.077985 | 2.615951  |
| 34 | 9 | 0 | -2.805475 | -1.607751 | 2.031312  |
| 35 | 9 | 0 | 4.348593  | -0.951616 | 1.350924  |
| 36 | 9 | 0 | 4.137811  | 1.172102  | 0.928073  |
| 37 | 9 | 0 | 2.935151  | 0.240846  | 2.493873  |
| 38 | 9 | 0 | 4.129620  | -1.304744 | -1.457540 |
| 39 | 9 | 0 | 2.278095  | -0.972188 | -2.553448 |
| 40 | 9 | 0 | 3.543103  | 0.718210  | -1.999959 |

**P(CF<sub>3</sub>)<sub>2</sub>CH<sub>2</sub>CH<sub>2</sub>P(CF<sub>3</sub>)<sub>2</sub>-TS**

SCF Done: E(RB3LYP) = -2138.05310714 A.U.

| Center Number | Atomic Number | Atomic Type | Coordinates (Angstroms) |           |           |
|---------------|---------------|-------------|-------------------------|-----------|-----------|
|               |               |             | X                       | Y         | Z         |
| 1             | 6             | 0           | -2.458453               | -2.204784 | 1.210815  |
| 2             | 6             | 0           | -1.906624               | -1.990239 | -0.059850 |
| 3             | 6             | 0           | -2.738653               | -1.971753 | -1.190733 |
| 4             | 6             | 0           | -4.120164               | -2.082813 | -1.034476 |
| 5             | 6             | 0           | -4.677510               | -2.249323 | 0.237727  |
| 6             | 6             | 0           | -3.844251               | -2.315250 | 1.355768  |
| 7             | 46            | 0           | -0.218843               | -0.787641 | -0.108217 |
| 8             | 15            | 0           | 2.085548                | 0.156961  | 0.001884  |
| 9             | 6             | 0           | 1.932230                | 2.051495  | -0.167178 |
| 10            | 6             | 0           | 0.681321                | 2.588752  | 0.536516  |
| 11            | 15            | 0           | -0.885334               | 1.618515  | 0.037187  |
| 12            | 6             | 0           | -0.204201               | -3.060838 | -0.267294 |
| 13            | 9             | 0           | 0.823843                | -3.031908 | -1.180257 |
| 14            | 9             | 0           | 0.332204                | -3.354365 | 0.946094  |
| 15            | 9             | 0           | -0.904632               | -4.160201 | -0.635347 |
| 16            | 1             | 0           | -2.310731               | -1.864405 | -2.183515 |
| 17            | 1             | 0           | -4.763445               | -2.046024 | -1.910202 |
| 18            | 1             | 0           | -5.753625               | -2.345972 | 0.352636  |
| 19            | 1             | 0           | -4.269398               | -2.463652 | 2.345339  |
| 20            | 1             | 0           | -1.811169               | -2.286664 | 2.078867  |
| 21            | 1             | 0           | 2.833767                | 2.527129  | 0.228326  |
| 22            | 1             | 0           | 1.888676                | 2.249795  | -1.242981 |
| 23            | 1             | 0           | 0.541045                | 3.650598  | 0.316439  |
| 24            | 1             | 0           | 0.766984                | 2.474300  | 1.621767  |
| 25            | 6             | 0           | -1.345151               | 2.569220  | -1.579300 |
| 26            | 6             | 0           | -2.147832               | 2.446376  | 1.239709  |
| 27            | 6             | 0           | 3.001501                | 0.058224  | 1.696735  |
| 28            | 6             | 0           | 3.592174                | -0.126275 | -1.169976 |
| 29            | 9             | 0           | 4.572237                | 0.779956  | -0.985301 |
| 30            | 9             | 0           | 4.109806                | -1.346438 | -0.986933 |
| 31            | 9             | 0           | 3.169442                | -0.017082 | -2.441984 |
| 32            | 9             | 0           | 4.093412                | 0.845603  | 1.755381  |
| 33            | 9             | 0           | 2.152314                | 0.470124  | 2.663195  |
| 34            | 9             | 0           | 3.377261                | -1.196559 | 1.964569  |
| 35            | 9             | 0           | -1.318143               | 3.908986  | -1.440740 |
| 36            | 9             | 0           | -0.446598               | 2.243617  | -2.533414 |
| 37            | 9             | 0           | -2.565208               | 2.219036  | -2.004980 |
| 38            | 9             | 0           | -2.084872               | 3.792098  | 1.229906  |
| 39            | 9             | 0           | -3.398253               | 2.083925  | 0.929182  |
| 40            | 9             | 0           | -1.873354               | 2.032927  | 2.491124  |

**TS<sub>a,F</sub>-P(CF<sub>3</sub>)<sub>2</sub>CH<sub>2</sub>CH<sub>2</sub>P(CF<sub>3</sub>)<sub>2</sub>**

SCF Done: E(RB3LYP) = -2138.03456472 A.U.

| Center Number | Atomic Number | Atomic Type | Coordinates (Angstroms) |           |           |
|---------------|---------------|-------------|-------------------------|-----------|-----------|
|               |               |             | X                       | Y         | Z         |
| 1             | 6             | 0           | -5.769725               | -0.698228 | 1.376905  |
| 2             | 6             | 0           | -5.611892               | -0.455444 | 0.011047  |
| 3             | 6             | 0           | -4.421065               | 0.095863  | -0.474298 |
| 4             | 6             | 0           | -3.377287               | 0.404360  | 0.405530  |
| 5             | 6             | 0           | -3.538779               | 0.162897  | 1.774615  |
| 6             | 6             | 0           | -4.731532               | -0.388137 | 2.256804  |
| 7             | 46            | 0           | -1.649330               | 1.204843  | -0.297386 |
| 8             | 9             | 0           | 0.030960                | 2.181172  | -1.003732 |
| 9             | 6             | 0           | -2.162214               | 3.077400  | -0.320704 |
| 10            | 9             | 0           | -2.532652               | 3.726820  | -1.376692 |
| 11            | 15            | 0           | -0.568195               | -0.975895 | -0.399618 |
| 12            | 6             | 0           | -1.289671               | -2.347164 | -1.540329 |

|    |    |   |           |           |           |
|----|----|---|-----------|-----------|-----------|
| 13 | 9  | 0 | -1.186026 | -1.935228 | -2.816235 |
| 14 | 9  | 0 | -1.844877 | 3.943142  | 0.586587  |
| 15 | 6  | 0 | 1.232090  | -0.917788 | -0.973746 |
| 16 | 6  | 0 | -0.452976 | -1.953885 | 1.257584  |
| 17 | 9  | 0 | -1.616047 | -2.556093 | 1.530368  |
| 18 | 9  | 0 | 0.512406  | -2.887784 | 1.221312  |
| 19 | 9  | 0 | -0.164172 | -1.097917 | 2.253526  |
| 20 | 9  | 0 | -0.602510 | -3.497420 | -1.414056 |
| 21 | 9  | 0 | -2.573592 | -2.586926 | -1.266718 |
| 22 | 1  | 0 | -2.739595 | 0.395598  | 2.474338  |
| 23 | 1  | 0 | -4.844693 | -0.573468 | 3.322393  |
| 24 | 1  | 0 | -6.695888 | -1.124842 | 1.752774  |
| 25 | 1  | 0 | -6.415488 | -0.692342 | -0.682336 |
| 26 | 1  | 0 | -4.316690 | 0.281907  | -1.540617 |
| 27 | 6  | 0 | 2.009796  | 0.131307  | -0.174347 |
| 28 | 1  | 0 | 1.649286  | -1.924462 | -0.887514 |
| 29 | 1  | 0 | 1.186029  | -0.644863 | -2.032774 |
| 30 | 15 | 0 | 3.778250  | 0.341731  | -0.855143 |
| 31 | 1  | 0 | 1.509403  | 1.101272  | -0.301460 |
| 32 | 1  | 0 | 2.063858  | -0.122231 | 0.887722  |
| 33 | 6  | 0 | 4.346226  | 1.704655  | 0.396879  |
| 34 | 6  | 0 | 4.605219  | -1.151199 | 0.057298  |
| 35 | 9  | 0 | 5.940283  | -1.106507 | -0.066733 |
| 36 | 9  | 0 | 4.315485  | -1.232621 | 1.371079  |
| 37 | 9  | 0 | 4.168775  | -2.296452 | -0.519766 |
| 38 | 9  | 0 | 5.688993  | 1.772445  | 0.428403  |
| 39 | 9  | 0 | 3.869421  | 2.894587  | -0.008247 |
| 40 | 9  | 0 | 3.914998  | 1.501591  | 1.657480  |

---
